# Supplementary material
Source: PubMed Central journal article supplement (PMC4980077)
Supplement: NIHMS807823-supplement-Suppl_Table_1-3.pdf [file NIHMS807823-supplement-Suppl_Table_1-3.pdf]

# **Structure of smAKAP and its regulation by PKA-mediated phosphorylation**

Pepijn P. Burgers, Jessica Bruystens, Rebecca J. Burnley,  
Viacheslav O. Nikolaev, Malik Keshwani, Jian Wu, Bert J. C. Janssen,  
Susan S. Taylor, Albert J. R. Heck and Arjen Scholten

DOI: 10.1111/febs.13726

Supplementary Table 1: Identified PKAR1 $\alpha$  peptides of the hydrogen/deuterium exchange experiment displaying their individual deuterium incorporation over time.

| Sequence               | Protein | Start | End | Molecular hydrophobicity | Charge |
|------------------------|---------|-------|-----|--------------------------|--------|
| ASGTTASEEERSLRE        | PKA_R1a | 2     | 16  | 1622.7616                | 2.64   |
| ASGTTASEEERSLRECE      | PKA_R1a | 2     | 18  | 1854.8134                | 2.68   |
| LYVQKHNIQAL            | PKA_R1a | 19    | 29  | 1326.7528                | 2.59   |
| YVQKHNIQ               | PKA_R1a | 20    | 27  | 1029.5476                | 2.17   |
| YVQKHNIQAL             | PKA_R1a | 20    | 29  | 1213.6688                | 2.3    |
| ALLKDSIVQL             | PKA_R1a | 28    | 37  | 1099.6721                | 1.97   |
| KDSIVQL                | PKA_R1a | 31    | 37  | 802.4669                 | 1.44   |
| CTARPERPMA             | PKA_R1a | 38    | 47  | 1131.5398                | 2.33   |
| CTARPERPMAF            | PKA_R1a | 38    | 48  | 1278.6082                | 2.59   |
| CTARPERPMAFL           | PKA_R1a | 38    | 49  | 1391.6922                | 2.65   |
| ARPERPMAF              | PKA_R1a | 40    | 48  | 1074.5513                | 2      |
| EKEEAKQIQNL            | PKA_R1a | 57    | 67  | 1329.7009                | 2.36   |
| IQNLQKA                | PKA_R1a | 64    | 70  | 814.4781                 | 2      |
| VYTEEDAAS              | PKA_R1a | 103   | 111 | 984.4156                 | 1.38   |
| LAKAIEKNVL             | PKA_R1a | 127   | 136 | 1098.6881                | 2.38   |
| AKAIEKNVL              | PKA_R1a | 128   | 136 | 985.6041                 | 1.97   |
| FSHLDDNE               | PKA_R1a | 137   | 144 | 976.4007                 | 1.86   |
| FSHLDDNERSDIF          | PKA_R1a | 137   | 149 | 1594.7132                | 2.64   |
| DAMFPVSF               | PKA_R1a | 150   | 157 | 913.4124                 | 1.32   |
| IAGETVIQQGDEGDN        | PKA_R1a | 158   | 172 | 1545.7027                | 2.01   |
| IAGETVIQQGDEGDNF       | PKA_R1a | 158   | 173 | 1692.7711                | 2.04   |
| TVIQQGDEGDNF           | PKA_R1a | 162   | 173 | 1322.5859                | 1.87   |
| YVIDQGEM               | PKA_R1a | 174   | 181 | 954.4237                 | 1.22   |
| YVIDQGEMD              | PKA_R1a | 174   | 182 | 1069.4507                | 1.44   |
| YVIDQGEMDV             | PKA_R1a | 174   | 183 | 1168.5191                | 1.51   |
| DVYVNNE                | PKA_R1a | 182   | 188 | 852.3734                 | 1.19   |
| WATSVGEGGSF            | PKA_R1a | 189   | 199 | 1097.4898                | 1.36   |
| WATSVGEGGSFGEL         | PKA_R1a | 189   | 202 | 1396.6379                | 1.89   |
| FGELALI                | PKA_R1a | 199   | 205 | 762.4396                 | 1      |
| ALIYGTTPRAAT           | PKA_R1a | 203   | 213 | 1133.6313                | 1.94   |
| WGIDRDSY               | PKA_R1a | 223   | 230 | 1011.453                 | 1.9    |
| RRILMGSTL              | PKA_R1a | 231   | 239 | 1046.6139                | 1.99   |
| FLSKVSIL               | PKA_R1a | 248   | 255 | 906.5659                 | 1.94   |
| LSKVSIL                | PKA_R1a | 249   | 255 | 759.4975                 | 1.72   |
| ESLDKWERLTVA           | PKA_R1a | 256   | 267 | 1446.7587                | 2.66   |
| TVADALE                | PKA_R1a | 265   | 271 | 718.3618                 | 1.03   |
| DALEPVQF               | PKA_R1a | 268   | 275 | 918.4567                 | 1.5    |
| ALEPVQF                | PKA_R1a | 269   | 275 | 803.4298                 | 1.5    |
| PVQFEDGQKIVVQGEPEGDEF  | PKA_R1a | 272   | 291 | 2218.0663                | 2.7    |
| PVQFEDGQKIVVQGEPEGDEFF | PKA_R1a | 272   | 292 | 2365.1347                | 2.87   |
| EDGQKIVVQGEPEGDEF      | PKA_R1a | 276   | 291 | 1746.8181                | 2.12   |
| IILEGSA                | PKA_R1a | 293   | 299 | 702.4032                 | 1.02   |
| AVLQRRSENEEF           | PKA_R1a | 300   | 311 | 1477.7394                | 2.42   |

|                 |         |     |     |           |      |
|-----------------|---------|-----|-----|-----------|------|
| VLQRRSENEEF     | PKA_R1a | 301 | 311 | 1406.7023 | 2.36 |
| FVEVGRLGPSD     | PKA_R1a | 311 | 321 | 1175.6055 | 2.08 |
| FVEVGRLGPSDY    | PKA_R1a | 311 | 322 | 1338.6688 | 1.98 |
| FVEVGRLGPSDYFGE | PKA_R1a | 311 | 325 | 1671.8013 | 2.07 |
| VEVGRLGPSDY     | PKA_R1a | 312 | 322 | 1191.6004 | 1.95 |
| VEVGRLGPSDYFGE  | PKA_R1a | 312 | 325 | 1524.7329 | 2.01 |
| LLMNRPRAAT      | PKA_R1a | 328 | 337 | 1142.6463 | 2.46 |
| LLMNRPRAATV     | PKA_R1a | 328 | 338 | 1241.7147 | 2.6  |
| LMNRPRAAT       | PKA_R1a | 329 | 337 | 1029.5622 | 2.16 |
| LMNRPRAATV      | PKA_R1a | 329 | 338 | 1128.6306 | 2.26 |
| VVARGPLKC       | PKA_R1a | 338 | 346 | 942.5553  | 2.18 |
| VARGPLKC        | PKA_R1a | 339 | 346 | 843.4869  | 2    |
| ARGPLKC         | PKA_R1a | 340 | 346 | 744.4185  | 2    |
| ERVLGPCSD       | PKA_R1a | 355 | 363 | 975.4564  | 1.82 |
| ERVLGPCSDIL     | PKA_R1a | 355 | 365 | 1201.6245 | 1.95 |
| ILKRNIQQYNSF    | PKA_R1a | 364 | 375 | 1523.8329 | 2.44 |
| KRNIQQYNSF      | PKA_R1a | 366 | 375 | 1297.6648 | 2.12 |

| Retention time | Intensity | smAKAP_plus_H2O_1(0.00) | smAKAP_plus_H2O_2(0.00) |
|----------------|-----------|-------------------------|-------------------------|
| 5.09           | 61777     | 1623.6551               | 1623.6313               |
| 5.96           | 12989     | 1855.964                | 1855.8029               |
| 6              | 35923     | 1327.5533               | 1327.5358               |
| 3.84           | 12072     | 1030.1373               | 1029.8837               |
| 5.46           | 142595    | 1214.4019               | 1214.3348               |
| 7.73           | 8051      | 1100.4074               | 1100.3364               |
| 6.69           | 29138     | 802.9622                | 803.0198                |
| 4.36           | 7684      | 1132.4095               | 1132.0996               |
| 6.27           | 270630    | 1279.4869               | 1279.5195               |
| 7.44           | 20214     | 1392.51                 | 1392.1277               |
| 6.27           | 13836     | 1075.1989               | 1075.1286               |
| 5.45           | 13738     | 1330.4493               | 1330.3759               |
| 5.3            | 1812      | 814.8471                | 814.8697                |
| 4.91           | 2369      | 984.921                 | 984.842                 |
| 5.74           | 69670     | 1100.7698               | 1099.2284               |
| 5.27           | 76748     | 986.0894                | 986.045                 |
| 5.24           | 55036     | 976.8437                | 976.8271                |
| 7.08           | 96943     | 1595.5392               | 1595.5304               |
| 9.24           | 2066      | 913.9138                | 914.0201                |
| 5.76           | 19976     | 1546.496                | 1546.3102               |
| 7.06           | 175961    | 1693.6983               | 1693.509                |
| 6.61           | 14563     | 1323.2404               | 1323.2087               |
| 6.93           | 25547     | 954.8391                | 954.7445                |
| 6.62           | 4542      | 1070.0193               | 1069.9411               |
| 7.44           | 66654     | 1169.0322               | 1168.9465               |
| 5.26           | 10873     | 852.7378                | 852.6928                |
| 7.64           | 50215     | 1097.9725               | 1097.8846               |
| 8.5            | 43102     | 1397.3272               | 1397.2119               |
| 9.22           | 1451      | 762.834                 | 762.7913                |
| 5.98           | 27204     | 1134.209                | 1134.189                |
| 7.13           | 200458    | 1011.9335               | 1011.8899               |
| 6.42           | 49509     | 1047.1248               | 1047.1232               |
| 7.66           | 27578     | 907.0568                | 906.993                 |
| 6.87           | 195210    | 759.8188                | 759.8066                |
| 7.28           | 6539      | 1447.5676               | 1447.5549               |
| 6.11           | 35184     | 718.6219                | 718.5698                |
| 8.03           | 1351      | 918.9297                | 918.9009                |
| 7.86           | 1398      | 804.1861                | 803.7553                |
| 7.36           | 76724     | 2219.4705               | 2219.2618               |
| 8.27           | 2992      | 2366.5001               | 2366.3522               |
| 6.74           | 19121     | 1747.8057               | 1747.7613               |
| 6.38           | 20657     | 702.6944                | 702.6198                |
| 5.73           | 14244     | 1478.6029               | 1478.548                |

|      |        |           |           |
|------|--------|-----------|-----------|
| 5.52 | 3790   | 1407.5281 | 1407.487  |
| 6.69 | 14511  | 1176.4058 | 1176.1895 |
| 7.13 | 261994 | 1339.3113 | 1339.2901 |
| 7.99 | 4127   | 1673.091  | 1673.4046 |
| 6.51 | 122086 | 1192.1561 | 1192.116  |
| 7.55 | 8130   | 1525.5558 | 1525.5684 |
| 5.04 | 3564   | 1143.3199 | 1143.3229 |
| 5.56 | 2023   | 1242.3398 | 1242.4987 |
| 4.19 | 29180  | 1030.1548 | 1030.1206 |
| 4.84 | 11210  | 1129.3203 | 1129.2919 |
| 5.09 | 51184  | 943.1142  | 943.0589  |
| 5.09 | 15525  | 843.9872  | 843.9017  |
| 5.09 | 10021  | 744.8005  | 744.7476  |
| 5.69 | 63850  | 975.9352  | 975.9051  |
| 7.89 | 270741 | 1202.2178 | 1202.1835 |
| 6.2  | 81474  | 1524.5727 | 1524.634  |
| 6.29 | 32024  | 1298.2529 | 1302.6753 |

| smAKAP_plus_H2O_3(0.00) | smAKAP_plus_D20_10sec_1(0.17) | smAKAP_plus_D20_10sec_2(0.17) |
|-------------------------|-------------------------------|-------------------------------|
| 1623.6106               | 1629.4372                     | 1629.8832                     |
| 1855.553                | 1861.8118                     | 1863.2039                     |
| 1327.4737               | 1327.7947                     | 1328.3368                     |
| 1029.9126               | 1029.9288                     | 1030.4023                     |
| 1214.3198               | 1214.6593                     | 1214.9669                     |
| 1100.3581               | 1100.393                      | 1100.5438                     |
| 802.9506                | 803.1643                      | 803.1378                      |
| 1132.0891               | 1132.8932                     | 1133.184                      |
| 1279.4288               | 1280.5123                     | 1280.6794                     |
| 1392.3391               | 1393.3637                     | 1393.2941                     |
| 1075.1759               | 1075.9619                     | 1075.9547                     |
| 1330.2198               | 1332.3518                     | 1332.6541                     |
| 814.9246                | 815.547                       | 815.8612                      |
| 984.8503                | 987.8936                      | 987.9859                      |
| 1099.205                | 1100.5156                     | 1100.5937                     |
| 986.0434                | 987.2114                      | 987.2594                      |
| 976.8023                | 977.3884                      | 977.469                       |
| 1595.5041               | 1595.9343                     | 1596.213                      |
| 913.9306                | 914.0587                      | 914.0001                      |
| 1546.3697               | 1547.3497                     | 1547.7229                     |
| 1693.4806               | 1694.8419                     | 1694.9296                     |
| 1323.1259               | 1323.9588                     | 1324.1231                     |
| 954.7337                | 955.0356                      | 955.1813                      |
| 1069.9282               | 1070.2916                     | 1070.2888                     |
| 1168.935                | 1169.2818                     | 1169.3737                     |
| 852.6764                | 853.2028                      | 853.1575                      |
| 1097.8666               | 1098.7028                     | 1098.7933                     |
| 1397.1979               | 1398.1486                     | 1398.2146                     |
| 762.7674                | 762.9802                      | 762.9991                      |
| 1134.189                | 1134.7818                     | 1134.8164                     |
| 1011.8958               | 1012.1234                     | 1012.2404                     |
| 1047.1014               | 1048.0804                     | 1047.9883                     |
| 906.9769                | 908.0996                      | 908.1818                      |
| 759.7975                | 760.7284                      | 760.8164                      |
| 1447.5337               | 1447.924                      | 1448.8111                     |
| 718.5686                | 718.8292                      | 718.8719                      |
| 918.7649                | 919.1123                      | 918.8557                      |
| 803.6615                | 804.7995                      | 804.5886                      |
| 2219.2056               | 2220.1139                     | 2220.4085                     |
| 2366.3818               | 2366.7158                     | 2366.6049                     |
| 1747.734                | 1748.405                      | 1748.5541                     |
| 702.5993                | 702.8751                      | 702.9328                      |
| 1478.5523               | 1480.3947                     | 1480.4111                     |

|           |           |           |
|-----------|-----------|-----------|
| 1407.4898 | 1409.3326 | 1409.7353 |
| 1176.2343 | 1176.9513 | 1177.2443 |
| 1339.2693 | 1339.8514 | 1339.9177 |
| 1673.1187 | 1673.6001 | 1673.7094 |
| 1192.1199 | 1192.5757 | 1192.6002 |
| 1525.5672 | 1526.1201 | 1526.1144 |
| 1143.3323 | 1144.2508 | 1144.4343 |
| 1242.4482 | 1243.0364 | 1243.093  |
| 1030.1047 | 1030.8331 | 1030.8546 |
| 1129.2968 | 1129.9295 | 1129.8798 |
| 943.0441  | 943.3612  | 943.4555  |
| 843.8833  | 844.1934  | 843.8555  |
| 744.7773  | 744.9674  | 745.0085  |
| 975.9132  | 976.6656  | 976.7076  |
| 1202.1899 | 1202.8031 | 1202.895  |
| 1524.638  | 1526.7724 | 1526.5428 |
| 1302.6753 | 1299.9569 | 1299.8663 |

| smAKAP_plus_D20_10sec_3(0.17) | smAKAP_plus_D20_1min_1(1.00) |
|-------------------------------|------------------------------|
| 1629.7644                     | 1631.2297                    |
| 1861.7811                     | 1864.0784                    |
| 1328.0174                     | 1328.7843                    |
| 1030.1358                     | 1030.6524                    |
| 1214.7332                     | 1214.9513                    |
| 1100.5827                     | 1100.5331                    |
| 803.0575                      | 803.1697                     |
| 1132.8557                     | 1132.8102                    |
| 1280.3237                     | 1280.3842                    |
| 1393.3289                     | 1393.0839                    |
| 1075.7735                     | 1075.8316                    |
| 1332.2389                     | 1333.305                     |
| 815.6296                      | 816.7909                     |
| 987.7898                      | 988.7435                     |
| 1100.1974                     | 1101.5303                    |
| 987.091                       | 988.0497                     |
| 977.3166                      | 977.7144                     |
| 1596.0904                     | 1596.55                      |
| 914.2753                      | 914.266                      |
| 1547.267                      | 1548.701                     |
| 1694.9238                     | 1695.918                     |
| 1323.9777                     | 1324.5849                    |
| 955.0291                      | 955.1586                     |
| 1070.2231                     | 1070.2754                    |
| 1169.2633                     | 1169.3736                    |
| 853.2066                      | 853.4672                     |
| 1098.6628                     | 1099.4637                    |
| 1398.1123                     | 1398.8102                    |
| 762.9792                      | 763.0096                     |
| 1134.699                      | 1135.2281                    |
| 1012.1894                     | 1012.1843                    |
| 1047.4004                     | 1048.53                      |
| 907.9748                      | 908.5794                     |
| 760.6352                      | 761.187                      |
| 1448.1928                     | 1448.9395                    |
| 718.8114                      | 718.8742                     |
| 919.1601                      | 919.3534                     |
| 804.9021                      | 804.3012                     |
| 2220.2112                     | 2220.6299                    |
| 2366.494                      | 2365.8174                    |
| 1748.3335                     | 1748.8516                    |
| 702.9304                      | 703.0066                     |
| 1480.0585                     | 1481.2973                    |



|           |           |
|-----------|-----------|
| 1409.0235 | 1409.8029 |
| 1176.9824 | 1177.4814 |
| 1339.8323 | 1340.237  |
| 1673.9542 | 1673.8247 |
| 1192.5489 | 1192.7131 |
| 1526.0271 | 1526.2027 |
| 1144.1172 | 1144.5261 |
| 1242.8794 | 1243.5403 |
| 1030.7173 | 1030.9598 |
| 1129.8182 | 1130.1446 |
| 943.3626  | 943.4432  |
| 844.2557  | 844.2771  |
| 745.0009  | 744.953   |
| 976.5794  | 976.9452  |
| 1202.7796 | 1203.2698 |
| 1526.3709 | 1527.474  |
| 1299.7983 | 1300.6128 |

| smAKAP_plus_D20_1min_2(1.00) | smAKAP_plus_D20_1min_3(1.00) |
|------------------------------|------------------------------|
| 1630.7909                    | 1630.7853                    |
| 1864.0943                    | 1864.08635                   |
| 1327.8164                    | 1328.0256                    |
| 1030.277                     | 1030.1772                    |
| 1214.6719                    | 1214.8644                    |
| 1100.4711                    | 1100.3356                    |
| 803.0997                     | 803.0835                     |
| 1132.5132                    | 1132.9523                    |
| 1280.0056                    | 1280.1616                    |
| 1392.6116                    | 1393.2201                    |
| 1075.5687                    | 1075.6131                    |
| 1331.4501                    | 1333.5027                    |
| 816.3814                     | 816.4127                     |
| 987.8075                     | 988.5978                     |
| 1101.1913                    | 1101.395                     |
| 987.8192                     | 987.9304                     |
| 977.6288                     | 977.6625                     |
| 1596.9852                    | 1596.4635                    |
| 914.3386                     | 914.1588                     |
| 1547.8368                    | 1548.3256                    |
| 1695.4191                    | 1695.9642                    |
| 1324.4725                    | 1324.6604                    |
| 955.1334                     | 955.1703                     |
| 1070.2774                    | 1070.3761                    |
| 1169.3515                    | 1169.3629                    |
| 853.4603                     | 853.4618                     |
| 1099.3933                    | 1099.4806                    |
| 1398.6183                    | 1399.0223                    |
| 763.0507                     | 763.036                      |
| 1135.149                     | 1135.1358                    |
| 1012.2175                    | 1012.2409                    |
| 1048.5138                    | 1048.4965                    |
| 908.4823                     | 908.509                      |
| 761.0984                     | 761.1309                     |
| 1448.2815                    | 1449.2465                    |
| 718.8902                     | 718.8721                     |
| 919.1573                     | 919.2972                     |
| 804.3461                     | 804.2248                     |
| 2220.7628                    | 2220.9573                    |
| 2365.8174                    | 2365.8174                    |
| 1748.8436                    | 1748.8842                    |
| 702.9696                     | 702.978                      |
| 1481.089                     | 1480.9021                    |

|           |           |
|-----------|-----------|
| 1410.1362 | 1410.2455 |
| 1177.4598 | 1177.4594 |
| 1340.2012 | 1340.2139 |
| 1674.6239 | 1674.6248 |
| 1192.6957 | 1192.6955 |
| 1526.1407 | 1526.1363 |
| 1144.3108 | 1144.5906 |
| 1242.743  | 1243.2209 |
| 1030.9187 | 1030.8694 |
| 1130.0545 | 1130.0198 |
| 943.4186  | 943.4334  |
| 844.2716  | 844.2417  |
| 744.9486  | 745.0882  |
| 976.8777  | 976.8567  |
| 1203.2026 | 1203.2381 |
| 1527.3907 | 1527.1478 |
| 1300.6499 | 1300.5856 |

smAKAP\_plus\_D20\_10min\_1(10.00)

smAKAP\_plus\_D20\_10min\_2(10.00)

|           |           |
|-----------|-----------|
| 1632.0932 | 1632.2956 |
| 1866.2056 | 1865.6573 |
| 1328.9026 | 1328.6091 |
| 1030.241  | 1030.241  |
| 1215.503  | 1215.6318 |
| 1101.5392 | 1100.307  |
| 803.0115  | 802.8874  |
| 1133.7032 | 1133.0916 |
| 1280.9467 | 1280.9042 |
| 1393.8214 | 1393.8214 |
| 1076.2976 | 1076.0782 |
| 1335.9972 | 1333.0694 |
| 816.9909  | 816.6116  |
| 989.0291  | 989.4447  |
| 1101.8777 | 1101.8288 |
| 988.8607  | 988.8168  |
| 978.2482  | 978.2174  |
| 1597.573  | 1597.3274 |
| 914.4315  | 914.3643  |
| 1549.505  | 1549.505  |
| 1697.1903 | 1696.953  |
| 1325.4488 | 1325.4385 |
| 955.4915  | 955.4591  |
| 1070.6493 | 1070.5074 |
| 1169.7351 | 1169.6941 |
| 853.7372  | 853.618   |
| 1101.2621 | 1101.1851 |
| 1401.1467 | 1401.0525 |
| 763.5048  | 763.2619  |
| 1136.3458 | 1136.3443 |
| 1012.4824 | 1012.4257 |
| 1049.1151 | 1049.124  |
| 909.4543  | 909.3874  |
| 761.6383  | 761.6039  |
| 1449.8795 | 1449.3525 |
| 719.031   | 718.9839  |
| 919.5733  | 919.3953  |
| 804.7166  | 804.7057  |
| 2221.9987 | 2222.1625 |
| 2369.2939 | 2369.2939 |
| 1749.6245 | 1749.57   |
| 703.5147  | 703.5242  |
| 1481.8422 | 1481.7186 |

1410.7329  
1177.5971  
1340.3952  
1674.9933  
1192.7682  
1526.4465  
1145.4238  
1243.7916  
1031.5389  
1130.5981  
943.4447  
844.2178  
745.0463  
977.7641  
1204.6881  
1529.6452  
1302.6753

1410.7022  
1177.6466  
1340.3816  
1674.8584  
1192.7739  
1526.4681  
1144.7147  
1243.8959  
1031.499  
1130.5907  
943.4418  
844.1926  
744.9686  
977.7088  
1204.6285  
1529.5294  
1302.5474

| smAKAP_plus_D20_10min_3(10.00) | smAKAP_plus_D20_1hr_1(60.00) |
|--------------------------------|------------------------------|
| 1631.9741                      | 1632.0706                    |
| 1866.8389                      | 1866.1349                    |
| 1328.5424                      | 1330.1418                    |
| 1030.1346                      | 1031.2498                    |
| 1215.6115                      | 1215.6294                    |
| 1100.3242                      | 1100.5385                    |
| 802.7886                       | 803.2519                     |
| 1132.48                        | 1134.7134                    |
| 1282.1566                      | 1282.1425                    |
| 1393.8214                      | 1394.4809                    |
| 1075.7341                      | 1076.1933                    |
| 1330.1416                      | 1336.5585                    |
| 816.8477                       | 816.8841                     |
| 989.2369                       | 988.0364                     |
| 1102.4562                      | 1102.7287                    |
| 988.6142                       | 988.9586                     |
| 978.1629                       | 978.3729                     |
| 1597.3332                      | 1597.9565                    |
| 914.3279                       | 914.345                      |
| 1549.505                       | 1552.291                     |
| 1696.7551                      | 1697.7635                    |
| 1325.4926                      | 1326.5111                    |
| 955.4361                       | 955.8336                     |
| 1070.4008                      | 1070.9182                    |
| 1169.6565                      | 1170.1131                    |
| 853.5997                       | 853.7598                     |
| 1101.0626                      | 1101.95                      |
| 1400.534                       | 1402.7796                    |
| 763.3123                       | 764.333                      |
| 1136.0783                      | 1137.4075                    |
| 1012.5041                      | 1012.6088                    |
| 1048.8979                      | 1049.2841                    |
| 909.1273                       | 909.777                      |
| 761.488                        | 761.9838                     |
| 1449.616                       | 1449.9877                    |
| 718.9589                       | 719.5177                     |
| 919.0048                       | 919.574                      |
| 804.7987                       | 804.697                      |
| 2221.5179                      | 2222.6902                    |
| 2369.2939                      | 2369.8195                    |
| 1749.4043                      | 1749.8385                    |
| 703.3222                       | 703.6401                     |
| 1481.0695                      | 1481.8457                    |

|           |           |
|-----------|-----------|
| 1411.4005 | 1411.0177 |
| 1177.7007 | 1178.2137 |
| 1340.3239 | 1340.5634 |
| 1674.1221 | 1674.993  |
| 1192.7255 | 1192.9737 |
| 1526.219  | 1526.6916 |
| 1145.1901 | 1146.0059 |
| 1243.5615 | 1244.2316 |
| 1031.2579 | 1031.9901 |
| 1130.3393 | 1131.116  |
| 943.5122  | 943.6292  |
| 844.214   | 844.2368  |
| 744.9588  | 745.1579  |
| 977.5523  | 978.2433  |
| 1204.4539 | 1205.3661 |
| 1528.98   | 1530.5145 |
| 1301.4916 | 1303.2861 |

| smAKAP_plus_D20_1hr_2(60.00) | smAKAP_plus_D20_1hr_3(60.00) |
|------------------------------|------------------------------|
| 1632.2747                    | 1632.3099                    |
| 1865.81275                   | 1865.4906                    |
| 1328.021                     | 1329.4293                    |
| 1030.3661                    | 1032.5833                    |
| 1214.9255                    | 1215.8396                    |
| 1100.4011                    | 1100.6592                    |
| 802.9712                     | 803.0616                     |
| 1132.2503                    | 1133.48185                   |
| 1280.1119                    | 1281.7929                    |
| 1392.7249                    | 1394.3248                    |
| 1075.7052                    | 1076.4954                    |
| 1336.7916                    | 1336.601                     |
| 816.9618                     | 815.9807                     |
| 989.0066                     | 989.3814                     |
| 1102.5033                    | 1104.0626                    |
| 988.741                      | 989.7753                     |
| 978.3316                     | 978.4317                     |
| 1597.6925                    | 1597.5747                    |
| 914.308                      | 914.7185                     |
| 1552.291                     | 1552.291                     |
| 1697.9897                    | 1698.5366                    |
| 1326.1929                    | 1327.0511                    |
| 955.7884                     | 956.2486                     |
| 1070.5024                    | 1071.4367                    |
| 1170.034                     | 1170.4973                    |
| 854.0515                     | 854.3033                     |
| 1101.9554                    | 1102.9462                    |
| 1402.588                     | 1403.3154                    |
| 764.4101                     | 765.3101                     |
| 1137.4593                    | 1139.313                     |
| 1012.7175                    | 1013.2678                    |
| 1049.5797                    | 1050.3531                    |
| 909.7869                     | 910.4826                     |
| 761.9625                     | 762.9027                     |
| 1449.8687                    | 1453.1495                    |
| 719.4694                     | 721.625                      |
| 919.5855                     | 920.1093                     |
| 804.3991                     | 804.7031                     |
| 2223.1307                    | 2224.3224                    |
| 2369.8195                    | 2369.8195                    |
| 1749.8197                    | 1751.0913                    |
| 703.5133                     | 703.9858                     |
| 1482.1621                    | 1482.1853                    |



|           |            |
|-----------|------------|
| 1411.0218 | 1411.1732  |
| 1177.97   | 1178.4141  |
| 1340.6101 | 1341.3272  |
| 1675.0418 | 1674.508   |
| 1193.0012 | 1193.7374  |
| 1526.7232 | 1527.4061  |
| 1146.2234 | 1147.0654  |
| 1244.6679 | 1245.9338  |
| 1032.0189 | 1033.4749  |
| 1130.9404 | 1132.3653  |
| 943.5476  | 944.282    |
| 844.2855  | 845.0215   |
| 745.0151  | 745.8486   |
| 978.3194  | 979.1285   |
| 1205.3039 | 1206.2149  |
| 1530.8414 | 1531.378   |
| 1303.2758 | 1303.28095 |

| smAKAP_plus_D20_4hr_1(240.00) | smAKAP_plus_D20_4hr_2(240.00) |
|-------------------------------|-------------------------------|
| 1632.4161                     | 1632.1055                     |
| 1867.4267                     | 1866.5932                     |
| 1329.9894                     | 1329.6698                     |
| 1030.433                      | 1031.2901                     |
| 1216.7962                     | 1216.2876                     |
| 1100.3927                     | 1100.8712                     |
| 803.1009                      | 803.1279                      |
| 1133.8398                     | 1133.8312                     |
| 1282.9887                     | 1282.5653                     |
| 1392.8158                     | 1392.8158                     |
| 1076.253                      | 1076.2556                     |
| 1336.5482                     | 1335.7116                     |
| 816.7903                      | 816.8857                      |
| 989.5022                      | 989.363                       |
| 1103.4348                     | 1103.4844                     |
| 989.2743                      | 989.1746                      |
| 978.388                       | 978.3628                      |
| 1598.1126                     | 1598.094                      |
| 914.3708                      | 914.2437                      |
| 1551.2064                     | 1551.2064                     |
| 1698.787                      | 1697.9757                     |
| 1326.8433                     | 1326.8006                     |
| 956.0665                      | 955.9251                      |
| 1071.1145                     | 1071.1276                     |
| 1170.2873                     | 1170.073                      |
| 854.5138                      | 854.1979                      |
| 1102.7193                     | 1102.6108                     |
| 1403.771                      | 1403.8219                     |
| 765.3222                      | 764.742                       |
| 1138.3319                     | 1138.1362                     |
| 1013.2292                     | 1013.1182                     |
| 1049.815                      | 1049.6955                     |
| 910.5111                      | 910.4395                      |
| 762.5294                      | 762.4716                      |
| 1451.1233                     | 1450.6798                     |
| 720.2967                      | 720.1221                      |
| 919.9156                      | 919.8365                      |
| 804.4656                      | 804.6996                      |
| 2224.2166                     | 2224.2401                     |
| 2371.4775                     | 2371.4775                     |
| 1750.7114                     | 1750.4891                     |
| 703.7939                      | 703.74                        |
| 1482.4889                     | 1482.4706                     |

|           |           |
|-----------|-----------|
| 1411.0552 | 1411.0843 |
| 1178.5394 | 1178.6029 |
| 1341.0057 | 1340.9363 |
| 1675.2682 | 1676.1183 |
| 1193.3879 | 1193.3315 |
| 1527.1319 | 1527.1651 |
| 1146.7099 | 1146.6615 |
| 1245.7817 | 1245.5905 |
| 1032.7098 | 1032.5918 |
| 1131.8419 | 1131.5762 |
| 943.9581  | 943.9008  |
| 844.5632  | 844.5019  |
| 745.4973  | 745.4278  |
| 978.643   | 978.5704  |
| 1205.9097 | 1205.756  |
| 1531.1716 | 1531.0761 |
| 1303.8849 | 1303.4445 |

| smAKAP_plus_D20_4hr_3(240.00) | PKA_R1a_H2O_2(0.00) | PKA_R1a_H2O_3(0.00) |
|-------------------------------|---------------------|---------------------|
| 1632.3434                     | 1623.5594           | 1623.6052           |
| 1866.4589                     | 1855.864            | 1855.8718           |
| 1329.688                      | 1327.4531           | 1327.4176           |
| 1030.433                      | 1030.0833           | 1030.1086           |
| 1216.0267                     | 1214.2539           | 1214.3674           |
| 1100.5026                     | 1100.2394           | 1100.3331           |
| 802.8823                      | 802.7928            | 802.8896            |
| 1133.8355                     | 1132.3649           | 1132.3021           |
| 1283.0412                     | 1279.3413           | 1279.393            |
| 1393.0698                     | 1392.5673           | 1392.5496           |
| 1076.2093                     | 1075.1656           | 1075.2145           |
| 1336.6758                     | 1330.3965           | 1330.421            |
| 817.0207                      | 814.865             | 814.9047            |
| 989.4313                      | 984.8562            | 984.9595            |
| 1103.3803                     | 1099.2134           | 1099.1812           |
| 989.1951                      | 986.0535            | 986.1104            |
| 978.4305                      | 976.8046            | 976.875             |
| 1598.0594                     | 1595.5394           | 1595.4162           |
| 914.3573                      | 913.8122            | 913.8744            |
| 1551.2064                     | 1546.3956           | 1546.3745           |
| 1698.4484                     | 1693.513            | 1693.6777           |
| 1326.6905                     | 1323.1635           | 1323.2155           |
| 955.9077                      | 954.754             | 954.8616            |
| 1070.8104                     | 1069.925            | 1069.9476           |
| 1170.1647                     | 1168.9544           | 1169.0253           |
| 854.2586                      | 852.6871            | 852.7655            |
| 1102.5892                     | 1097.8753           | 1097.925            |
| 1403.3565                     | 1397.2357           | 1397.3267           |
| 764.9309                      | 762.7794            | 762.8871            |
| 1138.1968                     | 1134.1676           | 1134.2666           |
| 1013.1225                     | 1011.8657           | 1011.9088           |
| 1049.897                      | 1047.1035           | 1047.2359           |
| 910.424                       | 906.9839            | 907.0495            |
| 762.5159                      | 759.8092            | 759.8196            |
| 1450.8569                     | 1447.5568           | 1447.5726           |
| 720.1042                      | 718.5766            | 718.6484            |
| 919.9233                      | 918.8682            | 918.9699            |
| 804.7332                      | 803.7737            | 803.6904            |
| 2224.2471                     | 2219.254            | 2219.2574           |
| 2371.4775                     | 2366.3925           | 2366.3856           |
| 1750.4209                     | 1747.7158           | 1747.745            |
| 703.6876                      | 702.6167            | 702.6827            |
| 1482.501                      | 1478.5431           | 1478.5003           |

|           |           |           |
|-----------|-----------|-----------|
| 1410.9157 | 1407.4555 | 1407.6025 |
| 1178.3121 | 1176.2065 | 1176.2915 |
| 1340.9452 | 1339.2806 | 1339.3108 |
| 1675.277  | 1672.7593 | 1672.7588 |
| 1193.3058 | 1192.1261 | 1192.195  |
| 1527.1078 | 1525.5521 | 1525.6022 |
| 1146.6108 | 1143.3241 | 1143.2133 |
| 1245.4746 | 1242.432  | 1242.449  |
| 1032.5476 | 1030.1    | 1030.158  |
| 1131.5339 | 1129.2856 | 1129.2478 |
| 943.8951  | 943.0566  | 943.0882  |
| 844.5415  | 843.9477  | 843.9817  |
| 745.4437  | 744.8025  | 744.7981  |
| 978.6102  | 975.8841  | 975.9472  |
| 1205.7878 | 1202.1875 | 1202.2337 |
| 1531.3233 | 1524.6375 | 1524.6421 |
| 1303.1775 | 1298.1018 | 1298.2457 |

| PKA_RIa_H20_4(0.00) | PKA_RIa_D20_10sec_1(0.17) | PKA_RIa_D20_10sec_2(0.17) |
|---------------------|---------------------------|---------------------------|
| 1623.6178           | 1630.7325                 | 1630.031                  |
| 1855.851            | 1864.3972                 | 1863.6359                 |
| 1327.5326           | 1328.5104                 | 1328.3469                 |
| 1030.1202           | 1030.6071                 | 1030.0997                 |
| 1214.3403           | 1215.1133                 | 1215.1101                 |
| 1100.9454           | 1100.5408                 | 1100.5046                 |
| 802.934             | 803.011                   | 802.964                   |
| 1132.3372           | 1133.5686                 | 1133.4699                 |
| 1279.3954           | 1280.7                    | 1280.5178                 |
| 1392.55845          | 1393.8112                 | 1393.6691                 |
| 1075.1967           | 1076.1746                 | 1076.0569                 |
| 1330.4029           | 1333.0532                 | 1332.9852                 |
| 814.6954            | 815.8603                  | 815.8603                  |
| 984.7251            | 987.9968                  | 987.3098                  |
| 1099.2838           | 1100.6175                 | 1100.4794                 |
| 986.115             | 987.2782                  | 987.1143                  |
| 976.8625            | 977.5457                  | 977.4342                  |
| 1595.4531           | 1596.2651                 | 1596.0258                 |
| 913.717             | 914.0543                  | 913.9601                  |
| 1546.38505          | 1548.1002                 | 1548.0345                 |
| 1693.59535          | 1695.1979                 | 1695.01                   |
| 1322.9798           | 1324.2181                 | 1324.1453                 |
| 954.8753            | 955.1606                  | 955.0354                  |
| 1069.7719           | 1070.4213                 | 1070.2702                 |
| 1168.98985          | 1169.4428                 | 1169.3391                 |
| 852.7819            | 853.312                   | 853.2392                  |
| 1097.90015          | 1098.7757                 | 1098.5599                 |
| 1397.3828           | 1398.2551                 | 1398.0944                 |
| 762.7213            | 763.0128                  | 762.963                   |
| 1134.2406           | 1134.8831                 | 1134.8711                 |
| 1011.88725          | 1012.161                  | 1012.1506                 |
| 1047.157            | 1047.9616                 | 1048.0184                 |
| 906.9047            | 908.1826                  | 907.9517                  |
| 759.8344            | 760.8263                  | 760.6451                  |
| 1447.5647           | 1447.7388                 | 1448.3769                 |
| 718.6408            | 718.918                   | 718.8546                  |
| 918.91905           | 918.8808                  | 918.8864                  |
| 803.73205           | 804.7184                  | 803.9865                  |
| 2220.4424           | 2220.3769                 | 2220.0965                 |
| 2365.768            | 2367.5871                 | 2367.0177                 |
| 1747.8353           | 1748.475                  | 1748.4119                 |
| 702.7109            | 702.9572                  | 702.8358                  |
| 1478.5152           | 1480.6088                 | 1480.2669                 |

|            |           |           |
|------------|-----------|-----------|
| 1407.2686  | 1409.8822 | 1409.1479 |
| 1176.2749  | 1177.0938 | 1176.8716 |
| 1339.2957  | 1339.885  | 1339.7953 |
| 1672.75905 | 1673.3462 | 1673.1691 |
| 1192.2056  | 1192.6211 | 1192.5318 |
| 1525.2088  | 1526.0867 | 1525.9382 |
| 1143.0372  | 1144.4217 | 1143.9806 |
| 1242.1219  | 1243.1461 | 1242.753  |
| 1030.1568  | 1030.8235 | 1030.7272 |
| 1129.2072  | 1129.899  | 1129.784  |
| 943.0987   | 943.4169  | 943.2465  |
| 843.977    | 844.1565  | 844.111   |
| 744.7848   | 745.0767  | 744.9386  |
| 975.9994   | 976.768   | 976.637   |
| 1202.2106  | 1202.9152 | 1202.7948 |
| 1524.7109  | 1526.7531 | 1526.5887 |
| 1297.9579  | 1299.9239 | 1299.5505 |

| PKA_Rla_D20_10sec_3(0.17) | PKA_Rla_D20_1min_1(1.00) | PKA_Rla_D20_1min_2(1.00) |
|---------------------------|--------------------------|--------------------------|
| 1629.2998                 | 1631.3075                | 1629.9867                |
| 1862.8768                 | 1865.8167                | 1865.3032                |
| 1328.2616                 | 1329.5654                | 1329.4041                |
| 1030.402                  | 1031.05655               | 1031.0859                |
| 1214.9655                 | 1215.879                 | 1215.7416                |
| 1100.4609                 | 1100.587                 | 1100.4774                |
| 802.9939                  | 803.0449                 | 802.998                  |
| 1133.2127                 | 1133.797                 | 1133.8617                |
| 1280.4263                 | 1280.9351                | 1280.737                 |
| 1393.4898                 | 1394.0103                | 1393.8724                |
| 1075.9914                 | 1076.2901                | 1076.119                 |
| 1332.6623                 | 1334.1748                | 1333.7315                |
| 815.8603                  | 816.6963                 | 816.2239                 |
| 987.4656                  | 988.997                  | 988.997                  |
| 1100.2652                 | 1101.4847                | 1101.098                 |
| 986.9359                  | 987.9796                 | 987.6835                 |
| 977.3727                  | 977.8732                 | 977.704                  |
| 1596.0803                 | 1596.6323                | 1596.3856                |
| 913.8192                  | 914.4285                 | 914.2062                 |
| 1547.1559                 | 1549.2256                | 1549.2256                |
| 1694.7912                 | 1696.0068                | 1695.6949                |
| 1323.9135                 | 1324.8326                | 1324.605                 |
| 955.0632                  | 955.2073                 | 955.1588                 |
| 1070.1802                 | 1070.4888                | 1070.1577                |
| 1169.3406                 | 1169.4913                | 1169.3098                |
| 853.211                   | 853.5448                 | 853.4324                 |
| 1098.5112                 | 1099.3819                | 1099.0072                |
| 1398.0452                 | 1399.0224                | 1398.0182                |
| 762.8344                  | 763.0692                 | 762.8329                 |
| 1134.7396                 | 1135.1752                | 1135.0833                |
| 1012.1746                 | 1012.2135                | 1012.1941                |
| 1048.0736                 | 1048.5239                | 1047.9644                |
| 907.8086                  | 908.5912                 | 908.2783                 |
| 760.5331                  | 761.1561                 | 760.9867                 |
| 1447.9544                 | 1448.3427                | 1448.3744                |
| 718.8461                  | 718.9755                 | 718.885                  |
| 918.9229                  | 919.1594                 | 919.1594                 |
| 803.7472                  | 804.2238                 | 804.3003                 |
| 2220.0087                 | 2220.9233                | 2220.3398                |
| 2367.3024                 | 2366.7651                | 2366.7651                |
| 1748.3342                 | 1748.9757                | 1748.7671                |
| 702.8482                  | 703.0826                 | 702.9862                 |
| 1480.0132                 | 1481.1487                | 1480.989                 |



|            |           |           |
|------------|-----------|-----------|
| 1409.51505 | 1410.3597 | 1409.5457 |
| 1176.7302  | 1177.3995 | 1177.2994 |
| 1339.7319  | 1340.1419 | 1340.0718 |
| 1673.1787  | 1673.6975 | 1673.0737 |
| 1192.5261  | 1192.6852 | 1192.643  |
| 1525.9405  | 1534.6349 | 1525.9542 |
| 1143.778   | 1144.7013 | 1144.2224 |
| 1242.94955 | 1242.9717 | 1242.9717 |
| 1030.6106  | 1030.9649 | 1030.7682 |
| 1129.6732  | 1129.9402 | 1129.7619 |
| 943.2635   | 943.4397  | 943.3659  |
| 844.0891   | 844.1639  | 844.1503  |
| 744.9357   | 745.0916  | 744.9789  |
| 976.5561   | 976.9948  | 976.7958  |
| 1202.7446  | 1203.3378 | 1203.1236 |
| 1526.3424  | 1527.2944 | 1526.885  |
| 1299.4491  | 1300.5948 | 1300.1637 |

| PKA_RIa_D20_1min_3(1.00) | PKA_RIa_D20_10min_1(10.00) | PKA_RIa_D20_10min_2(10.00) |
|--------------------------|----------------------------|----------------------------|
| 1630.3371                | 1632.3478                  | 1631.2989                  |
| 1863.8433                | 1866.8189                  | 1866.5992                  |
| 1329.1367                | 1331.6514                  | 1331.2802                  |
| 1031.0272                | 1032.4451                  | 1032.1347                  |
| 1215.7656                | 1217.2745                  | 1216.9853                  |
| 1100.3141                | 1101.2602                  | 1101.1612                  |
| 802.8397                 | 803.1643                   | 803.2823                   |
| 1133.6956                | 1135.0336                  | 1134.5427                  |
| 1280.6803                | 1281.8721                  | 1281.6338                  |
| 1393.6688                | 1394.9347                  | 1394.7173                  |
| 1076.1628                | 1077.0876                  | 1076.9164                  |
| 1333.9839                | 1336.1689                  | 1335.5026                  |
| 816.4601                 | 817.2453                   | 816.8601                   |
| 988.997                  | 989.3712                   | 989.0904                   |
| 1101.1411                | 1102.6706                  | 1102.3618                  |
| 987.7832                 | 988.9445                   | 988.6286                   |
| 977.4967                 | 978.3375                   | 978.3488                   |
| 1596.0494                | 1597.7406                  | 1597.5398                  |
| 913.8491                 | 914.4423                   | 914.241                    |
| 1549.2256                | 1550.0899                  | 1550.09875                 |
| 1695.85085               | 1697.3064                  | 1696.8456                  |
| 1324.7188                | 1325.7546                  | 1325.6286                  |
| 954.9055                 | 955.5026                   | 955.5472                   |
| 1069.8437                | 1070.6617                  | 1070.5445                  |
| 1169.1772                | 1169.7533                  | 1169.7926                  |
| 853.2724                 | 853.742                    | 853.6879                   |
| 1098.9583                | 1101.1901                  | 1100.8095                  |
| 1398.4848                | 1401.2349                  | 1401.0638                  |
| 762.95105                | 763.3957                   | 763.1497                   |
| 1134.949                 | 1136.3289                  | 1136.0798                  |
| 1012.0798                | 1012.4496                  | 1012.4676                  |
| 1048.329                 | 1048.91                    | 1051.8509                  |
| 908.2705                 | 909.5284                   | 909.1975                   |
| 760.931                  | 761.6967                   | 761.5252                   |
| 1448.35855               | 1450.3521                  | 1450.0625                  |
| 718.7355                 | 719.0318                   | 719.0798                   |
| 919.1594                 | 919.6027                   | 919.469                    |
| 804.26205                | 804.5468                   | 804.342                    |
| 2220.3546                | 2222.356                   | 2221.9165                  |
| 2366.7651                | 2369.0453                  | 2368.84085                 |
| 1748.402                 | 1749.7568                  | 1749.604                   |
| 702.7815                 | 703.4701                   | 703.3844                   |
| 1480.3324                | 1482.0928                  | 1481.6963                  |

|            |           |           |
|------------|-----------|-----------|
| 1409.2193  | 1411.2744 | 1411.5452 |
| 1176.9187  | 1177.7175 | 1178.0554 |
| 1340.0148  | 1340.4082 | 1340.2751 |
| 1673.2722  | 1674.1268 | 1673.6448 |
| 1192.5603  | 1192.7744 | 1192.6913 |
| 1525.9225  | 1526.392  | 1526.0523 |
| 1144.46185 | 1145.2258 | 1145.1025 |
| 1242.9717  | 1243.7424 | 1243.5757 |
| 1030.8428  | 1031.5552 | 1031.333  |
| 1129.7284  | 1130.5699 | 1130.3502 |
| 943.1891   | 943.4223  | 943.5187  |
| 843.9982   | 844.2416  | 844.1005  |
| 744.8713   | 745.0787  | 745.0449  |
| 976.6745   | 977.7713  | 977.5943  |
| 1202.8595  | 1204.672  | 1204.5377 |
| 1527.0113  | 1529.5682 | 1529.0331 |
| 1300.37925 | 1302.4932 | 1301.7179 |

| PKA_RIa_D20_10min_3(10.00) | PKA_RIa_D20_1hr_1(60.00) | PKA_RIa_D20_1hr_2(60.00) |
|----------------------------|--------------------------|--------------------------|
| 1631.3943                  | 1632.1786                | 1632.1943                |
| 1865.6343                  | 1866.8067                | 1865.725                 |
| 1331.4637                  | 1332.0648                | 1332.0097                |
| 1032.3814                  | 1032.5659                | 1032.1756                |
| 1217.4195                  | 1217.4769                | 1218.4752                |
| 1101.421                   | 1102.601                 | 1102.7258                |
| 803.2769                   | 803.8311                 | 804.1718                 |
| 1135.0922                  | 1135.5006                | 1135.47475               |
| 1281.8992                  | 1282.3171                | 1282.6233                |
| 1394.9055                  | 1395.3558                | 1395.6999                |
| 1077.1235                  | 1077.5495                | 1077.7037                |
| 1335.9956                  | 1337.1416                | 1336.8535                |
| 815.2566                   | 817.0761                 | 817.0761                 |
| 988.8967                   | 989.2298                 | 989.32955                |
| 1102.4521                  | 1102.9933                | 1103.2066                |
| 988.8581                   | 989.1037                 | 989.32705                |
| 978.2548                   | 978.5848                 | 978.8837                 |
| 1597.1531                  | 1598.3479                | 1597.4828                |
| 914.4283                   | 914.5389                 | 914.5868                 |
| 1550.1076                  | 1551.3239                | 1550.5758                |
| 1696.8205                  | 1698.4226                | 1697.8718                |
| 1325.6316                  | 1326.7294                | 1326.2761                |
| 955.4849                   | 956.1072                 | 955.8455                 |
| 1070.6668                  | 1071.2787                | 1070.9616                |
| 1169.7002                  | 1170.3678                | 1170.1164                |
| 853.731                    | 854.0424                 | 854.4084                 |
| 1101.1142                  | 1102.1838                | 1102.7235                |
| 1401.4497                  | 1402.7191                | 1403.4278                |
| 763.4974                   | 764.3532                 | 764.7189                 |
| 1136.9533                  | 1137.3576                | 1138.5599                |
| 1012.4058                  | 1012.8887                | 1012.7274                |
| 1049.2997                  | 1049.784                 | 1049.8481                |
| 909.2362                   | 909.9896                 | 910.0753                 |
| 761.595                    | 762.0261                 | 762.2592                 |
| 1449.531                   | 1450.8283                | 1451.5264                |
| 719.1685                   | 719.4938                 | 720.1941                 |
| 919.7627                   | 919.6929                 | 920.1146                 |
| 804.2132                   | 805.1144                 | 804.6234                 |
| 2222.1494                  | 2223.0175                | 2223.7346                |
| 2368.6364                  | 2371.1493                | 2371.1493                |
| 1749.5297                  | 1750.1448                | 1750.1512                |
| 703.6115                   | 703.7226                 | 703.7667                 |
| 1481.6715                  | 1481.8825                | 1481.7628                |

|           |           |            |
|-----------|-----------|------------|
| 1410.6237 | 1411.7913 | 1410.6978  |
| 1177.4647 | 1178.2311 | 1177.8614  |
| 1340.3916 | 1340.5129 | 1340.7497  |
| 1674.1154 | 1674.5445 | 1674.8709  |
| 1192.7974 | 1192.9291 | 1193.128   |
| 1526.4549 | 1526.7535 | 1526.9736  |
| 1145.2062 | 1145.9062 | 1146.54755 |
| 1243.7489 | 1245.1366 | 1245.1366  |
| 1031.6418 | 1031.9321 | 1032.53275 |
| 1130.5874 | 1130.7603 | 1131.5318  |
| 943.3253  | 943.5802  | 943.92625  |
| 844.1974  | 844.3167  | 844.6789   |
| 745.01    | 745.2167  | 745.48675  |
| 977.8037  | 978.3673  | 978.5757   |
| 1204.581  | 1205.5086 | 1205.4777  |
| 1529.647  | 1530.8834 | 1530.8197  |
| 1303.8232 | 1303.8942 | 1302.3964  |

| PKA_RIa_D20_1hr_3(60.00) | PKA_RIa_D20_4hr_1(240.00) | PKA_RIa_D20_4hr_2(240.00) |
|--------------------------|---------------------------|---------------------------|
| 1632.21                  | 1632.3291                 | 1632.1527                 |
| 1866.5499                | 1866.774                  | 1866.3567                 |
| 1331.8153                | 1332.3988                 | 1332.2804                 |
| 1031.7853                | 1032.5704                 | 1032.4847                 |
| 1217.3353                | 1217.7566                 | 1218.0249                 |
| 1103.4899                | 1103.747                  | 1104.5491                 |
| 804.869                  | 804.5526                  | 805.512                   |
| 1135.4489                | 1135.6227                 | 1136.3194                 |
| 1282.4968                | 1282.6788                 | 1283.2974                 |
| 1395.8456                | 1396.3977                 | 1396.6611                 |
| 1077.5434                | 1077.7129                 | 1078.1303                 |
| 1336.5654                | 1336.6518                 | 1336.5393                 |
| 817.0761                 | 816.9819                  | 816.1742                  |
| 989.4293                 | 989.4975                  | 989.4149                  |
| 1103.9451                | 1103.6409                 | 1105.2213                 |
| 989.5504                 | 989.445                   | 990.3366                  |
| 978.3963                 | 978.6146                  | 978.4788                  |
| 1598.0391                | 1598.6515                 | 1598.3148                 |
| 914.3708                 | 914.8553                  | 915.1502                  |
| 1550.94985               | 1552.2259                 | 1552.97195                |
| 1699.4027                | 1699.2021                 | 1700.2717                 |
| 1327.3047                | 1327.063                  | 1327.5523                 |
| 956.6462                 | 956.2947                  | 957.1195                  |
| 1071.7226                | 1071.4295                 | 1072.1908                 |
| 1171.036                 | 1170.7552                 | 1171.7864                 |
| 854.7744                 | 854.4626                  | 855.1616                  |
| 1103.3351                | 1103.058                  | 1103.8476                 |
| 1404.2027                | 1403.7429                 | 1404.5459                 |
| 765.4883                 | 764.8864                  | 765.5991                  |
| 1139.068                 | 1138.1768                 | 1139.683                  |
| 1013.4941                | 1013.3857                 | 1013.761                  |
| 1050.3585                | 1049.8802                 | 1050.8923                 |
| 910.6199                 | 910.5568                  | 910.7334                  |
| 762.8203                 | 762.5153                  | 763.0023                  |
| 1454.8791                | 1450.5521                 | 1454.1988                 |
| 721.7671                 | 720.2744                  | 722.1067                  |
| 919.90375                | 919.9509                  | 921.0004                  |
| 804.5755                 | 804.7697                  | 804.962                   |
| 2225.3282                | 2224.8832                 | 2225.9405                 |
| 2371.1493                | 2373.3079                 | 2373.3079                 |
| 1751.6573                | 1750.8475                 | 1752.2915                 |
| 704.0356                 | 703.9233                  | 704.369                   |
| 1482.1156                | 1482.7292                 | 1482.4864                 |

|           |            |           |
|-----------|------------|-----------|
| 1411.7554 | 1411.3512  | 1411.4754 |
| 1178.4249 | 1178.7173  | 1178.9045 |
| 1341.5133 | 1340.891   | 1341.9991 |
| 1675.0935 | 1674.7423  | 1675.5964 |
| 1193.9014 | 1193.304   | 1194.338  |
| 1527.5435 | 1527.143   | 1528.1953 |
| 1147.1889 | 1147.3306  | 1147.2804 |
| 1245.1366 | 1247.13565 | 1246.9455 |
| 1033.1334 | 1032.3818  | 1033.535  |
| 1132.3033 | 1131.299   | 1133.0433 |
| 944.2723  | 943.8421   | 944.8594  |
| 845.0411  | 844.4011   | 845.5541  |
| 745.7568  | 745.3203   | 746.3675  |
| 979.1247  | 978.6389   | 979.576   |
| 1206.6587 | 1205.9395  | 1207.073  |
| 1531.2121 | 1531.2976  | 1531.505  |
| 1303.5917 | 1303.4015  | 1303.5229 |

PKA\_R1a\_D20\_4hr\_3(240.00)

1632.2608

1866.4138

1332.3309

1032.6202

1218.0949

1104.8726

805.7769

1136.4441

1283.6368

1396.9601

1078.4902

1336.606

817.1

989.2177

1105.4717

990.6719

978.5067

1598.4604

915.2483

1553.718

1700.6569

1328.0177

957.6152

1072.9143

1172.3965

855.4041

1104.0759

1405.0528

765.5022

1139.9

1013.9698

1051.2109

910.8087

763.0493

1454.4499

722.2215

920.9393

805.0754

2226.9725

2373.3079

1752.7366

704.7474

1482.7065



1411.5712  
1179.3396  
1342.3999  
1676.5199  
1194.743  
1528.5329  
1147.7831  
1247.3258  
1033.806  
1133.2826  
945.277  
845.9412  
746.6672  
979.8575  
1207.2868  
1531.5291  
1302.3268

Supplementary Table 2: The entire list of smAKAP peptides of the hydrogen/deuterium exchange displaying the large amount of deuterium incorporation in the AKB domain after ten seconds.

| Sequence                   | Protein | Start | End | Molecular hydrophobicity | Charge |
|----------------------------|---------|-------|-----|--------------------------|--------|
| MLVPRGSL                   | smAKAP  | 25    | 32  | 872.5022                 | 1.96   |
| MLVPRGSLM                  | smAKAP  | 25    | 33  | 1003.5427                | 1.98   |
| KSKQTFPFPTIY               | smAKAP  | 37    | 48  | 1456.7835                | 2.28   |
| SKQTFPFPTIY                | smAKAP  | 38    | 48  | 1328.6885                | 1.96   |
| SKQTFPFPTIYE               | smAKAP  | 38    | 49  | 1457.7311                | 1.99   |
| KQTFPFPTIY                 | smAKAP  | 39    | 48  | 1241.6565                | 1.97   |
| QTFPFPTI                   | smAKAP  | 40    | 47  | 950.4982                 | 1.57   |
| QTFPFPTIY                  | smAKAP  | 40    | 48  | 1113.5615                | 1.66   |
| QTFPFPTIYE                 | smAKAP  | 40    | 49  | 1242.6041                | 1.72   |
| QTFPFPTIYEGEK              | smAKAP  | 40    | 52  | 1556.7631                | 2.06   |
| QTFPFPTIYEGEKQHESEE        | smAKAP  | 40    | 58  | 2296.0404                | 2.84   |
| QTFPFPTIYEGEKQHESEEPFM     | smAKAP  | 40    | 61  | 2671.2021                | 2.94   |
| QTFPFPTIYEGEKQHESEEPFMPEE  | smAKAP  | 40    | 64  | 3026.34                  | 3.05   |
| QTFPFPTIYEGEKQHESEEPFMPEE  | smAKAP  | 40    | 64  | 3042.3349                | 3.1    |
| TFPFPTIY                   | smAKAP  | 41    | 48  | 985.5029                 | 1.43   |
| TFPFPTIYE                  | smAKAP  | 41    | 49  | 1114.5455                | 1.53   |
| TFPFPTIYEGEKQHESEE         | smAKAP  | 41    | 58  | 2167.9819                | 2.79   |
| TFPFPTIYEGEKQHESEEPFM      | smAKAP  | 41    | 61  | 2543.1435                | 2.9    |
| TFPFPTIYEGEKQHESEEPFMPEE   | smAKAP  | 41    | 64  | 2898.2815                | 3      |
| TFPFPTIYEGEKQHESEEPFMPEE   | smAKAP  | 41    | 64  | 2914.2764                | 3.07   |
| FPTIYEGEKQHESEE            | smAKAP  | 44    | 58  | 1822.813                 | 2.67   |
| FPTIYEGEKQHESEEPFMPEE      | smAKAP  | 44    | 64  | 2553.1126                | 2.88   |
| TIYEGEK                    | smAKAP  | 46    | 52  | 839.4145                 | 1.78   |
| TIYEGEKQHESEE              | smAKAP  | 46    | 58  | 1578.6918                | 2.54   |
| TIYEGEKQHESEEPFM           | smAKAP  | 46    | 61  | 1953.8535                | 2.62   |
| TIYEGEKQHESEEPFMPEE        | smAKAP  | 46    | 64  | 2308.9914                | 2.72   |
| TIYEGEKQHESEEPFMPEE        | smAKAP  | 46    | 64  | 2324.9863                | 2.8    |
| TIYEGEKQHESEEPFMPEERC      | smAKAP  | 46    | 66  | 2568.1017                | 3.48   |
| TIYEGEKQHESEEPFMPEERCLPRMA | smAKAP  | 46    | 71  | 3136.4173                | 4.59   |
| IYEGEKQHESEEPFM            | smAKAP  | 47    | 61  | 1852.8058                | 2.58   |
| IYEGEKQHESEEPFMPEE         | smAKAP  | 47    | 64  | 2207.9438                | 2.72   |
| YEGEKQHESEEPFMPEE          | smAKAP  | 48    | 64  | 2094.8597                | 2.64   |
| EGEKQHESEEPFM              | smAKAP  | 49    | 61  | 1576.6584                | 2.4    |
| EGEKQHESEEPFMPEE           | smAKAP  | 49    | 64  | 1931.7964                | 2.5    |
| EGEKQHESEEPFMPEE           | smAKAP  | 49    | 64  | 1947.7913                | 2.65   |
| EGEKQHESEEPFMPEERCLP       | smAKAP  | 49    | 68  | 2401.0435                | 2.81   |
| EGEKQHESEEPFMPEERCLPRMA    | smAKAP  | 49    | 71  | 2759.2222                | 4.18   |
| GEKQHESEEPFMPEE            | smAKAP  | 50    | 64  | 1802.7538                | 2.51   |
| QHESEEPFMPEE               | smAKAP  | 53    | 64  | 1488.5948                | 1.97   |
| PFMPEER                    | smAKAP  | 59    | 65  | 905.4186                 | 1.93   |
| PFMPEERCLPRMA              | smAKAP  | 59    | 71  | 1576.7433                | 2.9    |
| MPEERCLPR                  | smAKAP  | 61    | 69  | 1130.5445                | 2.54   |
| PEERCLPRMA                 | smAKAP  | 62    | 71  | 1201.5816                | 2.68   |
| RCLPRMA                    | smAKAP  | 65    | 71  | 846.4437                 | 1.95   |
| RCLPRMASPVN                | smAKAP  | 65    | 75  | 1243.6398                | 2.12   |
| ASPVNVKE                   | smAKAP  | 71    | 78  | 843.4571                 | 1.75   |

|                           |        |     |     |           |      |
|---------------------------|--------|-----|-----|-----------|------|
| ASPVNVKEEVKEPPGTNT        | smAKAP | 71  | 88  | 1895.9709 | 2.68 |
| SPVNVKE                   | smAKAP | 72  | 78  | 772.4199  | 1.56 |
| SPVNVKEE                  | smAKAP | 72  | 79  | 901.4625  | 1.82 |
| SPVNVKEEVKEPPG            | smAKAP | 72  | 85  | 1508.7955 | 2.7  |
| SPVNVKEEVKEPPGTN          | smAKAP | 72  | 87  | 1723.8861 | 2.67 |
| SPVNVKEEVKEPPGTNT         | smAKAP | 72  | 88  | 1824.9338 | 2.71 |
| SPVNVKEEVKEPPGTNTVI       | smAKAP | 72  | 90  | 2037.0863 | 2.77 |
| SPVNVKEEVKEPPGTNTVIL      | smAKAP | 72  | 91  | 2150.1703 | 2.78 |
| PVNVKEEVKEPPGTNT          | smAKAP | 73  | 88  | 1737.9018 | 2.78 |
| VNVKEEVKEPPGTN            | smAKAP | 74  | 87  | 1539.8013 | 2.53 |
| NVKEEVKEPPGTN             | smAKAP | 75  | 87  | 1440.7329 | 2.38 |
| NVKEEVKEPPGTNT            | smAKAP | 75  | 88  | 1541.7806 | 2.45 |
| VKEEVKEPPGTN              | smAKAP | 76  | 87  | 1326.69   | 2.31 |
| VKEEVKEPPGTNT             | smAKAP | 76  | 88  | 1427.7376 | 2.45 |
| KEEVKEPPGTN               | smAKAP | 77  | 87  | 1227.6216 | 2.06 |
| KEEVKEPPGTNTV             | smAKAP | 77  | 89  | 1427.7376 | 2.42 |
| KEEVKEPPGTNTVILE          | smAKAP | 77  | 92  | 1782.9484 | 2    |
| EEVKEPPGTN                | smAKAP | 78  | 87  | 1099.5266 | 2    |
| EEVKEPPGTNT               | smAKAP | 78  | 88  | 1200.5743 | 1.9  |
| EVKEPPGTN                 | smAKAP | 79  | 87  | 970.484   | 1.8  |
| EVKEPPGTNT                | smAKAP | 79  | 88  | 1071.5317 | 1.87 |
| VKEPPGTN                  | smAKAP | 80  | 87  | 841.4414  | 1.75 |
| YAHRLSQDIL                | smAKAP | 93  | 102 | 1215.648  | 1.98 |
| YAHRLSQDILCDALQQWACNNIKYH | smAKAP | 93  | 117 | 3003.4352 | 3.08 |
| HRLSQDILC                 | smAKAP | 95  | 103 | 1084.5568 | 2    |
| CDALQQW                   | smAKAP | 103 | 109 | 863.3716  | 1.4  |
| CDALQQWACNNIKYHDIPYIESEGP | smAKAP | 103 | 127 | 2907.3076 | 3.13 |
| DALQQWA                   | smAKAP | 104 | 110 | 831.3995  | 1.32 |
| DALQQWACN                 | smAKAP | 104 | 112 | 1048.4517 | 1.56 |
| DALQQWACNN                | smAKAP | 104 | 113 | 1162.4946 | 1.76 |
| DALQQWACNNIKYHDIPYIE      | smAKAP | 104 | 123 | 2434.1496 | 2.84 |
| DALQQWACNNIKYHDIPYIESEGP  | smAKAP | 104 | 127 | 2804.2985 | 3.13 |
| ALQQWACN                  | smAKAP | 105 | 112 | 933.4247  | 1.29 |
| ALQQWACNNIKY              | smAKAP | 105 | 116 | 1451.71   | 2.13 |
| ALQQWACNNIKYHDIPYIESEGP   | smAKAP | 105 | 127 | 2689.2715 | 3.05 |
| WACNNIKY                  | smAKAP | 109 | 116 | 1011.4717 | 1.85 |
| WACNNIKYH                 | smAKAP | 109 | 117 | 1148.5306 | 2.43 |
| WACNNIKYHDIPYIESEGP       | smAKAP | 109 | 127 | 2249.0332 | 2.8  |
| ACNNIKY                   | smAKAP | 110 | 116 | 825.3923  | 1.73 |
| ACNNIKYHDIPYIE            | smAKAP | 110 | 123 | 1692.805  | 2.53 |
| ACNNIKYHDIPYIESEGP        | smAKAP | 110 | 127 | 2062.9539 | 2.69 |
| NIKYHDIPY                 | smAKAP | 113 | 121 | 1162.5891 | 2.31 |
| NIKYHDIPYIE               | smAKAP | 113 | 123 | 1404.7158 | 2.29 |
| IKYHDIPYIESEGP            | smAKAP | 114 | 127 | 1660.8217 | 2.51 |
| YHDIPYIESEGP              | smAKAP | 116 | 127 | 1419.6427 | 1.98 |
| HDIPYIESEGP               | smAKAP | 117 | 127 | 1256.5794 | 1.83 |
| DIPYIESEGP                | smAKAP | 118 | 127 | 1119.5204 | 1.45 |
| IPYIESEGP                 | smAKAP | 119 | 127 | 1004.4935 | 1.49 |

| Retention time | Intensity | Rla_plus_1(0.00) | Rla_plus_2(0.00) | Rla_plus_3(0.00) | Rla_plus_1(0.17) |
|----------------|-----------|------------------|------------------|------------------|------------------|
| 6.59           | 11543     | 872.9458         | 872.9833         | 873.085          | 875.102          |
| 7.12           | 8322      | 1004.1596        | 1004.2816        | 1004.2206        | 1006.9232        |
| 7.98           | 18775     | 1457.585         | 1457.4831        | 1457.6016        | 1461.239         |
| 8.43           | 18674     | 1329.5045        | 1329.396         | 1329.4049        | 1333.0113        |
| 8.25           | 10830     | 1458.6551        | 1458.4834        | 1458.5854        | 1462.3953        |
| 8.44           | 2585      | 1242.2992        | 1242.2937        | 1242.3342        | 1245.1754        |
| 9.08           | 2783      | 950.8343         | 950.7876         | 950.881          | 952.9842         |
| 9.14           | 158096    | 1114.9802        | 1114.9545        | 1114.9174        | 1117.8615        |
| 8.94           | 80149     | 1243.2128        | 1243.1999        | 1243.1422        | 1246.5893        |
| 8.01           | 3336      | 1557.5556        | 1557.6087        | 1557.4266        | 1562.1877        |
| 7.47           | 47956     | 2297.2199        | 2297.3466        | 2297.353         | 2303.3662        |
| 8.27           | 35265     | 2672.9204        | 2672.8829        | 2672.8478        | 2679.8546        |
| 8.1            | 174465    | 3028.2049        | 3028.1489        | 3028.1465        | 3035.847         |
| 7.82           | 10863     | 3044.1406        | 3044.1499        | 3044.0808        | 3052.0598        |
| 9.34           | 88112     | 986.0421         | 985.942          | 985.8919         | 988.3305         |
| 9.67           | 72162     | 1115.0541        | 1115.0548        | 1114.983         | 1117.8656        |
| 7.67           | 50496     | 2169.2551        | 2169.2493        | 2169.1995        | 2174.7159        |
| 8.36           | 49791     | 2544.8238        | 2544.7458        | 2544.7371        | 2550.9807        |
| 8.45           | 171571    | 2900.0957        | 2900.0148        | 2900.0365        | 2907.0403        |
| 7.85           | 16522     | 2915.9853        | 2916.0736        | 2915.9739        | 2923.1252        |
| 6.16           | 4947      | 1823.8948        | 1823.7361        | 1823.7299        | 1828.7912        |
| 7.44           | 24359     | 2554.6748        | 2554.6806        | 2554.6496        | 2561.0231        |
| 4.73           | 3568      | 839.8859         | 839.8017         | 839.8446         | 841.5725         |
| 4.52           | 11658     | 1579.5713        | 1579.5633        | 1579.5513        | 1583.7421        |
| 6.78           | 22832     | 1955.0993        | 1955.0786        | 1955.0395        | 1959.6615        |
| 6.79           | 206689    | 2310.3523        | 2310.3486        | 2310.376         | 2315.7816        |
| 6.16           | 7846      | 2326.314         | 2326.3476        | 2326.3812        | 2331.9889        |
| 6.52           | 8325      | 2569.4905        | 2569.463         | 2569.5528        | 2575.5152        |
| 7.91           | 5792      | 3139.8455        | 3137.893         | 3138.2114        | 3143.1339        |
| 6.73           | 3186      | 1853.5257        | 1853.7442        | 1853.8747        | 1857.5316        |
| 6.76           | 29484     | 2209.2348        | 2209.2719        | 2209.2998        | 2213.9718        |
| 6.69           | 8854      | 2095.8179        | 2096.0284        | 2096.1016        | 2100.0726        |
| 6.53           | 30406     | 1577.5298        | 1577.6199        | 1577.5556        | 1580.3878        |
| 6.59           | 213067    | 1932.918         | 1932.9083        | 1932.9068        | 1936.5304        |
| 5.82           | 15837     | 1948.9236        | 1948.9546        | 1949.9266        | 1952.7716        |
| 7.55           | 14464     | 2402.3478        | 2402.3684        | 2402.426         | 2407.8132        |
| 8.43           | 2832      | 2761.9262        | 2760.7374        | 2766.1337        | 2765.1132        |
| 6.55           | 148095    | 1803.81          | 1803.7492        | 1803.7981        | 1807.0851        |
| 6.95           | 22112     | 1489.5268        | 1489.4443        | 1489.5005        | 1491.9716        |
| 6.09           | 6683      | 905.8596         | 905.9824         | 905.9895         | 907.3994         |
| 7.17           | 46967     | 1577.8424        | 1577.8215        | 1577.8134        | 1581.7959        |
| 6.05           | 2442      | 1130.9195        | 1131.1858        | 1131.0335        | 1133.3382        |
| 5.82           | 97956     | 1202.3624        | 1202.349         | 1202.3469        | 1205.2061        |
| 5.54           | 664803    | 846.8917         | 846.8667         | 846.926          | 848.4842         |
| 5.59           | 8724      | 1244.4249        | 1244.4615        | 1244.3478        | 1247.0467        |
| 4.62           | 7816      | 843.9166         | 843.9354         | 843.8704         | 846.7438         |

|      |        |           |           |           |             |
|------|--------|-----------|-----------|-----------|-------------|
| 5.1  | 10160  | 1896.874  | 1897.0407 | 1896.9756 | 1903.6143   |
| 4.46 | 343345 | 772.7799  | 772.7505  | 772.7215  | 775.6332    |
| 4.53 | 2674   | 901.7423  | 902.0106  | 901.9487  | 904.7747    |
| 5.01 | 1731   | 1509.4907 | 1509.6459 | 1509.965  | 1514.218    |
| 4.94 | 900226 | 1724.8115 | 1724.7733 | 1724.7477 | 1730.841    |
| 5.12 | 287929 | 1825.9395 | 1825.8986 | 1825.8974 | 1832.4476   |
| 6.02 | 6646   | 2038.5578 | 2038.3935 | 2038.3812 | 2046.0713   |
| 6.56 | 8272   | 2151.7761 | 2151.7947 | 2151.7259 | 2160.6866   |
| 4.94 | 8818   | 1738.9367 | 1739.0189 | 1738.9071 | 1744.7699   |
| 4.74 | 1794   | 1542.4388 | 1542.4836 | 1542.4612 | 1547.3921   |
| 4.3  | 48112  | 1441.5311 | 1441.5314 | 1441.5319 | 1445.9966   |
| 4.42 | 21714  | 1542.4459 | 1542.4729 | 1542.5963 | 1547.54     |
| 4.03 | 58284  | 1327.433  | 1327.43   | 1327.4606 | 1330.8235   |
| 4.2  | 39379  | 1428.5054 | 1428.5331 | 1428.5384 | 1432.8183   |
| 3.72 | 2380   | 1228.0834 | 1228.2265 | 1228.241  | 1231.5492   |
| 4.5  | 8539   | 1428.556  | 1428.3395 | 1428.4643 | 1432.7588   |
| 4.93 | 6913   | 1783.7438 | 1783.9195 | 1786.2557 | 1790.009    |
| 4.62 | 1314   | 1099.9313 | 1100.0693 | 1100.0132 | 1102.9822   |
| 4.32 | 4162   | 1201.1649 | 1201.7647 | 1201.8173 | 1205.3859   |
| 3.74 | 143797 | 970.9947  | 970.979   | 970.9477  | 973.5294    |
| 4.04 | 95150  | 1072.1138 | 1072.0899 | 1072.0831 | 1075.2579   |
| 2.96 | 3138   | 841.7576  | 841.8532  | 841.8399  | 844.1189    |
| 6.55 | 74276  | 1216.2846 | 1216.2572 | 1216.312  | 1216.0735   |
| 8.52 | 4263   | 3004.85   | 3004.9619 | 3005.9725 | 3011.4948   |
| 6.52 | 50872  | 1085.1024 | 1085.1569 | 1085.1294 | 1086.0095   |
| 7.96 | 4178   | 863.7635  | 863.6589  | 863.7582  | 865.9686    |
| 8.27 | 4032   | 2909.493  | 2909.3128 | 2908.6704 | 2919.6321   |
| 7.74 | 2565   | 831.682   | 831.863   | 831.6191  | 833.8514    |
| 7.7  | 11020  | 1048.847  | 1049.2107 | 1048.7788 | 1053.4637   |
| 7.58 | 3867   | 1162.9026 | 1162.9026 | 1162.9026 | 1169.2714   |
| 8.41 | 3696   | 2436.4965 | 2435.528  | 2435.7267 | 2440.872567 |
| 8.29 | 21495  | 2806.013  | 2805.987  | 2805.964  | 2814.6936   |
| 6.99 | 4512   | 933.8635  | 934.0648  | 933.8941  | 936.5009    |
| 7.47 | 1930   | 1452.0013 | 1452.8105 | 1452.1585 | 1458.2975   |
| 7.72 | 14032  | 2691.2056 | 2690.9277 | 2690.733  | 2699.5497   |
| 6.99 | 84300  | 1011.9457 | 1011.9693 | 1011.8991 | 1014.4534   |
| 6.03 | 3206   | 1148.7662 | 1149.4071 | 1149.7758 | 1149.5712   |
| 7.48 | 365375 | 2250.7489 | 2250.7335 | 2251.7603 | 2256.5496   |
| 5.44 | 5736   | 825.8672  | 825.9365  | 825.8525  | 827.8754    |
| 6.88 | 3175   | 1693.5974 | 1693.5839 | 1693.5423 | 1694.9989   |
| 6.86 | 29768  | 2064.2027 | 2064.2646 | 2064.3213 | 2069.6282   |
| 6.27 | 2200   | 1163.9229 | 1164.0951 | 1163.2143 | 1164.4915   |
| 6.92 | 22349  | 1405.4212 | 1405.5233 | 1405.5219 | 1407.9963   |
| 6.88 | 30720  | 1661.4501 | 1661.7477 | 1661.8012 | 1665.4242   |
| 7.11 | 5673   | 1420.4885 | 1420.4446 | 1420.4502 | 1423.5942   |
| 6.68 | 962435 | 1257.1598 | 1257.1539 | 1257.135  | 1260.3333   |
| 7.4  | 27445  | 1120.1513 | 1120.1286 | 1120.3633 | 1122.7869   |
| 7.02 | 5041   | 1005.0355 | 1004.9514 | 1004.9703 | 1008.1075   |

| Rla_plus_2(0.17) | Rla_plus_3(0.17) | Rla_plus_1(1.00) | Rla_plus_2(1.00) | Rla_plus_3(1.00) |
|------------------|------------------|------------------|------------------|------------------|
| 875.1871         | 875.2297         | 875.4276         | 875.4751         | 875.6079         |
| 1006.5854        | 1006.7766        | 1007.2157        | 1007.1986        | 1007.0442        |
| 1460.9171        | 1461.6686        | 1461.9078        | 1461.4351        | 1461.0019        |
| 1332.8238        | 1333.0388        | 1333.2268        | 1333.2939        | 1333.2594        |
| 1462.1507        | 1462.3811        | 1462.9017        | 1462.9008        | 1463.1563        |
| 1245.5617        | 1245.36855       | 1245.0176        | 1244.2985        | 1244.65805       |
| 953.0013         | 952.99275        | 953.0767         | 953.0767         | 953.0767         |
| 1117.3996        | 1117.4179        | 1118.0626        | 1117.8471        | 1117.5506        |
| 1246.264         | 1246.57          | 1246.9565        | 1247.0159        | 1246.8086        |
| 1561.9095        | 1562.2987        | 1562.5338        | 1562.6639        | 1562.3054        |
| 2303.2057        | 2303.3437        | 2304.0898        | 2303.9774        | 2303.8255        |
| 2679.7236        | 2679.7315        | 2680.7129        | 2680.5774        | 2680.3212        |
| 3035.8098        | 3035.9248        | 3037.1068        | 3036.8613        | 3036.6089        |
| 3051.9913        | 3052.1762        | 3052.7409        | 3053.2656        | 3052.6607        |
| 988.1658         | 988.2159         | 988.6087         | 988.5883         | 988.4872         |
| 1117.7402        | 1117.7843        | 1118.1792        | 1118.1925        | 1118.0335        |
| 2174.5899        | 2174.6665        | 2175.3092        | 2175.3423        | 2175.153         |
| 2551.0446        | 2551.224         | 2551.9861        | 2551.9917        | 2551.5741        |
| 2906.8982        | 2907.2549        | 2908.1596        | 2908.3637        | 2907.8966        |
| 2923.9026        | 2923.5834        | 2924.2174        | 2924.5979        | 2924.1323        |
| 1828.5311        | 1828.6081        | 1829.2787        | 1829.0607        | 1828.6553        |
| 2561.1748        | 2561.5739        | 2561.9661        | 2561.9401        | 2561.5069        |
| 841.8016         | 841.8062         | 842.2448         | 842.3229         | 842.3695         |
| 1583.698         | 1583.6536        | 1583.9846        | 1584.3474        | 1583.7598        |
| 1959.7658        | 1959.9101        | 1960.2605        | 1960.2704        | 1960.0452        |
| 2315.7967        | 2315.8599        | 2316.4614        | 2316.4941        | 2316.2618        |
| 2331.9758        | 2331.966         | 2332.7556        | 2332.951         | 2332.8084        |
| 2575.0949        | 2575.30505       | 2576.5885        | 2578.3812        | 2577.48485       |
| 3145.6025        | 3146.1362        | 3147.4348        | 3145.7303        | 3144.1246        |
| 1856.864         | 1856.1373        | 1858.2543        | 1857.4766        | 1857.3248        |
| 2214.0472        | 2213.9707        | 2214.5024        | 2214.4987        | 2214.3255        |
| 2100.2005        | 2101.2568        | 2100.7168        | 2099.3445        | 2100.8058        |
| 1580.3459        | 1580.1689        | 1580.7655        | 1581.0104        | 1580.6623        |
| 1936.465         | 1936.5538        | 1937.032         | 1937.0426        | 1936.8447        |
| 1952.3015        | 1953.3749        | 1953.0933        | 1953.0353        | 1952.9921        |
| 2407.1087        | 2407.5754        | 2408.2551        | 2408.2367        | 2407.5101        |
| 2762.3321        | 2762.7592        | 2766.8861        | 2764.2688        | 2766.6744        |
| 1806.9585        | 1807.1026        | 1807.6085        | 1807.6854        | 1807.4834        |
| 1491.9255        | 1491.9975        | 1492.4959        | 1492.4556        | 1492.3147        |
| 907.2958         | 907.4633         | 907.9789         | 907.8982         | 907.7503         |
| 1581.5673        | 1581.7774        | 1582.3388        | 1582.3902        | 1582.3833        |
| 1133.3382        | 1133.3382        | 1133.4719        | 1133.5132        | 1133.49255       |
| 1205.0523        | 1205.2205        | 1205.5829        | 1205.5371        | 1205.426         |
| 848.3146         | 848.2272         | 848.687          | 848.5586         | 848.5664         |
| 1247.7208        | 1247.9155        | 1247.8478        | 1247.7666        | 1247.7741        |
| 846.6445         | 846.6964         | 847.2471         | 847.1148         | 846.8431         |

|             |             |           |           |           |
|-------------|-------------|-----------|-----------|-----------|
| 1903.6365   | 1903.6622   | 1904.4582 | 1904.4834 | 1903.9129 |
| 775.6216    | 775.6084    | 775.9511  | 775.9405  | 775.7705  |
| 905.2466    | 905.0635    | 905.4167  | 905.4066  | 905.3967  |
| 1515.04     | 1514.3155   | 1514.6677 | 1514.5583 | 1514.8235 |
| 1730.8103   | 1730.9086   | 1731.5389 | 1731.5261 | 1731.1907 |
| 1832.4407   | 1832.5374   | 1833.1345 | 1833.2622 | 1832.9648 |
| 2046.3144   | 2045.8982   | 2047.1671 | 2047.6667 | 2046.5733 |
| 2159.6615   | 2160.1973   | 2161.3486 | 2161.4306 | 2160.8536 |
| 1744.8477   | 1745.0451   | 1745.4596 | 1745.6177 | 1745.1961 |
| 1547.048    | 1547.0567   | 1547.9493 | 1547.7677 | 1547.2906 |
| 1445.8451   | 1445.9587   | 1446.4985 | 1446.4795 | 1446.1643 |
| 1547.4216   | 1547.6346   | 1548.2061 | 1548.288  | 1547.8619 |
| 1331.1591   | 1330.9505   | 1331.0943 | 1331.2555 | 1331.1724 |
| 1432.9717   | 1432.8881   | 1433.1568 | 1433.1216 | 1433.1957 |
| 1231.517    | 1231.5331   | 1232.1057 | 1232.1057 | 1232.1057 |
| 1432.386    | 1432.7354   | 1433.1985 | 1433.2849 | 1432.6284 |
| 1789.9283   | 1790.0127   | 1790.6404 | 1790.7162 | 1790.3461 |
| 1103.0802   | 1103.5294   | 1103.2023 | 1103.2023 | 1103.2023 |
| 1204.9522   | 1204.6548   | 1205.186  | 1205.1794 | 1205.1191 |
| 973.5045    | 973.5156    | 973.7919  | 973.7653  | 973.6291  |
| 1075.1597   | 1075.2192   | 1075.526  | 1075.5482 | 1075.3488 |
| 843.9291    | 843.8644    | 844.0761  | 844.1822  | 844.2892  |
| 1216.6191   | 1216.0821   | 1218.1788 | 1216.648  | 1217.4134 |
| 3009.6801   | 3011.5122   | 3012.8436 | 3011.3225 | 3011.7997 |
| 1086.5688   | 1086.1487   | 1087.4091 | 1086.6949 | 1087.19   |
| 866.2798    | 865.8788    | 865.4553  | 866.4079  | 865.9316  |
| 2915.8472   | 2919.9179   | 2917.9045 | 2917.4191 | 2923.2215 |
| 833.7693    | 833.26      | 834.7566  | 834.3382  | 834.3521  |
| 1052.5835   | 1053.0108   | 1053.6906 | 1053.3434 | 1053.5441 |
| 1169.3278   | 1169.2849   | 1169.3875 | 1169.3256 | 1169.3081 |
| 2440.872567 | 2440.872567 | 2446.1194 | 2445.7282 | 2445.6366 |
| 2815.7147   | 2815.0207   | 2817.8293 | 2818.5196 | 2816.8455 |
| 936.9814    | 937.4567    | 937.8849  | 937.0579  | 937.4714  |
| 1458.3157   | 1458.2793   | 1459.2161 | 1459.2577 | 1459.2369 |
| 2698.7473   | 2699.4104   | 2701.7473 | 2701.5559 | 2700.874  |
| 1014.5341   | 1014.6103   | 1015.268  | 1015.2394 | 1015.1216 |
| 1149.4369   | 1149.4318   | 1149.7826 | 1149.7123 | 1149.7487 |
| 2256.5224   | 2256.5394   | 2257.7335 | 2257.8038 | 2257.5961 |
| 827.8688    | 827.8614    | 828.3949  | 828.3335  | 828.25    |
| 1695.01     | 1695.2223   | 1696.0376 | 1695.8605 | 1695.7599 |
| 2069.8591   | 2070.3313   | 2070.5552 | 2070.9063 | 2070.5532 |
| 1163.9572   | 1164.4154   | 1164.5347 | 1164.4943 | 1164.5145 |
| 1408.0426   | 1408.4247   | 1408.8304 | 1408.4259 | 1408.6906 |
| 1665.172    | 1665.5793   | 1665.9004 | 1665.9666 | 1665.7025 |
| 1423.6361   | 1423.6622   | 1424.1241 | 1424.4678 | 1424.211  |
| 1260.2564   | 1260.3917   | 1260.9665 | 1260.9293 | 1260.7846 |
| 1122.6349   | 1122.8003   | 1123.2357 | 1123.2632 | 1123.1171 |
| 1008.0078   | 1007.9982   | 1008.453  | 1008.3292 | 1008.5644 |

| Rla_plus_1(10.00) | Rla_plus_2(10.00) | Rla_plus_3(10.00) | Rla_plus_1(60.00) | Rla_plus_2(60.00) |
|-------------------|-------------------|-------------------|-------------------|-------------------|
| 875.3667          | 875.5779          | 875.9715          | 875.1792          | 875.8102          |
| 1007.3822         | 1007.388          | 1007.5709         | 1007.7008         | 1007.534          |
| 1461.5155         | 1462.3249         | 1461.5711         | 1461.7293         | 1461.2602         |
| 1333.2563         | 1333.2116         | 1333.5711         | 1333.5782         | 1333.5604         |
| 1462.6472         | 1462.7213         | 1463.1897         | 1463.2131         | 1463.4045         |
| 1245.871          | 1246.0196         | 1245.7224         | 1245.7539         | 1245.3199         |
| 952.9749          | 952.9749          | 952.9749          | 953.32165         | 953.32165         |
| 1117.4441         | 1118.5565         | 1118.2107         | 1118.2315         | 1118.2577         |
| 1247.1487         | 1247.0392         | 1247.2            | 1246.9856         | 1247.189          |
| 1563.1425         | 1562.9041         | 1563.5359         | 1563.3093         | 1563.426          |
| 2304.4437         | 2304.2412         | 2304.3749         | 2304.3879         | 2303.0683         |
| 2681.182          | 2680.9356         | 2680.8876         | 2681.162          | 2681.4658         |
| 3037.5593         | 3037.2594         | 3037.4008         | 3037.6751         | 3037.2668         |
| 3053.4908         | 3052.9276         | 3053.7816         | 3053.6789         | 3053.7673         |
| 988.713           | 988.6331          | 988.795           | 988.7679          | 988.8637          |
| 1118.2898         | 1118.1654         | 1118.3188         | 1118.4789         | 1118.4991         |
| 2175.3971         | 2175.2624         | 2175.752          | 2175.6063         | 2175.8401         |
| 2552.3317         | 2552.1261         | 2552.5147         | 2552.3849         | 2552.5213         |
| 2908.5746         | 2908.1948         | 2908.5977         | 2908.7655         | 2908.8            |
| 2925.413          | 2924.3389         | 2924.9417         | 2924.8964         | 2925.4297         |
| 1829.4725         | 1828.4837         | 1829.4379         | 1829.59905        | 1829.5821         |
| 2562.6657         | 2562.1997         | 2562.666          | 2562.6639         | 2562.4368         |
| 842.7578          | 842.1384          | 842.799           | 842.7565          | 842.5896          |
| 1584.3112         | 1583.7342         | 1584.4242         | 1583.9212         | 1584.2081         |
| 1960.4927         | 1960.4091         | 1960.6286         | 1960.3406         | 1960.865          |
| 2316.7728         | 2316.6752         | 2316.8357         | 2316.9618         | 2316.943          |
| 2333.0648         | 2333.126          | 2332.9906         | 2333.0559         | 2333.6536         |
| 2577.68805        | 2575.7696         | 2579.6065         | 2579.0081         | 2581.1769         |
| 3148.1773         | 3145.8324         | 3147.2027         | 3148.3556         | 3141.9808         |
| 1858.3954         | 1856.4344         | 1856.165          | 1856.9199         | 1856.9199         |
| 2214.7683         | 2214.4922         | 2214.7761         | 2214.4267         | 2214.8776         |
| 2099.3107         | 2100.2668         | 2101.4887         | 2099.3187         | 2100.9054         |
| 1580.894          | 1580.6201         | 1581.0704         | 1580.4668         | 1580.9699         |
| 1937.3644         | 1937.0254         | 1937.264          | 1937.441          | 1937.4096         |
| 1953.0406         | 1952.9107         | 1953.2639         | 1953.4703         | 1952.6436         |
| 2409.5666         | 2408.1207         | 2408.3174         | 2408.6625         | 2407.6929         |
| 2761.3433         | 2766.2101         | 2763.4465         | 2763.7217         | 2763.9911         |
| 1807.8866         | 1807.7329         | 1807.9235         | 1807.7635         | 1808.0186         |
| 1492.7129         | 1492.5784         | 1492.645          | 1492.608          | 1492.5965         |
| 908.0608          | 908.13            | 908.1624          | 908.1825          | 908.1863          |
| 1582.6175         | 1582.6175         | 1582.8021         | 1582.7463         | 1583.0526         |
| 1133.999          | 1133.999          | 1133.999          | 1133.6579         | 1133.6579         |
| 1205.614          | 1205.5288         | 1205.8264         | 1205.763          | 1206.157          |
| 848.6206          | 848.4819          | 848.8318          | 848.828           | 848.908           |
| 1247.8285         | 1247.7013         | 1248.3775         | 1247.5474         | 1248.6596         |
| 847.4059          | 847.3817          | 847.302           | 847.384           | 847.4486          |



|           |           |            |            |           |
|-----------|-----------|------------|------------|-----------|
| 1904.7953 | 1904.9746 | 1904.8503  | 1904.9975  | 1905.102  |
| 776.037   | 776.0593  | 776.0786   | 776.1319   | 776.1749  |
| 905.4945  | 905.5537  | 905.5332   | 905.772    | 905.6492  |
| 1515.0721 | 1515.1883 | 1515.7739  | 1515.3063  | 1514.9602 |
| 1731.8311 | 1731.6198 | 1731.8464  | 1731.891   | 1732.0355 |
| 1833.5168 | 1833.3585 | 1833.6218  | 1833.6583  | 1833.7603 |
| 2047.4847 | 2048.5801 | 2047.6097  | 2047.8605  | 2046.5464 |
| 2162.1069 | 2162.3059 | 2160.8948  | 2161.3477  | 2161.8726 |
| 1745.9282 | 1745.6299 | 1745.7294  | 1745.8948  | 1746.0255 |
| 1548.1801 | 1547.8577 | 1547.9909  | 1546.2594  | 1548.0778 |
| 1446.6581 | 1446.4215 | 1446.7175  | 1446.6275  | 1446.82   |
| 1548.2984 | 1547.4821 | 1548.6068  | 1548.2849  | 1548.4871 |
| 1331.4263 | 1331.2202 | 1331.7827  | 1331.3831  | 1331.6238 |
| 1433.205  | 1433.303  | 1433.592   | 1433.5667  | 1433.5962 |
| 1231.6071 | 1231.6071 | 1231.6071  | 1231.5416  | 1231.5416 |
| 1433.63   | 1433.3729 | 1433.5164  | 1433.4598  | 1433.0262 |
| 1791.0318 | 1790.9191 | 1791.0228  | 1791.0223  | 1791.2912 |
| 1103.0758 | 1103.4717 | 1103.5963  | 1103.7706  | 1103.9133 |
| 1205.3336 | 1205.0921 | 1205.4813  | 1205.1076  | 1205.741  |
| 973.8588  | 973.8079  | 973.9239   | 973.8816   | 973.9979  |
| 1075.6789 | 1075.4946 | 1075.6695  | 1075.691   | 1075.743  |
| 844.3446  | 843.9695  | 844.3595   | 844.4533   | 844.3807  |
| 1217.2353 | 1217.3933 | 1217.5513  | 1219.9828  | 1219.7664 |
| 3015.4364 | 3016.704  | 3014.9189  | 3016.9699  | 3018.1449 |
| 1086.806  | 1087.9898 | 1088.0051  | 1087.86045 | 1087.1108 |
| 866.8299  | 866.9915  | 866.9782   | 866.8747   | 866.8747  |
| 2918.3039 | 2917.4949 | 2920.1584  | 2924.8014  | 2921.3827 |
| 834.502   | 835.5347  | 834.7108   | 834.8679   | 835.329   |
| 1053.9431 | 1053.9643 | 1054.2791  | 1054.0085  | 1054.37   |
| 1169.682  | 1169.7667 | 1169.5952  | 1170.1297  | 1170.0216 |
| 2447.1366 | 2445.9563 | 2446.54645 | 2446.52525 | 2446.7829 |
| 2818.6996 | 2819.1519 | 2818.9923  | 2818.1783  | 2819.1509 |
| 937.5655  | 937.4615  | 938.0313   | 937.4445   | 938.4308  |
| 1459.7337 | 1459.6988 | 1459.8322  | 1459.8298  | 1459.8177 |
| 2702.7901 | 2702.6489 | 2702.425   | 2703.0583  | 2702.6957 |
| 1015.7582 | 1015.5134 | 1015.6098  | 1015.545   | 1015.554  |
| 1150.58   | 1150.5515 | 1150.7443  | 1151.3235  | 1151.4252 |
| 2258.2582 | 2258.0412 | 2258.2694  | 2258.5487  | 2258.5096 |
| 828.5539  | 828.4461  | 828.5447   | 828.7663   | 828.7798  |
| 1696.6924 | 1696.816  | 1696.9342  | 1697.9614  | 1697.9968 |
| 2070.2929 | 2070.7999 | 2071.3066  | 2071.1795  | 2071.3925 |
| 1164.4127 | 1163.9546 | 1164.8441  | 1165.0158  | 1165.0158 |
| 1408.7328 | 1408.2887 | 1409.2181  | 1409.09655 | 1408.8224 |
| 1666.4456 | 1665.9748 | 1666.1677  | 1666.2885  | 1666.4736 |
| 1424.945  | 1424.3035 | 1424.7758  | 1424.3735  | 1424.4959 |
| 1261.1039 | 1261.0187 | 1261.1661  | 1261.1315  | 1261.2619 |
| 1123.4827 | 1123.2859 | 1123.7459  | 1123.51    | 1123.5511 |
| 1008.2494 | 1008.3247 | 1008.465   | 1008.7759  | 1008.5449 |

| Rla_plus_3(60.00) | Rla_plus_1(240.00) | Rla_plus_2(240.00) | Rla_plus_3(240.00) | smAKAP_1(0.00) |
|-------------------|--------------------|--------------------|--------------------|----------------|
| 875.5163          | 875.6789           | 875.5641           | 875.5921           | 872.9681       |
| 1007.5541         | 1007.751           | 1007.6053          | 1007.542           | 1004.1607      |
| 1462.1984         | 1462.2286          | 1462.0088          | 1462.4983          | 1457.5743      |
| 1333.596          | 1333.6242          | 1333.2927          | 1333.6167          | 1329.4246      |
| 1463.1489         | 1463.1711          | 1463.037           | 1463.1561          | 1458.5572      |
| 1246.1879         | 1246.0539          | 1245.5528          | 1245.8416          | 1242.3874      |
| 953.32165         | 953.6684           | 953.6684           | 953.6684           | 950.9699       |
| 1118.077          | 1118.134           | 1118.0002          | 1117.9387          | 1114.9496      |
| 1247.2403         | 1247.3237          | 1247.174           | 1247.2593          | 1243.1523      |
| 1563.2416         | 1563.4706          | 1563.378           | 1563.0656          | 1557.6723      |
| 2304.5121         | 2304.8221          | 2304.4315          | 2304.6099          | 2297.3534      |
| 2681.4182         | 2681.5941          | 2681.3709          | 2681.2244          | 2672.8106      |
| 3037.6396         | 3037.7206          | 3037.6611          | 3037.7203          | 3028.1024      |
| 3053.951          | 3053.9224          | 3053.7037          | 3053.7083          | 3044.3838      |
| 988.8469          | 988.8653           | 988.84             | 988.8204           | 985.9171       |
| 1118.4356         | 1118.5946          | 1118.5136          | 1118.2493          | 1115.0149      |
| 2175.8053         | 2175.9713          | 2175.7268          | 2175.6922          | 2169.2113      |
| 2552.5065         | 2552.7865          | 2552.4285          | 2552.4576          | 2544.7169      |
| 2908.7605         | 2909.1247          | 2908.6807          | 2908.8247          | 2900.0303      |
| 2924.8739         | 2925.0732          | 2924.8348          | 2925.0253          | 2916.1319      |
| 1829.616          | 1829.5765          | 1829.6244          | 1829.4971          | 1823.8426      |
| 2562.5156         | 2562.533           | 2562.2221          | 2562.3625          | 2554.6965      |
| 842.4918          | 842.6023           | 842.5585           | 842.7875           | 839.8534       |
| 1584.3067         | 1584.4681          | 1584.33            | 1584.2916          | 1579.5578      |
| 1960.7803         | 1960.8391          | 1960.638           | 1960.6436          | 1955.0549      |
| 2316.8793         | 2317.1781          | 2316.7933          | 2316.8217          | 2310.2974      |
| 2332.9459         | 2333.2108          | 2333.2572          | 2333.0503          | 2326.3471      |
| 2576.8393         | 2577.5514          | 2577.022           | 2576.2269          | 2569.7465      |
| 3147.8095         | 3147.846           | 3147.9769          | 3146.2869          | 3137.9572      |
| 1856.9199         | 1859.6173          | 1858.3159          | 1857.2924          | 1853.9577      |
| 2214.9455         | 2215.0348          | 2214.5888          | 2214.9002          | 2209.2677      |
| 2100.8525         | 2101.6573          | 2101.2163          | 2100.7255          | 2096.1082      |
| 1581.0022         | 1581.1048          | 1580.9836          | 1580.9512          | 1577.5969      |
| 1937.254          | 1937.5627          | 1937.229           | 1937.268           | 1932.8489      |
| 1953.2247         | 1953.6558          | 1953.439           | 1953.3863          | 1949.0095      |
| 2409.6321         | 2408.5081          | 2410.0361          | 2409.5598          | 2402.5411      |
| 2766.7994         | 2768.5238          | 2768.3183          | 2767.2112          | 2761.1891      |
| 1807.8832         | 1808.1828          | 1807.9273          | 1807.9016          | 1803.743       |
| 1492.7056         | 1492.7517          | 1492.5851          | 1492.6483          | 1489.4138      |
| 908.2455          | 908.3346           | 908.3039           | 908.1836           | 905.9455       |
| 1582.9311         | 1583.045           | 1582.7088          | 1582.8193          | 1577.8265      |
| 1133.6579         | 1133.616           | 1133.6451          | 1133.6392          | 1131.2184      |
| 1205.8597         | 1205.9926          | 1205.8483          | 1205.8368          | 1202.268       |
| 848.7641          | 848.9217           | 848.7522           | 848.765            | 846.9461       |
| 1247.8864         | 1248.5869          | 1248.4633          | 1248.4315          | 1244.43        |
| 847.4048          | 847.4597           | 847.4197           | 847.4714           | 843.8986       |

|           |            |           |            |           |
|-----------|------------|-----------|------------|-----------|
| 1905.0211 | 1905.1314  | 1904.9346 | 1905.0592  | 1897.0748 |
| 776.1772  | 776.2265   | 776.1909  | 776.1398   | 772.7478  |
| 905.6447  | 905.6863   | 905.3817  | 905.4007   | 901.9271  |
| 1516.0289 | 1515.8275  | 1515.5722 | 1515.7768  | 1509.5685 |
| 1731.9977 | 1732.2036  | 1731.9156 | 1732.0355  | 1724.7588 |
| 1833.8093 | 1833.8769  | 1833.736  | 1833.6782  | 1825.8684 |
| 2047.9044 | 2047.9553  | 2047.7484 | 2048.0127  | 2038.3509 |
| 2161.9986 | 2162.6965  | 2161.3305 | 2161.9014  | 2151.7992 |
| 1745.8405 | 1746.3042  | 1745.8782 | 1745.9588  | 1738.9657 |
| 1548.2107 | 1548.1229  | 1547.8326 | 1547.9367  | 1542.6349 |
| 1446.767  | 1446.913   | 1446.7213 | 1446.742   | 1441.4976 |
| 1548.1549 | 1548.7251  | 1547.9412 | 1548.2072  | 1542.479  |
| 1331.8662 | 1331.7332  | 1331.5604 | 1331.8444  | 1327.46   |
| 1433.5372 | 1433.7173  | 1433.4493 | 1433.5826  | 1428.5136 |
| 1231.5416 | 1231.9766  | 1233.1675 | 1231.5459  | 1228.2448 |
| 1433.3344 | 1433.8387  | 1433.3726 | 1433.7627  | 1428.5674 |
| 1791.2161 | 1791.3474  | 1791.0625 | 1791.1788  | 1783.9485 |
| 1103.6279 | 1103.6558  | 1104.3101 | 1104.0352  | 1100.095  |
| 1205.6158 | 1205.6278  | 1205.4205 | 1205.5045  | 1201.183  |
| 973.966   | 974.0541   | 973.9694  | 973.9219   | 970.9229  |
| 1075.7642 | 1075.8184  | 1075.7107 | 1075.7495  | 1072.0388 |
| 844.0966  | 844.3851   | 844.203   | 844.3952   | 841.8932  |
| 1220.1992 | 1220.5208  | 1220.5424 | 1220.7137  | 1216.23   |
| 3017.7649 | 3019.135   | 3018.6063 | 3018.8596  | 3005.2134 |
| 1088.6101 | 1088.2934  | 1088.3969 | 1087.9497  | 1085.0762 |
| 866.8747  | 867.0084   | 866.5718  | 866.6031   | 863.8259  |
| 2917.608  | 2920.1536  | 2918.6591 | 2918.461   | 2908.966  |
| 835.8739  | 835.5462   | 835.3292  | 834.9847   | 831.6893  |
| 1054.0688 | 1053.9252  | 1054.1171 | 1054.0777  | 1048.9461 |
| 1170.0248 | 1170.2175  | 1170.208  | 1170.2522  | 1163.0893 |
| 2446.2676 | 2448.6028  | 2446.9349 | 2446.2278  | 2435.5446 |
| 2819.1453 | 2819.21    | 2819.1481 | 2819.501   | 2806.0526 |
| 938.0558  | 938.4142   | 938.0037  | 938.4481   | 933.8785  |
| 1459.8056 | 1459.7265  | 1459.837  | 1459.78175 | 1452.6784 |
| 2703.1102 | 2702.7065  | 2702.9804 | 2702.9903  | 2690.884  |
| 1015.5737 | 1015.6465  | 1015.4248 | 1015.8402  | 1012.0543 |
| 1151.3819 | 1151.4394  | 1151.2898 | 1151.3322  | 1149.4724 |
| 2258.6526 | 2258.7044  | 2258.2241 | 2258.5355  | 2250.5919 |
| 828.8274  | 828.8545   | 828.8757  | 828.6018   | 825.8565  |
| 1697.9285 | 1698.8381  | 1698.4361 | 1698.5417  | 1693.9021 |
| 2071.3258 | 2071.6723  | 2070.8197 | 2071.1244  | 2064.2845 |
| 1165.0158 | 1165.19895 | 1165.3344 | 1165.0635  | 1163.3006 |
| 1409.3707 | 1408.8434  | 1409.3347 | 1408.8386  | 1405.4918 |
| 1666.3087 | 1666.0864  | 1666.3938 | 1666.3195  | 1661.7418 |
| 1424.6369 | 1424.6027  | 1424.5403 | 1424.6257  | 1420.4736 |
| 1261.2415 | 1261.328   | 1261.1764 | 1261.2047  | 1257.1702 |
| 1123.5751 | 1123.8492  | 1123.6708 | 1123.6825  | 1120.2633 |
| 1008.9597 | 1008.8404  | 1008.6456 | 1008.8374  | 1004.9356 |

| smAKAP_2(0.00) | smAKAP_3(0.00) | smAKAP_1(0.17) | smAKAP_2(0.17) | smAKAP_3(0.17) |
|----------------|----------------|----------------|----------------|----------------|
| 873.0429       | 873.0484       | 876.0087       | 875.8238       | 875.6153       |
| 1004.2165      | 1004.0906      | 1007.4223      | 1007.2484      | 1007.1472      |
| 1457.6341      | 1457.608       | 1461.7963      | 1461.5163      | 1461.5227      |
| 1329.3969      | 1329.3938      | 1333.4258      | 1333.2604      | 1333.0362      |
| 1458.5449      | 1458.5509      | 1463.1721      | 1462.9523      | 1462.6336      |
| 1242.3826      | 1242.2621      | 1246.1314      | 1245.5396      | 1245.8248      |
| 950.9233       | 950.8219       | 953.5454       | 953.8153       | 953.1706       |
| 1115.0174      | 1114.9828      | 1117.7482      | 1117.806       | 1117.6817      |
| 1243.2436      | 1243.218       | 1246.9991      | 1246.8741      | 1246.6361      |
| 1557.7121      | 1557.6729      | 1562.6451      | 1562.5097      | 1562.1558      |
| 2297.3423      | 2297.5016      | 2303.4475      | 2303.4388      | 2302.7219      |
| 2672.7239      | 2673.1599      | 2679.9598      | 2679.6439      | 2679.0045      |
| 3028.222       | 3028.1528      | 3036.1674      | 3035.9556      | 3035.2301      |
| 3044.3529      | 3044.1237      | 3052.2952      | 3052.0475      | 3051.3344      |
| 985.9951       | 985.943        | 988.7184       | 988.565        | 988.4122       |
| 1115.1029      | 1115.0434      | 1118.1972      | 1118.1133      | 1117.9386      |
| 2169.2587      | 2169.2828      | 2174.8907      | 2174.7994      | 2174.1617      |
| 2544.7692      | 2544.726       | 2551.2586      | 2550.9555      | 2550.6431      |
| 2900.0468      | 2900.0219      | 2907.4128      | 2907.0902      | 2906.5715      |
| 2916.0888      | 2916.0685      | 2923.6481      | 2923.2004      | 2922.4722      |
| 1823.8246      | 1823.7806      | 1828.756       | 1828.5719      | 1828.0071      |
| 2554.6948      | 2554.6697      | 2561.228       | 2561.1515      | 2560.504       |
| 839.9052       | 839.8793       | 842.6168       | 842.3831       | 842.3481       |
| 1579.5784      | 1579.5681      | 1584.1664      | 1583.9139      | 1583.7115      |
| 1955.0797      | 1955.086       | 1959.8661      | 1959.7979      | 1959.3008      |
| 2310.372       | 2310.3723      | 2316.0636      | 2315.9336      | 2315.3753      |
| 2326.391       | 2326.3995      | 2332.2133      | 2332.0906      | 2331.5579      |
| 2569.6986      | 2569.6395      | 2575.8722      | 2576.851       | 2574.9102      |
| 3138.379       | 3138.8289      | 3146.5862      | 3154.4227      | 3158.2278      |
| 1853.9282      | 1853.8398      | 1857.7422      | 1857.6919      | 1857.2904      |
| 2209.2827      | 2209.2573      | 2214.1676      | 2214.0188      | 2213.5214      |
| 2096.0737      | 2095.9884      | 2100.4678      | 2100.391       | 2099.556       |
| 1577.6339      | 1577.5777      | 1580.8225      | 1580.6858      | 1580.414       |
| 1932.9059      | 1932.9382      | 1936.9968      | 1936.8739      | 1936.4709      |
| 1948.9348      | 1948.963       | 1953.1533      | 1952.962       | 1952.4937      |
| 2402.6171      | 2402.1894      | 2408.6939      | 2408.3974      | 2408.1678      |
| 2761.0444      | 2760.5944      | 2767.8487      | 2766.7337      | 2769.0155      |
| 1803.7849      | 1803.7558      | 1807.6664      | 1807.5109      | 1807.1576      |
| 1489.4499      | 1489.4659      | 1492.7362      | 1493.8732      | 1490.9911      |
| 906.0027       | 905.9719       | 908.0885       | 907.8715       | 907.9903       |
| 1577.8198      | 1577.819       | 1582.5508      | 1582.3711      | 1581.9309      |
| 1131.2271      | 1131.1756      | 1134.0753      | 1133.8515      | 1133.734       |
| 1202.3137      | 1202.3546      | 1205.9734      | 1205.7107      | 1205.5577      |
| 846.8874       | 846.8337       | 849.1598       | 849.0129       | 849.056        |
| 1244.3563      | 1244.4046      | 1248.8935      | 1248.5028      | 1248.5067      |
| 843.9311       | 843.91485      | 847.357        | 847.2393       | 846.9559       |

|           |            |           |           |           |
|-----------|------------|-----------|-----------|-----------|
| 1897.0796 | 1897.0772  | 1904.534  | 1904.3305 | 1903.8235 |
| 772.763   | 772.7554   | 776.0845  | 775.9412  | 775.7821  |
| 901.8878  | 901.90745  | 905.3851  | 905.2252  | 905.0683  |
| 1509.6243 | 1509.5964  | 1515.2025 | 1515.1735 | 1514.6341 |
| 1724.7735 | 1724.76615 | 1731.6577 | 1731.39   | 1730.9144 |
| 1825.8966 | 1825.8825  | 1833.2807 | 1833.0151 | 1832.4625 |
| 2038.3376 | 2038.4418  | 2046.9669 | 2046.7423 | 2046.2232 |
| 2151.6722 | 2151.6925  | 2160.7818 | 2160.3215 | 2159.704  |
| 1738.9592 | 1738.96245 | 1745.733  | 1745.5079 | 1744.9437 |
| 1542.4976 | 1542.56625 | 1548.6787 | 1548.2197 | 1547.786  |
| 1441.5374 | 1441.5175  | 1446.8058 | 1446.5699 | 1446.2333 |
| 1542.4598 | 1542.4694  | 1548.6498 | 1548.3152 | 1547.8931 |
| 1327.5337 | 1327.49685 | 1331.8161 | 1331.559  | 1331.3405 |
| 1428.548  | 1428.5308  | 1433.6688 | 1433.4584 | 1433.0459 |
| 1228.2623 | 1228.25355 | 1231.9624 | 1231.5928 | 1231.5321 |
| 1428.5372 | 1428.5523  | 1433.8949 | 1433.2884 | 1433.0878 |
| 1783.971  | 1783.95975 | 1790.8425 | 1790.6063 | 1790.0278 |
| 1100.0124 | 1100.0537  | 1103.431  | 1103.3609 | 1103.2938 |
| 1201.2493 | 1201.21615 | 1205.6026 | 1205.2011 | 1205.0007 |
| 970.9651  | 970.944    | 973.8876  | 973.7681  | 973.6256  |
| 1072.0608 | 1072.0498  | 1075.6854 | 1075.5061 | 1075.3539 |
| 841.8434  | 841.8683   | 844.3244  | 844.2043  | 844.0165  |
| 1216.2786 | 1216.3211  | 1220.0174 | 1219.9584 | 1219.766  |
| 3005.2953 | 3005.1329  | 3014.4991 | 3013.5679 | 3012.9434 |
| 1085.081  | 1085.1366  | 1088.4096 | 1088.2623 | 1088.1549 |
| 863.9327  | 863.8842   | 867.0263  | 866.7708  | 866.3806  |
| 2909.0792 | 2908.7211  | 2917.919  | 2918.6185 | 2920.7841 |
| 831.8216  | 831.6624   | 834.9932  | 834.8278  | 834.7781  |
| 1049.1103 | 1049.0503  | 1053.9932 | 1053.309  | 1053.5777 |
| 1163.2817 | 1163.1014  | 1168.8927 | 1169.0491 | 1167.9533 |
| 2435.6253 | 2435.6215  | 2445.8272 | 2445.285  | 2446.9274 |
| 2806.0977 | 2805.8654  | 2817.9841 | 2817.3397 | 2815.8432 |
| 933.9882  | 933.9583   | 937.9754  | 937.6103  | 937.4999  |
| 1452.6386 | 1452.4019  | 1459.1958 | 1459.1795 | 1459.4977 |
| 2690.9204 | 2690.7946  | 2701.924  | 2701.1552 | 2700.7322 |
| 1012.1391 | 1012.2719  | 1015.3401 | 1015.1345 | 1015.0244 |
| 1149.4536 | 1149.3522  | 1152.8412 | 1152.5374 | 1152.4303 |
| 2250.7525 | 2250.7418  | 2257.3905 | 2257.0327 | 2256.5633 |
| 825.8747  | 825.87     | 828.6392  | 828.4946  | 828.4265  |
| 1693.9243 | 1693.8611  | 1698.49   | 1698.1381 | 1698.8491 |
| 2064.3204 | 2064.1739  | 2070.3857 | 2070.1052 | 2069.6791 |
| 1163.2179 | 1163.1806  | 1165.0082 | 1164.7663 | 1164.4685 |
| 1405.4794 | 1405.4495  | 1408.7473 | 1408.5992 | 1408.508  |
| 1661.7716 | 1661.7803  | 1665.8588 | 1665.8121 | 1665.73   |
| 1420.4448 | 1420.4607  | 1424.3109 | 1424.2294 | 1424.0503 |
| 1257.167  | 1257.1752  | 1260.9887 | 1260.8475 | 1260.5695 |
| 1120.2917 | 1120.1529  | 1123.3201 | 1123.302  | 1123.0382 |
| 1005.0476 | 1004.9925  | 1008.5751 | 1008.4498 | 1007.9399 |

| smAKAP_1(1.00) | smAKAP_2(1.00) | smAKAP_3(1.00) | smAKAP_1(10.00) | smAKAP_2(10.00) |
|----------------|----------------|----------------|-----------------|-----------------|
| 875.8858       | 876.0172       | 875.8219       | 876.1925        | 876.0058        |
| 1007.2897      | 1007.5994      | 1007.2951      | 1007.6729       | 1007.3806       |
| 1461.9247      | 1461.9445      | 1461.5497      | 1462.1398       | 1462.0198       |
| 1333.2635      | 1333.4741      | 1333.1679      | 1333.6059       | 1333.2878       |
| 1462.8979      | 1463.1583      | 1462.7994      | 1463.3384       | 1463.0983       |
| 1245.6105      | 1246.25        | 1245.3866      | 1246.1259       | 1245.6383       |
| 953.6252       | 953.6387       | 953.4761       | 954.0269        | 953.5518        |
| 1117.9293      | 1117.833       | 1117.8449      | 1118.0838       | 1118.5103       |
| 1247.0279      | 1247.0409      | 1246.8594      | 1247.3036       | 1247.0861       |
| 1562.4127      | 1562.893       | 1562.3475      | 1562.8739       | 1562.6251       |
| 2302.9321      | 2303.749       | 2303.228       | 2303.7755       | 2303.3614       |
| 2679.2679      | 2680.1936      | 2679.496       | 2680.2904       | 2679.3808       |
| 3035.3151      | 3036.4336      | 3035.72        | 3036.5224       | 3035.7876       |
| 3051.1431      | 3052.5783      | 3051.691       | 3052.6855       | 3051.9177       |
| 988.6885       | 988.7739       | 988.5443       | 988.8685        | 988.7439        |
| 1118.2609      | 1118.34        | 1118.1384      | 1118.3965       | 1118.3081       |
| 2174.3471      | 2175.0752      | 2174.5287      | 2175.2001       | 2174.7808       |
| 2550.5406      | 2551.4906      | 2550.6352      | 2551.5333       | 2550.9829       |
| 2906.6098      | 2907.6331      | 2906.8637      | 2907.7906       | 2907.133        |
| 2922.4077      | 2923.9464      | 2923.0936      | 2923.9036       | 2923.029        |
| 1828.0794      | 1828.8081      | 1828.2185      | 1829.0177       | 1828.4852       |
| 2560.3588      | 2561.5366      | 2560.9805      | 2561.4461       | 2560.9208       |
| 842.6748       | 842.6066       | 842.4061       | 842.8592        | 842.6453        |
| 1583.8743      | 1584.1384      | 1583.7428      | 1584.4372       | 1584.1407       |
| 1959.2665      | 1960.0058      | 1959.558       | 1960.1391       | 1959.7044       |
| 2315.3617      | 2316.2982      | 2315.6938      | 2316.3756       | 2315.8614       |
| 2331.5592      | 2332.4917      | 2331.7713      | 2332.5346       | 2331.9457       |
| 2577.6599      | 2577.7422      | 2575.8117      | 2576.1261       | 2576.1022       |
| 3145.4997      | 3147.7261      | 3154.3579      | 3149.5649       | 3147.7575       |
| 1857.4291      | 1857.7656      | 1857.4782      | 1858.0232       | 1857.4199       |
| 2213.5429      | 2214.3378      | 2213.8073      | 2214.4348       | 2213.9641       |
| 2099.8325      | 2100.5657      | 2101.0499      | 2100.742        | 2099.6341       |
| 1580.4646      | 1580.8921      | 1580.5032      | 1580.9927       | 1580.6613       |
| 1936.5731      | 1937.071       | 1936.6516      | 1937.1975       | 1936.8528       |
| 1952.6331      | 1953.1205      | 1952.656       | 1953.2797       | 1952.8681       |
| 2408.2478      | 2408.9663      | 2409.0342      | 2409.2895       | 2409.3967       |
| 2767.1872      | 2767.6838      | 2766.0793      | 2767.4297       | 2768.4579       |
| 1807.2486      | 1807.7485      | 1807.3085      | 1807.8965       | 1807.4999       |
| 1492.7156      | 1492.7503      | 1490.9624      | 1492.8108       | 1490.3374       |
| 908.2689       | 908.2381       | 908.075        | 908.5674        | 908.2334        |
| 1582.3425      | 1582.6528      | 1582.2906      | 1582.8625       | 1582.5343       |
| 1134.0817      | 1134.0427      | 1133.8216      | 1134.3559       | 1134.0269       |
| 1205.8589      | 1206.0414      | 1205.6667      | 1206.1719       | 1205.8941       |
| 849.2942       | 849.1933       | 848.864        | 849.3356        | 849.1499        |
| 1248.8358      | 1249.0089      | 1248.2654      | 1249.1763       | 1248.7363       |
| 847.3546       | 847.4011       | 847.016        | 847.4721        | 847.3946        |

|           |           |            |           |           |
|-----------|-----------|------------|-----------|-----------|
| 1904.3192 | 1904.7572 | 1904.1539  | 1905.0152 | 1904.5226 |
| 776.1359  | 776.1347  | 775.8751   | 776.2782  | 776.1321  |
| 905.5995  | 905.4997  | 905.1164   | 905.7431  | 905.747   |
| 1515.4785 | 1515.1825 | 1514.908   | 1515.5882 | 1515.3341 |
| 1731.4671 | 1731.8395 | 1731.1858  | 1732.0592 | 1731.6784 |
| 1833.0402 | 1833.4327 | 1832.7709  | 1833.7263 | 1833.3044 |
| 2046.5151 | 2047.3281 | 2046.6879  | 2047.372  | 2047.0787 |
| 2160.6341 | 2161.1396 | 2160.3171  | 2161.5518 | 2160.9393 |
| 1745.5287 | 1745.8491 | 1745.1946  | 1746.2146 | 1745.7317 |
| 1548.5093 | 1548.7034 | 1547.9557  | 1549.0817 | 1548.4479 |
| 1446.7996 | 1446.9244 | 1446.4141  | 1447.1657 | 1446.8711 |
| 1547.9806 | 1548.6767 | 1548.2066  | 1548.988  | 1548.6146 |
| 1331.7783 | 1331.9128 | 1331.4778  | 1332.1291 | 1331.8104 |
| 1433.6161 | 1433.7262 | 1433.3643  | 1433.8635 | 1433.6377 |
| 1231.7737 | 1231.7723 | 1231.8513  | 1232.1151 | 1231.5874 |
| 1433.5629 | 1433.7939 | 1433.2733  | 1434.1861 | 1433.7699 |
| 1790.6486 | 1790.9143 | 1790.1193  | 1791.0781 | 1790.8356 |
| 1103.6217 | 1103.627  | 1103.2816  | 1103.8845 | 1103.2931 |
| 1205.5605 | 1205.4494 | 1205.111   | 1205.6749 | 1205.3183 |
| 973.8603  | 973.9143  | 973.6998   | 974.0428  | 973.9161  |
| 1075.6926 | 1075.7201 | 1075.4623  | 1075.8685 | 1075.7256 |
| 844.3171  | 844.3415  | 844.1408   | 844.4883  | 844.2681  |
| 1220.5549 | 1220.2231 | 1219.9429  | 1220.3886 | 1220.3082 |
| 3014.8869 | 3015.6189 | 3014.6135  | 3017.3525 | 3016.8336 |
| 1088.3916 | 1088.5518 | 1088.1592  | 1088.4904 | 1088.5372 |
| 867.0068  | 867.0633  | 866.453    | 866.9513  | 866.9122  |
| 2918.0338 | 2918.4274 | 2922.7781  | 2916.7191 | 2922.8923 |
| 835.3653  | 835.013   | 834.8282   | 835.2869  | 835.0237  |
| 1053.9346 | 1053.9206 | 1053.5354  | 1054.1178 | 1053.7464 |
| 1168.4818 | 1168.9695 | 1169.2822  | 1169.5888 | 1168.6231 |
| 2445.9925 | 2446.1049 | 2446.8449  | 2446.4595 | 2445.6183 |
| 2817.9269 | 2818.0083 | 2817.2216  | 2818.6923 | 2817.9753 |
| 937.8919  | 937.7735  | 937.5546   | 938.0211  | 937.9539  |
| 1459.6245 | 1459.6621 | 1459.6329  | 1460.126  | 1459.7549 |
| 2701.7095 | 2702.1784 | 2701.0048  | 2702.6673 | 2701.9087 |
| 1015.2343 | 1015.535  | 1015.2232  | 1015.6255 | 1015.3959 |
| 1152.6613 | 1152.863  | 1152.3934  | 1152.9993 | 1152.7159 |
| 2256.7627 | 2257.664  | 2257.0851  | 2257.7205 | 2257.1294 |
| 828.7439  | 828.825   | 828.5841   | 828.9355  | 828.7928  |
| 1698.2972 | 1698.6917 | 1698.49445 | 1698.6796 | 1698.5866 |
| 2070.0134 | 2070.6002 | 2070.0962  | 2070.685  | 2070.4019 |
| 1165.3907 | 1165.3136 | 1165.2575  | 1165.5043 | 1166.0602 |
| 1409.1447 | 1408.949  | 1408.799   | 1408.9828 | 1408.7475 |
| 1665.8823 | 1666.1063 | 1665.7551  | 1666.1241 | 1666.0235 |
| 1424.2331 | 1424.4983 | 1424.1066  | 1424.6663 | 1424.4602 |
| 1260.8052 | 1261.0949 | 1260.7469  | 1261.2206 | 1260.9565 |
| 1123.243  | 1123.4257 | 1123.1298  | 1123.8418 | 1123.5416 |
| 1008.4313 | 1008.6187 | 1008.2446  | 1008.6265 | 1008.4629 |

| smAKAP_3(10.00) | smAKAP_1(60.00) | smAKAP_2(60.00) | smAKAP_3(60.00) | smAKAP_4(60.00) |
|-----------------|-----------------|-----------------|-----------------|-----------------|
| 876.0179        | 876.1909        | 876.1744        | 875.9948        | 875.932         |
| 1007.6136       | 1007.7477       | 1007.7346       | 1007.5659       | 1007.5454       |
| 1461.9457       | 1462.1125       | 1462.0498       | 1462.2995       | 1462.5164       |
| 1333.5443       | 1333.6758       | 1333.6774       | 1333.656        | 1334.1251       |
| 1463.4182       | 1463.3568       | 1463.4143       | 1463.3586       | 1463.4199       |
| 1245.9732       | 1246.2566       | 1245.9326       | 1245.7898       | 1245.9263       |
| 953.8103        | 953.808         | 953.7448        | 953.9579        | 953.9444        |
| 1118.5378       | 1117.6159       | 1118.5888       | 1118.2793       | 1118.5442       |
| 1247.1807       | 1247.285        | 1247.34         | 1247.247        | 1247.375        |
| 1562.9117       | 1563.0675       | 1563.0359       | 1562.9063       | 1562.9479       |
| 2303.9185       | 2303.9565       | 2304.0129       | 2303.9784       | 2304.1342       |
| 2680.1476       | 2680.2836       | 2680.403        | 2680.4602       | 2680.7187       |
| 3036.506        | 3036.6732       | 3036.7418       | 3036.5834       | 3036.9192       |
| 3052.8085       | 3052.6953       | 3052.5981       | 3052.6586       | 3053.4937       |
| 988.802         | 988.8859        | 988.8534        | 988.8581        | 988.8802        |
| 1118.4287       | 1118.5233       | 1118.4025       | 1118.4593       | 1118.4484       |
| 2175.2289       | 2175.2878       | 2175.3084       | 2175.1723       | 2175.457        |
| 2551.4824       | 2551.5851       | 2551.5726       | 2551.5363       | 2552.4087       |
| 2907.6875       | 2907.8106       | 2907.8346       | 2907.7332       | 2908.4215       |
| 2923.8009       | 2923.8965       | 2923.896        | 2923.9086       | 2924.5554       |
| 1828.9876       | 1829.2029       | 1828.9956       | 1828.8994       | 1829.1562       |
| 2561.669        | 2561.5515       | 2561.718        | 2561.6032       | 2561.9571       |
| 842.6579        | 842.7321        | 842.7121        | 842.7303        | 842.6717        |
| 1584.2908       | 1584.4598       | 1584.3566       | 1584.3446       | 1584.361        |
| 1960.0942       | 1960.201        | 1960.1814       | 1960.0333       | 1960.3485       |
| 2316.356        | 2316.4227       | 2316.4548       | 2316.3643       | 2316.6432       |
| 2332.5306       | 2332.5847       | 2332.5944       | 2332.3414       | 2332.7608       |
| 2577.1279       | 2575.5134       | 2578.1274       | 2576.0038       | 2578.0639       |
| 3148.5383       | 3148.2879       | 3147.987        | 3147.7701       | 3148.3981       |
| 1857.9273       | 1857.8577       | 1857.9605       | 1857.8899       | 1857.5287       |
| 2214.3956       | 2214.45         | 2214.4846       | 2214.3032       | 2214.528        |
| 2100.6015       | 2100.7763       | 2100.7932       | 2101.1821       | 2101.1873       |
| 1580.8735       | 1581.042        | 1580.9705       | 1580.9163       | 1581.0321       |
| 1937.1759       | 1937.284        | 1937.2643       | 1937.1518       | 1937.3054       |
| 1953.2073       | 1953.4549       | 1953.3336       | 1953.2144       | 1953.2749       |
| 2409.1238       | 2409.6282       | 2409.3145       | 2410.9009       | 2409.3412       |
| 2769.137        | 2769.7331       | 2767.1375       | 2768.5798       | 2768.975        |
| 1807.8169       | 1807.926        | 1807.8497       | 1807.7829       | 1807.8953       |
| 1491.1072       | 1492.9747       | 1491.1505       | 1491.044        | 1492.6321       |
| 908.3126        | 908.5147        | 908.3572        | 908.3421        | 908.3024        |
| 1582.7998       | 1582.8467       | 1582.8422       | 1582.7618       | 1582.9899       |
| 1134.0602       | 1134.31         | 1134.1049       | 1134.0301       | 1134.1681       |
| 1206.0524       | 1206.2143       | 1206.1433       | 1206.1134       | 1206.0472       |
| 849.2258        | 849.3919        | 849.3265        | 849.3119        | 849.204         |
| 1248.9136       | 1249.0105       | 1249.1567       | 1249.0496       | 1249.1946       |
| 847.4813        | 847.5377        | 847.555         | 847.4807        | 847.5092        |



|           |           |           |            |           |
|-----------|-----------|-----------|------------|-----------|
| 1905.031  | 1905.0325 | 1905.0345 | 1904.907   | 1905.1728 |
| 776.1862  | 776.302   | 776.271   | 776.2756   | 776.2399  |
| 905.6925  | 905.7601  | 905.7837  | 905.6382   | 905.8295  |
| 1515.9225 | 1515.5163 | 1515.3848 | 1515.4113  | 1515.7305 |
| 1731.9506 | 1732.1174 | 1732.0937 | 1732.0027  | 1732.0562 |
| 1833.629  | 1833.8416 | 1833.7609 | 1833.6354  | 1833.7355 |
| 2047.5664 | 2047.6057 | 2047.6407 | 2047.5662  | 2047.8458 |
| 2161.6186 | 2161.6243 | 2161.6016 | 2161.6077  | 2161.6334 |
| 1746.0564 | 1746.2848 | 1746.23   | 1746.0428  | 1746.2099 |
| 1548.675  | 1548.9938 | 1548.9207 | 1548.7396  | 1548.6109 |
| 1447.0006 | 1447.1948 | 1447.142  | 1447.0961  | 1447.0354 |
| 1548.7612 | 1548.8999 | 1548.9553 | 1548.8599  | 1548.7114 |
| 1331.9378 | 1332.0824 | 1332.0536 | 1332.0065  | 1331.9107 |
| 1433.8243 | 1433.937  | 1433.8513 | 1433.7734  | 1433.7332 |
| 1231.9863 | 1232.1621 | 1232.1867 | 1232.1232  | 1232.1822 |
| 1433.9226 | 1434.1829 | 1433.9632 | 1433.8413  | 1433.8623 |
| 1791.0323 | 1791.2348 | 1791.238  | 1791.1708  | 1791.1836 |
| 1103.5847 | 1103.9028 | 1103.7794 | 1103.877   | 1103.7586 |
| 1205.4893 | 1205.8379 | 1205.5801 | 1205.5944  | 1205.5597 |
| 973.97    | 974.0793  | 974.0273  | 974.0541   | 974.0366  |
| 1075.7883 | 1075.8766 | 1075.8522 | 1075.8713  | 1075.8301 |
| 844.3904  | 844.4418  | 844.4203  | 844.4225   | 844.3837  |
| 1220.3423 | 1220.3894 | 1220.3127 | 1220.4795  | 1220.6081 |
| 3017.2259 | 3017.9518 | 3017.9789 | 3017.781   | 3017.2919 |
| 1088.386  | 1088.6309 | 1088.6313 | 1088.6736  | 1088.7407 |
| 866.759   | 867.0618  | 867.0854  | 866.9376   | 866.7061  |
| 2918.3052 | 2917.534  | 2918.3757 | 2918.1909  | 2919.5007 |
| 835.4444  | 835.4338  | 835.734   | 834.9084   | 835.314   |
| 1054.1001 | 1052.8726 | 1054.1171 | 1054.3386  | 1054.0146 |
| 1169.125  | 1169.4454 | 1169.5325 | 1169.48895 | 1169.2504 |
| 2446.1956 | 2446.9403 | 2446.2447 | 2446.5443  | 2447.9431 |
| 2818.3707 | 2818.4838 | 2818.4596 | 2818.3566  | 2816.7242 |
| 937.9784  | 938.2965  | 938.1071  | 938.3547   | 938.0416  |
| 1459.8927 | 1460.1991 | 1459.9172 | 1459.7549  | 1459.8404 |
| 2702.3907 | 2702.6257 | 2702.3487 | 2702.1991  | 2702.9813 |
| 1015.5823 | 1015.6537 | 1015.6473 | 1015.5976  | 1015.7047 |
| 1152.8855 | 1153.0446 | 1153.4222 | 1152.8196  | 1153.1493 |
| 2257.6753 | 2257.7664 | 2257.8096 | 2257.7053  | 2258.5448 |
| 828.8866  | 828.9966  | 828.9462  | 829.0525   | 828.8645  |
| 1698.5962 | 1698.7494 | 1698.5133 | 1698.6111  | 1699.796  |
| 2070.7352 | 2070.7373 | 2070.7873 | 2070.8825  | 2071.2329 |
| 1165.3437 | 1165.4111 | 1165.4429 | 1165.427   | 1165.4429 |
| 1409.0854 | 1409.0021 | 1409.1746 | 1409.0105  | 1409.0013 |
| 1666.066  | 1666.227  | 1666.2843 | 1666.345   | 1666.3461 |
| 1424.5728 | 1424.6908 | 1424.6866 | 1424.6344  | 1424.6687 |
| 1261.1609 | 1261.2517 | 1261.239  | 1261.18    | 1261.2465 |
| 1123.8655 | 1123.8985 | 1123.502  | 1123.6751  | 1123.6624 |
| 1008.8313 | 1008.7981 | 1008.8033 | 1008.6137  | 1008.7398 |

| smAKAP_1(240.00) | smAKAP_2(240.00) | smAKAP_3(240.00) |
|------------------|------------------|------------------|
| 875.8919         | 875.8594         | 875.957          |
| 1007.6004        | 1007.3396        | 1007.4556        |
| 1462.1042        | 1462.0767        | 1462.3124        |
| 1333.45          | 1333.4894        | 1333.6238        |
| 1463.3552        | 1463.4057        | 1463.1822        |
| 1245.8831        | 1245.9557        | 1245.6232        |
| 953.4971         | 953.6838         | 954.0297         |
| 1117.5689        | 1118.5366        | 1118.5581        |
| 1247.2826        | 1247.3738        | 1247.2323        |
| 1562.9356        | 1563.1172        | 1563.1381        |
| 2303.9567        | 2304.4565        | 2304.2508        |
| 2680.324         | 2681.2925        | 2681.3794        |
| 3036.6821        | 3037.6892        | 3037.4463        |
| 3052.9276        | 3054.301         | 3053.5516        |
| 988.7854         | 988.895          | 988.8787         |
| 1118.3954        | 1118.5208        | 1118.5882        |
| 2175.3613        | 2175.6588        | 2175.5532        |
| 2552.2985        | 2552.4825        | 2552.365         |
| 2907.8888        | 2908.7478        | 2908.6913        |
| 2924.0129        | 2924.9009        | 2924.6793        |
| 1828.9176        | 1829.2995        | 1829.1713        |
| 2561.9515        | 2562.4363        | 2562.4514        |
| 842.6102         | 842.8911         | 842.8228         |
| 1584.0962        | 1584.5541        | 1584.4905        |
| 1960.2164        | 1960.6312        | 1960.4939        |
| 2316.478         | 2316.9274        | 2316.8877        |
| 2332.6924        | 2333.0238        | 2333.0097        |
| 2576.8356        | 2577.3115        | 2576.9989        |
| 3148.1723        | 3148.4537        | 3148.4082        |
| 1857.5122        | 1857.8501        | 1858.0729        |
| 2214.5545        | 2214.8271        | 2214.8302        |
| 2101.2968        | 2100.4889        | 2100.9269        |
| 1580.842         | 1580.9901        | 1581.0846        |
| 1937.1342        | 1937.3818        | 1937.3408        |
| 1953.0428        | 1953.4793        | 1953.5085        |
| 2409.6354        | 2410.0418        | 2410.5207        |
| 2769.3235        | 2767.7141        | 2767.3243        |
| 1807.748         | 1807.982         | 1807.9014        |
| 1491.6141        | 1492.2592        | 1492.1886        |
| 908.2586         | 908.3629         | 908.2639         |
| 1582.7264        | 1582.8024        | 1582.9049        |
| 1133.7566        | 1133.902         | 1134.0707        |
| 1205.8891        | 1206.0098        | 1205.9363        |
| 849.0236         | 848.881          | 848.8471         |
| 1248.9168        | 1248.6478        | 1248.9952        |
| 847.4409         | 847.4733         | 847.488          |

|           |           |            |
|-----------|-----------|------------|
| 1904.9373 | 1905.2606 | 1905.1726  |
| 776.1741  | 776.233   | 776.2281   |
| 905.6447  | 905.5989  | 905.6563   |
| 1515.5451 | 1515.4482 | 1515.5454  |
| 1731.8818 | 1732.1272 | 1732.0984  |
| 1833.4844 | 1833.8233 | 1833.7325  |
| 2047.5914 | 2048.0167 | 2047.799   |
| 2161.4954 | 2161.9418 | 2161.6655  |
| 1746.0044 | 1746.1204 | 1746.0942  |
| 1548.4028 | 1547.7537 | 1548.2088  |
| 1446.8517 | 1447.0457 | 1446.9717  |
| 1548.6147 | 1548.8476 | 1548.7792  |
| 1331.748  | 1331.9558 | 1331.8818  |
| 1433.6065 | 1433.8056 | 1433.7444  |
| 1231.8176 | 1232.0214 | 1231.8315  |
| 1433.7228 | 1433.7029 | 1433.6977  |
| 1791.0976 | 1791.161  | 1791.2064  |
| 1103.6197 | 1103.5272 | 1103.9694  |
| 1205.4566 | 1205.6999 | 1205.585   |
| 973.8728  | 974.0907  | 974.0306   |
| 1075.7236 | 1075.9272 | 1075.8456  |
| 844.3086  | 844.4049  | 844.4442   |
| 1220.4366 | 1220.8105 | 1220.6212  |
| 3017.8258 | 3018.7662 | 3018.9751  |
| 1088.3912 | 1088.8178 | 1088.4594  |
| 866.9934  | 867.2012  | 866.9239   |
| 2923.8179 | 2918.6907 | 2919.4248  |
| 835.1484  | 835.7312  | 834.5124   |
| 1054.0498 | 1054.4195 | 1053.9034  |
| 1169.3726 | 1169.2573 | 1169.31495 |
| 2447.1238 | 2447.122  | 2447.2869  |
| 2818.2366 | 2819.3626 | 2819.2392  |
| 938.076   | 938.3915  | 937.9586   |
| 1459.7546 | 1459.7808 | 1459.8942  |
| 2702.2085 | 2702.7865 | 2703.0162  |
| 1015.5507 | 1015.7444 | 1015.6581  |
| 1153.0595 | 1153.0002 | 1153.02985 |
| 2257.8035 | 2258.3928 | 2258.3845  |
| 828.838   | 828.8123  | 828.8313   |
| 1698.9426 | 1699.4143 | 1698.895   |
| 2070.9026 | 2071.1633 | 2071.1389  |
| 1165.4415 | 1165.4415 | 1165.4415  |
| 1408.8838 | 1409.542  | 1409.2365  |
| 1666.2223 | 1666.2762 | 1666.43    |
| 1424.5031 | 1424.692  | 1424.6286  |
| 1261.1384 | 1261.3051 | 1261.2578  |
| 1123.5481 | 1123.6347 | 1123.6656  |
| 1008.5786 | 1008.8795 | 1008.8171  |

**Supplementary Table 3:** The smAKAP peptides of the hydrogen/deuterium exchange displaying the percentage of deuterium incorporation in the AKB

| Sequence                   | Start | End | Theoretical deuterium incorporation |           |
|----------------------------|-------|-----|-------------------------------------|-----------|
| MLVPRGSL                   | 25    | 32  | 6                                   | 872.9681  |
| MLVPRGSLM                  | 25    | 33  | 7                                   | 1004.1607 |
| KSKQTFPFPTIY               | 37    | 48  | 9                                   | 1457.5743 |
| SKQTFPFPTIY                | 38    | 48  | 8                                   | 1329.4246 |
| SKQTFPFPTIYE               | 38    | 49  | 9                                   | 1458.5572 |
| KQTFPFPTIY                 | 39    | 48  | 7                                   | 1242.3874 |
| QTFPFPTI                   | 40    | 47  | 5                                   | 950.9699  |
| QTFPFPTIY                  | 40    | 48  | 6                                   | 1114.9496 |
| QTFPFPTIYE                 | 40    | 49  | 7                                   | 1243.1523 |
| QTFPFPTIYEGEK              | 40    | 52  | 10                                  | 1557.6723 |
| QTFPFPTIYEGEKQHESEE        | 40    | 58  | 16                                  | 2297.3534 |
| QTFPFPTIYEGEKQHESEEPFM     | 40    | 61  | 18                                  | 2672.8106 |
| QTFPFPTIYEGEKQHESEEPFMPEE  | 40    | 64  | 20                                  | 3028.1024 |
| QTFPFPTIYEGEKQHESEEPFMPEE  | 40    | 64  | 20                                  | 3044.3838 |
| TFPFPTIY                   | 41    | 48  | 5                                   | 985.9171  |
| TFPFPTIYE                  | 41    | 49  | 6                                   | 1115.0149 |
| TFPFPTIYEGEKQHESEE         | 41    | 58  | 15                                  | 2169.2113 |
| TFPFPTIYEGEKQHESEEPFM      | 41    | 61  | 17                                  | 2544.7169 |
| TFPFPTIYEGEKQHESEEPFMPEE   | 41    | 64  | 19                                  | 2900.0303 |
| TFPFPTIYEGEKQHESEEPFMPEE   | 41    | 64  | 19                                  | 2916.1319 |
| FPTIYEGEKQHESEE            | 44    | 58  | 13                                  | 1823.8426 |
| FPTIYEGEKQHESEEPFMPEE      | 44    | 64  | 17                                  | 2554.6965 |
| TIYEGEK                    | 46    | 52  | 6                                   | 839.8534  |
| TIYEGEKQHESEE              | 46    | 58  | 12                                  | 1579.5578 |
| TIYEGEKQHESEEPFM           | 46    | 61  | 14                                  | 1955.0549 |
| TIYEGEKQHESEEPFMPEE        | 46    | 64  | 16                                  | 2310.2974 |
| TIYEGEKQHESEEPFMPEE        | 46    | 64  | 16                                  | 2326.3471 |
| TIYEGEKQHESEEPFMPEERC      | 46    | 66  | 18                                  | 2569.7465 |
| TIYEGEKQHESEEPFMPEERCLPRMA | 46    | 71  | 22                                  | 3137.9572 |
| IYEGEKQHESEEPFM            | 47    | 61  | 13                                  | 1853.9577 |
| IYEGEKQHESEEPFMPEE         | 47    | 64  | 15                                  | 2209.2677 |
| YEGEKQHESEEPFMPEE          | 48    | 64  | 14                                  | 2096.1082 |
| EGEKQHESEEPFM              | 49    | 61  | 11                                  | 1577.5969 |
| EGEKQHESEEPFMPEE           | 49    | 64  | 13                                  | 1932.8489 |
| EGEKQHESEEPFMPEE           | 49    | 64  | 13                                  | 1949.0095 |
| EGEKQHESEEPFMPEERCLP       | 49    | 68  | 16                                  | 2402.5411 |
| EGEKQHESEEPFMPEERCLPRMA    | 49    | 71  | 19                                  | 2761.1891 |
| GEKQHESEEPFMPEE            | 50    | 64  | 12                                  | 1803.743  |
| QHESEEPFMPEE               | 53    | 64  | 9                                   | 1489.4138 |
| PFMPEER                    | 59    | 65  | 4                                   | 905.9455  |
| PFMPEERCLPRMA              | 59    | 71  | 9                                   | 1577.8265 |
| MPEERCLPR                  | 61    | 69  | 6                                   | 1131.2184 |
| PEERCLPRMA                 | 62    | 71  | 7                                   | 1202.268  |
| RCLPRMA                    | 65    | 71  | 5                                   | 846.9461  |
| RCLPRMASPVN                | 65    | 75  | 8                                   | 1244.43   |
| ASPVNVKE                   | 71    | 78  | 6                                   | 843.8986  |
| ASPVNVKEEVKEPPGTNT         | 71    | 88  | 14                                  | 1897.0748 |
| SPVNVKE                    | 72    | 78  | 5                                   | 772.7478  |
| SPVNVKEE                   | 72    | 79  | 6                                   | 901.9271  |
| SPVNVKEEVKEPPG             | 72    | 85  | 10                                  | 1509.5685 |
| SPVNVKEEVKEPPGTN           | 72    | 87  | 12                                  | 1724.7588 |
| SPVNVKEEVKEPPGTNT          | 72    | 88  | 13                                  | 1825.8684 |
| SPVNVKEEVKEPPGTNTVI        | 72    | 90  | 15                                  | 2038.3509 |
| SPVNVKEEVKEPPGTNTVIL       | 72    | 91  | 16                                  | 2151.7992 |
| PVNVKEEVKEPPGTNT           | 73    | 88  | 12                                  | 1738.9657 |
| VNVKEEVKEPPGTN             | 74    | 87  | 11                                  | 1542.6349 |
| NVKEEVKEPPGTN              | 75    | 87  | 10                                  | 1441.4976 |
| NVKEEVKEPPGTNT             | 75    | 88  | 11                                  | 1542.479  |
| VKEEVKEPPGTN               | 76    | 87  | 9                                   | 1327.46   |
| VKEEVKEPPGTNT              | 76    | 88  | 10                                  | 1428.5136 |
| KEEVKEPPGTN                | 77    | 87  | 8                                   | 1228.2448 |
| KEEVKEPPGTNTV              | 77    | 89  | 10                                  | 1428.5674 |
| KEEVKEPPGTNTVILE           | 77    | 92  | 13                                  | 1783.9485 |
| EEVKEPPGTN                 | 78    | 87  | 7                                   | 1100.095  |

|                           |     |     |    |           |
|---------------------------|-----|-----|----|-----------|
| EEVKEPPGTNT               | 78  | 88  | 8  | 1201.183  |
| EVKEPPGTN                 | 79  | 87  | 6  | 970.9229  |
| EVKEPPGTNT                | 79  | 88  | 7  | 1072.0388 |
| VKEPPGTN                  | 80  | 87  | 5  | 841.8932  |
| YAHRLSQDIL                | 93  | 102 | 9  | 1216.23   |
| YAHRLSQDILCDALQQWACNNIKYH | 93  | 117 | 24 | 3005.2134 |
| HRLSQDILC                 | 95  | 103 | 8  | 1085.0762 |
| CDALQQW                   | 103 | 109 | 6  | 863.8259  |
| CDALQQWACNNIKYHDIPYIESEGP | 103 | 127 | 22 | 2908.966  |
| DALQQWA                   | 104 | 110 | 6  | 831.6893  |
| DALQQWACN                 | 104 | 112 | 8  | 1048.9461 |
| DALQQWACNN                | 104 | 113 | 9  | 1163.0893 |
| DALQQWACNNIKYHDIPYIE      | 104 | 123 | 18 | 2435.5446 |
| DALQQWACNNIKYHDIPYIESEGP  | 104 | 127 | 21 | 2806.0526 |
| ALQQWACN                  | 105 | 112 | 7  | 933.8785  |
| ALQQWACNNIKY              | 105 | 116 | 11 | 1452.6784 |
| ALQQWACNNIKYHDIPYIESEGP   | 105 | 127 | 20 | 2690.884  |
| WACNNIKY                  | 109 | 116 | 7  | 1012.0543 |
| WACNNIKYH                 | 109 | 117 | 8  | 1149.4724 |
| WACNNIKYHDIPYIESEGP       | 109 | 127 | 16 | 2250.5919 |
| ACNNIKY                   | 110 | 116 | 6  | 825.8565  |
| ACNNIKYHDIPYIE            | 110 | 123 | 12 | 1693.9021 |
| ACNNIKYHDIPYIESEGP        | 110 | 127 | 15 | 2064.2845 |
| NIKYHDIPY                 | 113 | 121 | 7  | 1163.3006 |
| NIKYHDIPYIE               | 113 | 123 | 9  | 1405.4918 |
| IKYHDIPYIESEGP            | 114 | 127 | 11 | 1661.7418 |
| YHDIPYIESEGP              | 116 | 127 | 9  | 1420.4736 |
| HDIPYIESEGP               | 117 | 127 | 8  | 1257.1702 |
| DIPYIESEGP                | 118 | 127 | 7  | 1120.2633 |
| IPYIESEGP                 | 119 | 127 | 6  | 1004.9356 |

P

smAKAP @ 0 min

smAKAP @ 10 sec

smAKAP @ 1 min

|           |            |           |           |           |           |           |           |
|-----------|------------|-----------|-----------|-----------|-----------|-----------|-----------|
| 873.0429  | 873.0484   | 876.0087  | 875.8238  | 875.6153  | 875.8858  | 876.0172  | 875.8219  |
| 1004.2165 | 1004.0906  | 1007.4223 | 1007.2484 | 1007.1472 | 1007.2897 | 1007.5994 | 1007.2951 |
| 1457.6341 | 1457.608   | 1461.7963 | 1461.5163 | 1461.5227 | 1461.9247 | 1461.9445 | 1461.5497 |
| 1329.3969 | 1329.3938  | 1333.4258 | 1333.2604 | 1333.0362 | 1333.2635 | 1333.4741 | 1333.1679 |
| 1458.5449 | 1458.5509  | 1463.1721 | 1462.9523 | 1462.6336 | 1462.8979 | 1463.1583 | 1462.7994 |
| 1242.3826 | 1242.2621  | 1246.1314 | 1245.5396 | 1245.8248 | 1245.6105 | 1246.25   | 1245.3866 |
| 950.9233  | 950.8219   | 953.5454  | 953.8153  | 953.1706  | 953.6252  | 953.6387  | 953.4761  |
| 1115.0174 | 1114.9828  | 1117.7482 | 1117.806  | 1117.6817 | 1117.9293 | 1117.833  | 1117.8449 |
| 1243.2436 | 1243.218   | 1246.9991 | 1246.8741 | 1246.6361 | 1247.0279 | 1247.0409 | 1246.8594 |
| 1557.7121 | 1557.6729  | 1562.6451 | 1562.5097 | 1562.1558 | 1562.4127 | 1562.893  | 1562.3475 |
| 2297.3423 | 2297.5016  | 2303.4475 | 2303.4388 | 2302.7219 | 2302.9321 | 2303.749  | 2303.228  |
| 2672.7239 | 2673.1599  | 2679.9598 | 2679.6439 | 2679.0045 | 2679.2679 | 2680.1936 | 2679.496  |
| 3028.222  | 3028.1528  | 3036.1674 | 3035.9556 | 3035.2301 | 3035.3151 | 3036.4336 | 3035.72   |
| 3044.3529 | 3044.1237  | 3052.2952 | 3052.0475 | 3051.3344 | 3051.1431 | 3052.5783 | 3051.691  |
| 985.9951  | 985.943    | 988.7184  | 988.565   | 988.4122  | 988.6885  | 988.7739  | 988.5443  |
| 1115.1029 | 1115.0434  | 1118.1972 | 1118.1133 | 1117.9386 | 1118.2609 | 1118.34   | 1118.1384 |
| 2169.2587 | 2169.2828  | 2174.8907 | 2174.7994 | 2174.1617 | 2174.3471 | 2175.0752 | 2174.5287 |
| 2544.7692 | 2544.726   | 2551.2586 | 2550.9555 | 2550.6431 | 2550.5406 | 2551.4906 | 2550.6352 |
| 2900.0468 | 2900.0219  | 2907.4128 | 2907.0902 | 2906.5715 | 2906.6098 | 2907.6331 | 2906.8637 |
| 2916.0888 | 2916.0685  | 2923.6481 | 2923.2004 | 2922.4722 | 2922.4077 | 2923.9464 | 2923.0936 |
| 1823.8246 | 1823.7806  | 1828.756  | 1828.5719 | 1828.0071 | 1828.0794 | 1828.8081 | 1828.2185 |
| 2554.6948 | 2554.6697  | 2561.228  | 2561.1515 | 2560.504  | 2560.3588 | 2561.5366 | 2560.9805 |
| 839.9052  | 839.8793   | 842.6168  | 842.3831  | 842.3481  | 842.6748  | 842.6066  | 842.4061  |
| 1579.5784 | 1579.5681  | 1584.1664 | 1583.9139 | 1583.7115 | 1583.8743 | 1584.1384 | 1583.7428 |
| 1955.0797 | 1955.086   | 1959.8661 | 1959.7979 | 1959.3008 | 1959.2665 | 1960.0058 | 1959.558  |
| 2310.372  | 2310.3723  | 2316.0636 | 2315.9336 | 2315.3753 | 2315.3617 | 2316.2982 | 2315.6938 |
| 2326.391  | 2326.3995  | 2332.2133 | 2332.0906 | 2331.5579 | 2331.5592 | 2332.4917 | 2331.7713 |
| 2569.6986 | 2569.6395  | 2575.8722 | 2576.851  | 2574.9102 | 2577.6599 | 2577.7422 | 2575.8117 |
| 3138.379  | 3138.8289  | 3146.5862 | 3154.4227 | 3158.2278 | 3145.4997 | 3147.7261 | 3154.3579 |
| 1853.9282 | 1853.8398  | 1857.7422 | 1857.6919 | 1857.2904 | 1857.4291 | 1857.7656 | 1857.4782 |
| 2209.2827 | 2209.2573  | 2214.1676 | 2214.0188 | 2213.5214 | 2213.5429 | 2214.3378 | 2213.8073 |
| 2096.0737 | 2095.9884  | 2100.4678 | 2100.391  | 2099.556  | 2099.8325 | 2100.5657 | 2101.0499 |
| 1577.6339 | 1577.5777  | 1580.8225 | 1580.6858 | 1580.414  | 1580.4646 | 1580.8921 | 1580.5032 |
| 1932.9059 | 1932.9382  | 1936.9968 | 1936.8739 | 1936.4709 | 1936.5731 | 1937.071  | 1936.6516 |
| 1948.9348 | 1948.963   | 1953.1533 | 1952.962  | 1952.4937 | 1952.6331 | 1953.1205 | 1952.656  |
| 2402.6171 | 2402.1894  | 2408.6939 | 2408.3974 | 2408.1678 | 2408.2478 | 2408.9663 | 2409.0342 |
| 2761.0444 | 2760.5944  | 2767.8487 | 2766.7337 | 2769.0155 | 2767.1872 | 2767.6838 | 2766.0793 |
| 1803.7849 | 1803.7558  | 1807.6664 | 1807.5109 | 1807.1576 | 1807.2486 | 1807.7485 | 1807.3085 |
| 1489.4499 | 1489.4659  | 1492.7362 | 1493.8732 | 1490.9911 | 1492.7156 | 1492.7503 | 1490.9624 |
| 906.0027  | 905.9719   | 908.0885  | 907.8715  | 907.9903  | 908.2689  | 908.2381  | 908.075   |
| 1577.8198 | 1577.819   | 1582.5508 | 1582.3711 | 1581.9309 | 1582.3425 | 1582.6528 | 1582.2906 |
| 1131.2271 | 1131.1756  | 1134.0753 | 1133.8515 | 1133.734  | 1134.0817 | 1134.0427 | 1133.8216 |
| 1202.3137 | 1202.3546  | 1205.9734 | 1205.7107 | 1205.5577 | 1205.8589 | 1206.0414 | 1205.6667 |
| 846.8874  | 846.8337   | 849.1598  | 849.0129  | 849.056   | 849.2942  | 849.1933  | 848.864   |
| 1244.3563 | 1244.4046  | 1248.8935 | 1248.5028 | 1248.5067 | 1248.8358 | 1249.0089 | 1248.2654 |
| 843.9311  | 843.91485  | 847.357   | 847.2393  | 846.9559  | 847.3546  | 847.4011  | 847.016   |
| 1897.0796 | 1897.0772  | 1904.534  | 1904.3305 | 1903.8235 | 1904.3192 | 1904.7572 | 1904.1539 |
| 772.763   | 772.7554   | 776.0845  | 775.9412  | 775.7821  | 776.1359  | 776.1347  | 775.8751  |
| 901.8878  | 901.90745  | 905.3851  | 905.2252  | 905.0683  | 905.5995  | 905.4997  | 905.1164  |
| 1509.6243 | 1509.5964  | 1515.2025 | 1515.1735 | 1514.6341 | 1515.4785 | 1515.1825 | 1514.908  |
| 1724.7735 | 1724.76615 | 1731.6577 | 1731.39   | 1730.9144 | 1731.4671 | 1731.8395 | 1731.1858 |
| 1825.8966 | 1825.8825  | 1833.2807 | 1833.0151 | 1832.4625 | 1833.0402 | 1833.4327 | 1832.7709 |
| 2038.3376 | 2038.4418  | 2046.9669 | 2046.7423 | 2046.2232 | 2046.5151 | 2047.3281 | 2046.6879 |
| 2151.6722 | 2151.6925  | 2160.7818 | 2160.3215 | 2159.704  | 2160.6341 | 2161.1396 | 2160.3171 |
| 1738.9592 | 1738.96245 | 1745.733  | 1745.5079 | 1744.9437 | 1745.5287 | 1745.8491 | 1745.1946 |
| 1542.4976 | 1542.56625 | 1548.6787 | 1548.2197 | 1547.786  | 1548.5093 | 1548.7034 | 1547.9557 |
| 1441.5374 | 1441.5175  | 1446.8058 | 1446.5699 | 1446.2333 | 1446.7996 | 1446.9244 | 1446.4141 |
| 1542.4598 | 1542.4694  | 1548.6498 | 1548.3152 | 1547.8931 | 1547.9806 | 1548.6767 | 1548.2066 |
| 1327.5337 | 1327.49685 | 1331.8161 | 1331.559  | 1331.3405 | 1331.7783 | 1331.9128 | 1331.4778 |
| 1428.548  | 1428.5308  | 1433.6688 | 1433.4584 | 1433.0459 | 1433.6161 | 1433.7262 | 1433.3643 |
| 1228.2623 | 1228.25355 | 1231.9624 | 1231.5928 | 1231.5321 | 1231.7737 | 1231.7723 | 1231.8513 |
| 1428.5372 | 1428.5523  | 1433.8949 | 1433.2884 | 1433.0878 | 1433.5629 | 1433.7939 | 1433.2733 |
| 1783.971  | 1783.95975 | 1790.8425 | 1790.6063 | 1790.0278 | 1790.6486 | 1790.9143 | 1790.1193 |
| 1100.0124 | 1100.0537  | 1103.431  | 1103.3609 | 1103.2938 | 1103.6217 | 1103.627  | 1103.2816 |

|           |            |           |           |           |           |           |            |
|-----------|------------|-----------|-----------|-----------|-----------|-----------|------------|
| 1201.2493 | 1201.21615 | 1205.6026 | 1205.2011 | 1205.0007 | 1205.5605 | 1205.4494 | 1205.111   |
| 970.9651  | 970.944    | 973.8876  | 973.7681  | 973.6256  | 973.8603  | 973.9143  | 973.6998   |
| 1072.0608 | 1072.0498  | 1075.6854 | 1075.5061 | 1075.3539 | 1075.6926 | 1075.7201 | 1075.4623  |
| 841.8434  | 841.8683   | 844.3244  | 844.2043  | 844.0165  | 844.3171  | 844.3415  | 844.1408   |
| 1216.2786 | 1216.3211  | 1220.0174 | 1219.9584 | 1219.766  | 1220.5549 | 1220.2231 | 1219.9429  |
| 3005.2953 | 3005.1329  | 3014.4991 | 3013.5679 | 3012.9434 | 3014.8869 | 3015.6189 | 3014.6135  |
| 1085.081  | 1085.1366  | 1088.4096 | 1088.2623 | 1088.1549 | 1088.3916 | 1088.5518 | 1088.1592  |
| 863.9327  | 863.8842   | 867.0263  | 866.7708  | 866.3806  | 867.0068  | 867.0633  | 866.453    |
| 2909.0792 | 2908.7211  | 2917.919  | 2918.6185 | 2920.7841 | 2918.0338 | 2918.4274 | 2922.7781  |
| 831.8216  | 831.6624   | 834.9932  | 834.8278  | 834.7781  | 835.3653  | 835.013   | 834.8282   |
| 1049.1103 | 1049.0503  | 1053.9932 | 1053.309  | 1053.5777 | 1053.9346 | 1053.9206 | 1053.5354  |
| 1163.2817 | 1163.1014  | 1168.8927 | 1169.0491 | 1167.9533 | 1168.4818 | 1168.9695 | 1169.2822  |
| 2435.6253 | 2435.6215  | 2445.8272 | 2445.285  | 2446.9274 | 2445.9925 | 2446.1049 | 2446.8449  |
| 2806.0977 | 2805.8654  | 2817.9841 | 2817.3397 | 2815.8432 | 2817.9269 | 2818.0083 | 2817.2216  |
| 933.9882  | 933.9583   | 937.9754  | 937.6103  | 937.4999  | 937.8919  | 937.7735  | 937.5546   |
| 1452.6386 | 1452.4019  | 1459.1958 | 1459.1795 | 1459.4977 | 1459.6245 | 1459.6621 | 1459.6329  |
| 2690.9204 | 2690.7946  | 2701.924  | 2701.1552 | 2700.7322 | 2701.7095 | 2702.1784 | 2701.0048  |
| 1012.1391 | 1012.2719  | 1015.3401 | 1015.1345 | 1015.0244 | 1015.2343 | 1015.535  | 1015.2232  |
| 1149.4536 | 1149.3522  | 1152.8412 | 1152.5374 | 1152.4303 | 1152.6613 | 1152.863  | 1152.3934  |
| 2250.7525 | 2250.7418  | 2257.3905 | 2257.0327 | 2256.5633 | 2256.7627 | 2257.664  | 2257.0851  |
| 825.8747  | 825.87     | 828.6392  | 828.4946  | 828.4265  | 828.7439  | 828.825   | 828.5841   |
| 1693.9243 | 1693.8611  | 1698.49   | 1698.1381 | 1698.8491 | 1698.2972 | 1698.6917 | 1698.49445 |
| 2064.3204 | 2064.1739  | 2070.3857 | 2070.1052 | 2069.6791 | 2070.0134 | 2070.6002 | 2070.0962  |
| 1163.2179 | 1163.1806  | 1165.0082 | 1164.7663 | 1164.4685 | 1165.3907 | 1165.3136 | 1165.2575  |
| 1405.4794 | 1405.4495  | 1408.7473 | 1408.5992 | 1408.508  | 1409.1447 | 1408.949  | 1408.799   |
| 1661.7716 | 1661.7803  | 1665.8588 | 1665.8121 | 1665.73   | 1665.8823 | 1666.1063 | 1665.7551  |
| 1420.4448 | 1420.4607  | 1424.3109 | 1424.2294 | 1424.0503 | 1424.2331 | 1424.4983 | 1424.1066  |
| 1257.167  | 1257.1752  | 1260.9887 | 1260.8475 | 1260.5695 | 1260.8052 | 1261.0949 | 1260.7469  |
| 1120.2917 | 1120.1529  | 1123.3201 | 1123.302  | 1123.0382 | 1123.243  | 1123.4257 | 1123.1298  |
| 1005.0476 | 1004.9925  | 1008.5751 | 1008.4498 | 1007.9399 | 1008.4313 | 1008.6187 | 1008.2446  |

| smAKAP @ 10 min |           |           | smAKAP @ 60 min |           |           |           |           |
|-----------------|-----------|-----------|-----------------|-----------|-----------|-----------|-----------|
| 876.1925        | 876.0058  | 876.0179  | 876.1909        | 876.1744  | 875.9948  | 875.932   | 875.8919  |
| 1007.6729       | 1007.3806 | 1007.6136 | 1007.7477       | 1007.7346 | 1007.5659 | 1007.5454 | 1007.6004 |
| 1462.1398       | 1462.0198 | 1461.9457 | 1462.1125       | 1462.0498 | 1462.2995 | 1462.5164 | 1462.1042 |
| 1333.6059       | 1333.2878 | 1333.5443 | 1333.6758       | 1333.6774 | 1333.656  | 1334.1251 | 1333.45   |
| 1463.3384       | 1463.0983 | 1463.4182 | 1463.3568       | 1463.4143 | 1463.3586 | 1463.4199 | 1463.3552 |
| 1246.1259       | 1245.6383 | 1245.9732 | 1246.2566       | 1245.9326 | 1245.7898 | 1245.9263 | 1245.8831 |
| 954.0269        | 953.5518  | 953.8103  | 953.808         | 953.7448  | 953.9579  | 953.9444  | 953.4971  |
| 1118.0838       | 1118.5103 | 1118.5378 | 1117.6159       | 1118.5888 | 1118.2793 | 1118.5442 | 1117.5689 |
| 1247.3036       | 1247.0861 | 1247.1807 | 1247.285        | 1247.34   | 1247.247  | 1247.375  | 1247.2826 |
| 1562.8739       | 1562.6251 | 1562.9117 | 1563.0675       | 1563.0359 | 1562.9063 | 1562.9479 | 1562.9356 |
| 2303.7755       | 2303.3614 | 2303.9185 | 2303.9565       | 2304.0129 | 2303.9784 | 2304.1342 | 2303.9567 |
| 2680.2904       | 2679.3808 | 2680.1476 | 2680.2836       | 2680.403  | 2680.4602 | 2680.7187 | 2680.324  |
| 3036.5224       | 3035.7876 | 3036.506  | 3036.6732       | 3036.7418 | 3036.5834 | 3036.9192 | 3036.6821 |
| 3052.6855       | 3051.9177 | 3052.8085 | 3052.6953       | 3052.5981 | 3052.6586 | 3053.4937 | 3052.9276 |
| 988.8685        | 988.7439  | 988.802   | 988.8859        | 988.8534  | 988.8581  | 988.8802  | 988.7854  |
| 1118.3965       | 1118.3081 | 1118.4287 | 1118.5233       | 1118.4025 | 1118.4593 | 1118.4484 | 1118.3954 |
| 2175.2001       | 2174.7808 | 2175.2289 | 2175.2878       | 2175.3084 | 2175.1723 | 2175.457  | 2175.3613 |
| 2551.5333       | 2550.9829 | 2551.4824 | 2551.5851       | 2551.5726 | 2551.5363 | 2552.4087 | 2552.2985 |
| 2907.7906       | 2907.133  | 2907.6875 | 2907.8106       | 2907.8346 | 2907.7332 | 2908.4215 | 2907.8888 |
| 2923.9036       | 2923.029  | 2923.8009 | 2923.8965       | 2923.896  | 2923.9086 | 2924.5554 | 2924.0129 |
| 1829.0177       | 1828.4852 | 1828.9876 | 1829.2029       | 1828.9956 | 1828.8994 | 1829.1562 | 1828.9176 |
| 2561.4461       | 2560.9208 | 2561.669  | 2561.5515       | 2561.718  | 2561.6032 | 2561.9571 | 2561.9515 |
| 842.8592        | 842.6453  | 842.6579  | 842.7321        | 842.7121  | 842.7303  | 842.6717  | 842.6102  |
| 1584.4372       | 1584.1407 | 1584.2908 | 1584.4598       | 1584.3566 | 1584.3446 | 1584.361  | 1584.0962 |
| 1960.1391       | 1959.7044 | 1960.0942 | 1960.201        | 1960.1814 | 1960.0333 | 1960.3485 | 1960.2164 |
| 2316.3756       | 2315.8614 | 2316.356  | 2316.4227       | 2316.4548 | 2316.3643 | 2316.6432 | 2316.478  |
| 2332.5346       | 2331.9457 | 2332.5306 | 2332.5847       | 2332.5944 | 2332.3414 | 2332.7608 | 2332.6924 |
| 2576.1261       | 2576.1022 | 2577.1279 | 2575.5134       | 2578.1274 | 2576.0038 | 2578.0639 | 2576.8356 |
| 3149.5649       | 3147.7575 | 3148.5383 | 3148.2879       | 3147.987  | 3147.7701 | 3148.3981 | 3148.1723 |
| 1858.0232       | 1857.4199 | 1857.9273 | 1857.8577       | 1857.9605 | 1857.8899 | 1857.5287 | 1857.5122 |
| 2214.4348       | 2213.9641 | 2214.3956 | 2214.45         | 2214.4846 | 2214.3032 | 2214.528  | 2214.5545 |
| 2100.742        | 2099.6341 | 2100.6015 | 2100.7763       | 2100.7932 | 2101.1821 | 2101.1873 | 2101.2968 |
| 1580.9927       | 1580.6613 | 1580.8735 | 1581.042        | 1580.9705 | 1580.9163 | 1581.0321 | 1580.842  |
| 1937.1975       | 1936.8528 | 1937.1759 | 1937.284        | 1937.2643 | 1937.1518 | 1937.3054 | 1937.1342 |
| 1953.2797       | 1952.8681 | 1953.2073 | 1953.4549       | 1953.3336 | 1953.2144 | 1953.2749 | 1953.0428 |
| 2409.2895       | 2409.3967 | 2409.1238 | 2409.6282       | 2409.3145 | 2410.9009 | 2409.3412 | 2409.6354 |
| 2767.4297       | 2768.4579 | 2769.137  | 2769.7331       | 2767.1375 | 2768.5798 | 2768.975  | 2769.3235 |
| 1807.8965       | 1807.4999 | 1807.8169 | 1807.926        | 1807.8497 | 1807.7829 | 1807.8953 | 1807.748  |
| 1492.8108       | 1490.3374 | 1491.1072 | 1492.9747       | 1491.1505 | 1491.044  | 1492.6321 | 1491.6141 |
| 908.5674        | 908.2334  | 908.3126  | 908.5147        | 908.3572  | 908.3421  | 908.3024  | 908.2586  |
| 1582.8625       | 1582.5343 | 1582.7998 | 1582.8467       | 1582.8422 | 1582.7618 | 1582.9899 | 1582.7264 |
| 1134.3559       | 1134.0269 | 1134.0602 | 1134.31         | 1134.1049 | 1134.0301 | 1134.1681 | 1133.7566 |
| 1206.1719       | 1205.8941 | 1206.0524 | 1206.2143       | 1206.1433 | 1206.1134 | 1206.0472 | 1205.8891 |
| 849.3356        | 849.1499  | 849.2258  | 849.3919        | 849.3265  | 849.3119  | 849.204   | 849.0236  |
| 1249.1763       | 1248.7363 | 1248.9136 | 1249.0105       | 1249.1567 | 1249.0496 | 1249.1946 | 1248.9168 |
| 847.4721        | 847.3946  | 847.4813  | 847.5377        | 847.555   | 847.4807  | 847.5092  | 847.4409  |
| 1905.0152       | 1904.5226 | 1905.031  | 1905.0325       | 1905.0345 | 1904.907  | 1905.1728 | 1904.9373 |
| 776.2782        | 776.1321  | 776.1862  | 776.302         | 776.271   | 776.2756  | 776.2399  | 776.1741  |
| 905.7431        | 905.747   | 905.6925  | 905.7601        | 905.7837  | 905.6382  | 905.8295  | 905.6447  |
| 1515.5882       | 1515.3341 | 1515.9225 | 1515.5163       | 1515.3848 | 1515.4113 | 1515.7305 | 1515.5451 |
| 1732.0592       | 1731.6784 | 1731.9506 | 1732.1174       | 1732.0937 | 1732.0027 | 1732.0562 | 1731.8818 |
| 1833.7263       | 1833.3044 | 1833.629  | 1833.8416       | 1833.7609 | 1833.6354 | 1833.7355 | 1833.4844 |
| 2047.372        | 2047.0787 | 2047.5664 | 2047.6057       | 2047.6407 | 2047.5662 | 2047.8458 | 2047.5914 |
| 2161.5518       | 2160.9393 | 2161.6186 | 2161.6243       | 2161.6016 | 2161.6077 | 2161.6334 | 2161.4954 |
| 1746.2146       | 1745.7317 | 1746.0564 | 1746.2848       | 1746.23   | 1746.0428 | 1746.2099 | 1746.0044 |
| 1549.0817       | 1548.4479 | 1548.675  | 1548.9938       | 1548.9207 | 1548.7396 | 1548.6109 | 1548.4028 |
| 1447.1657       | 1446.8711 | 1447.0006 | 1447.1948       | 1447.142  | 1447.0961 | 1447.0354 | 1446.8517 |
| 1548.988        | 1548.6146 | 1548.7612 | 1548.8999       | 1548.9553 | 1548.8599 | 1548.7114 | 1548.6147 |
| 1332.1291       | 1331.8104 | 1331.9378 | 1332.0824       | 1332.0536 | 1332.0065 | 1331.9107 | 1331.748  |
| 1433.8635       | 1433.6377 | 1433.8243 | 1433.937        | 1433.8513 | 1433.7734 | 1433.7332 | 1433.6065 |
| 1232.1151       | 1231.5874 | 1231.9863 | 1232.1621       | 1232.1867 | 1232.1232 | 1232.1822 | 1231.8176 |
| 1434.1861       | 1433.7699 | 1433.9226 | 1434.1829       | 1433.9632 | 1433.8413 | 1433.8623 | 1433.7228 |
| 1791.0781       | 1790.8356 | 1791.0323 | 1791.2348       | 1791.238  | 1791.1708 | 1791.1836 | 1791.0976 |
| 1103.8845       | 1103.2931 | 1103.5847 | 1103.9028       | 1103.7794 | 1103.877  | 1103.7586 | 1103.6197 |



|           |           |           |           |           |            |           |           |
|-----------|-----------|-----------|-----------|-----------|------------|-----------|-----------|
| 1205.6749 | 1205.3183 | 1205.4893 | 1205.8379 | 1205.5801 | 1205.5944  | 1205.5597 | 1205.4566 |
| 974.0428  | 973.9161  | 973.97    | 974.0793  | 974.0273  | 974.0541   | 974.0366  | 973.8728  |
| 1075.8685 | 1075.7256 | 1075.7883 | 1075.8766 | 1075.8522 | 1075.8713  | 1075.8301 | 1075.7236 |
| 844.4883  | 844.2681  | 844.3904  | 844.4418  | 844.4203  | 844.4225   | 844.3837  | 844.3086  |
| 1220.3886 | 1220.3082 | 1220.3423 | 1220.3894 | 1220.3127 | 1220.4795  | 1220.6081 | 1220.4366 |
| 3017.3525 | 3016.8336 | 3017.2259 | 3017.9518 | 3017.9789 | 3017.781   | 3017.2919 | 3017.8258 |
| 1088.4904 | 1088.5372 | 1088.386  | 1088.6309 | 1088.6313 | 1088.6736  | 1088.7407 | 1088.3912 |
| 866.9513  | 866.9122  | 866.759   | 867.0618  | 867.0854  | 866.9376   | 866.7061  | 866.9934  |
| 2916.7191 | 2922.8923 | 2918.3052 | 2917.534  | 2918.3757 | 2918.1909  | 2919.5007 | 2923.8179 |
| 835.2869  | 835.0237  | 835.4444  | 835.4338  | 835.734   | 834.9084   | 835.314   | 835.1484  |
| 1054.1178 | 1053.7464 | 1054.1001 | 1052.8726 | 1054.1171 | 1054.3386  | 1054.0146 | 1054.0498 |
| 1169.5888 | 1168.6231 | 1169.125  | 1169.4454 | 1169.5325 | 1169.48895 | 1169.2504 | 1169.3726 |
| 2446.4595 | 2445.6183 | 2446.1956 | 2446.9403 | 2446.2447 | 2446.5443  | 2447.9431 | 2447.1238 |
| 2818.6923 | 2817.9753 | 2818.3707 | 2818.4838 | 2818.4596 | 2818.3566  | 2816.7242 | 2818.2366 |
| 938.0211  | 937.9539  | 937.9784  | 938.2965  | 938.1071  | 938.3547   | 938.0416  | 938.076   |
| 1460.126  | 1459.7549 | 1459.8927 | 1460.1991 | 1459.9172 | 1459.7549  | 1459.8404 | 1459.7546 |
| 2702.6673 | 2701.9087 | 2702.3907 | 2702.6257 | 2702.3487 | 2702.1991  | 2702.9813 | 2702.2085 |
| 1015.6255 | 1015.3959 | 1015.5823 | 1015.6537 | 1015.6473 | 1015.5976  | 1015.7047 | 1015.5507 |
| 1152.9993 | 1152.7159 | 1152.8855 | 1153.0446 | 1153.4222 | 1152.8196  | 1153.1493 | 1153.0595 |
| 2257.7205 | 2257.1294 | 2257.6753 | 2257.7664 | 2257.8096 | 2257.7053  | 2258.5448 | 2257.8035 |
| 828.9355  | 828.7928  | 828.8866  | 828.9966  | 828.9462  | 829.0525   | 828.8645  | 828.838   |
| 1698.6796 | 1698.5866 | 1698.5962 | 1698.7494 | 1698.5133 | 1698.6111  | 1699.796  | 1698.9426 |
| 2070.685  | 2070.4019 | 2070.7352 | 2070.7373 | 2070.7873 | 2070.8825  | 2071.2329 | 2070.9026 |
| 1165.5043 | 1166.0602 | 1165.3437 | 1165.4111 | 1165.4429 | 1165.427   | 1165.4429 | 1165.4415 |
| 1408.9828 | 1408.7475 | 1409.0854 | 1409.0021 | 1409.1746 | 1409.0105  | 1409.0013 | 1408.8838 |
| 1666.1241 | 1666.0235 | 1666.066  | 1666.227  | 1666.2843 | 1666.345   | 1666.3461 | 1666.2223 |
| 1424.6663 | 1424.4602 | 1424.5728 | 1424.6908 | 1424.6866 | 1424.6344  | 1424.6687 | 1424.5031 |
| 1261.2206 | 1260.9565 | 1261.1609 | 1261.2517 | 1261.239  | 1261.18    | 1261.2465 | 1261.1384 |
| 1123.8418 | 1123.5416 | 1123.8655 | 1123.8985 | 1123.502  | 1123.6751  | 1123.6624 | 1123.5481 |
| 1008.6265 | 1008.4629 | 1008.8313 | 1008.7981 | 1008.8033 | 1008.6137  | 1008.7398 | 1008.5786 |

smAKAP @ 240 min

Average mass of peptide (Daltons)

|           |           | Time (min) | 0           | 0.167       | 1           | 10          |
|-----------|-----------|------------|-------------|-------------|-------------|-------------|
| 875.8594  | 875.957   |            |             |             |             |             |
| 1007.3396 | 1007.4556 |            | 873.0198    | 875.8159333 | 875.9083    | 876.0720667 |
| 1462.0767 | 1462.3124 |            | 1004.155933 | 1007.272633 | 1007.394733 | 1007.5557   |
| 1333.4894 | 1333.6238 |            | 1457.605467 | 1461.611767 | 1461.8063   | 1462.0351   |
| 1463.4057 | 1463.1822 |            | 1329.4051   | 1333.2408   | 1333.301833 | 1333.479333 |
| 1245.9557 | 1245.6232 |            | 1458.551    | 1462.919333 | 1462.951867 | 1463.284967 |
| 953.6838  | 954.0297  |            | 1242.344033 | 1245.831933 | 1245.749033 | 1245.912467 |
| 1118.5366 | 1118.5581 |            | 950.9050333 | 953.5104333 | 953.58      | 953.7963333 |
| 1247.3738 | 1247.2323 |            | 1114.983267 | 1117.7453   | 1117.869067 | 1118.3773   |
| 1563.1172 | 1563.1381 |            | 1243.204633 | 1246.836433 | 1246.976067 | 1247.190133 |
| 2304.4565 | 2304.2508 |            | 1557.685767 | 1562.436867 | 1562.551067 | 1562.803567 |
| 2681.2925 | 2681.3794 |            | 2297.3991   | 2303.202733 | 2303.303033 | 2303.685133 |
| 3037.6892 | 3037.4463 |            | 2672.898133 | 2679.536067 | 2679.6525   | 2679.9396   |
| 3054.301  | 3053.5516 |            | 3028.159067 | 3035.784367 | 3035.8229   | 3036.272    |
| 988.895   | 988.8787  |            | 3044.2868   | 3051.892367 | 3051.804133 | 3052.470567 |
| 1118.5208 | 1118.5882 |            | 985.9517333 | 988.5652    | 988.6689    | 988.8048    |
| 2175.6588 | 2175.5532 |            | 1115.053733 | 1118.083033 | 1118.246433 | 1118.377767 |
| 2552.4825 | 2552.365  |            | 2169.250933 | 2174.617267 | 2174.650333 | 2175.069933 |
| 2908.7478 | 2908.6913 |            | 2544.737367 | 2550.9524   | 2550.8888   | 2551.332867 |
| 2924.9009 | 2924.6793 |            | 2900.033    | 2907.024833 | 2907.035533 | 2907.537033 |
| 1829.2995 | 1829.1713 |            | 2916.0964   | 2923.1069   | 2923.149233 | 2923.577833 |
| 2562.4363 | 2562.4514 |            | 1823.815933 | 1828.445    | 1828.368667 | 1828.830167 |
| 842.8911  | 842.8228  |            | 2554.687    | 2560.961167 | 2560.958633 | 2561.3453   |
| 1584.5541 | 1584.4905 |            | 839.8793    | 842.4493333 | 842.5625    | 842.7208    |
| 1960.6312 | 1960.4939 |            | 1579.5681   | 1583.9306   | 1583.9185   | 1584.289567 |
| 2316.9274 | 2316.8877 |            | 1955.073533 | 1959.654933 | 1959.6101   | 1959.979233 |
| 2333.0238 | 2333.0097 |            | 2310.347233 | 2315.790833 | 2315.784567 | 2316.197667 |
| 2577.3115 | 2576.9989 |            | 2326.3792   | 2331.953933 | 2331.940733 | 2332.336967 |
| 3148.4537 | 3148.4082 |            | 2569.694867 | 2575.8778   | 2577.071267 | 2576.452067 |
| 1857.8501 | 1858.0729 |            | 3138.388367 | 3153.0789   | 3149.194567 | 3148.620233 |
| 2214.8271 | 2214.8302 |            | 1853.908567 | 1857.574833 | 1857.557633 | 1857.790133 |
| 2100.4889 | 2100.9269 |            | 2209.269233 | 2213.9026   | 2213.896    | 2214.264833 |
| 1580.9901 | 1581.0846 |            | 2096.056767 | 2100.138267 | 2100.4827   | 2100.325867 |
| 1937.3818 | 1937.3408 |            | 1577.602833 | 1580.640767 | 1580.619967 | 1580.8425   |
| 1953.4793 | 1953.5085 |            | 1932.897667 | 1936.780533 | 1936.765233 | 1937.0754   |
| 2410.0418 | 2410.5207 |            | 1948.9691   | 1952.869667 | 1952.8032   | 1953.118367 |
| 2767.7141 | 2767.3243 |            | 2402.4492   | 2408.4197   | 2408.749433 | 2409.27     |
| 1807.982  | 1807.9014 |            | 2760.942633 | 2767.865967 | 2766.983433 | 2768.341533 |
| 1492.2592 | 1492.1886 |            | 1803.761233 | 1807.444967 | 1807.4352   | 1807.737767 |
| 908.3629  | 908.2639  |            | 1489.4432   | 1492.5335   | 1492.142767 | 1491.418467 |
| 1582.8024 | 1582.9049 |            | 905.9733667 | 907.9834333 | 908.194     | 908.3711333 |
| 1133.902  | 1134.0707 |            | 1577.821767 | 1582.284267 | 1582.428633 | 1582.7322   |
| 1206.0098 | 1205.9363 |            | 1131.207033 | 1133.886933 | 1133.982    | 1134.147667 |
| 848.881   | 848.8471  |            | 1202.3121   | 1205.747267 | 1205.855667 | 1206.039467 |
| 1248.6478 | 1248.9952 |            | 846.8890667 | 849.0762333 | 849.1171667 | 849.2371    |
| 847.4733  | 847.488   |            | 1244.396967 | 1248.634333 | 1248.703367 | 1248.942067 |
| 1905.2606 | 1905.1726 |            | 843.91485   | 847.1840667 | 847.2572333 | 847.4493333 |
| 776.233   | 776.2281  |            | 1897.0772   | 1904.229333 | 1904.4101   | 1904.856267 |
| 905.5989  | 905.6563  |            | 772.7554    | 775.9359333 | 776.0485667 | 776.1988333 |
| 1515.4482 | 1515.5454 |            | 901.90745   | 905.2262    | 905.4052    | 905.7275333 |
| 1732.1272 | 1732.0984 |            | 1509.5964   | 1515.003367 | 1515.189667 | 1515.614933 |
| 1833.8233 | 1833.7325 |            | 1724.76615  | 1731.3207   | 1731.497467 | 1731.896067 |
| 2048.0167 | 2047.799  |            | 1825.8825   | 1832.919433 | 1833.081267 | 1833.553233 |
| 2161.9418 | 2161.6655 |            | 2038.376767 | 2046.644133 | 2046.8437   | 2047.339033 |
| 1746.1204 | 1746.0942 |            | 2151.7213   | 2160.2691   | 2160.696933 | 2161.3699   |
| 1547.7537 | 1548.2088 |            | 1738.96245  | 1745.394867 | 1745.524133 | 1746.0009   |
| 1447.0457 | 1446.9717 |            | 1542.56625  | 1548.228133 | 1548.389467 | 1548.734867 |
| 1548.8476 | 1548.7792 |            | 1441.5175   | 1446.536333 | 1446.7127   | 1447.012467 |
| 1331.9558 | 1331.8818 |            | 1542.4694   | 1548.286033 | 1548.287967 | 1548.787933 |
| 1433.8056 | 1433.7444 |            | 1327.49685  | 1331.571867 | 1331.722967 | 1331.9591   |
| 1232.0214 | 1231.8315 |            | 1428.5308   | 1433.391033 | 1433.568867 | 1433.775167 |
| 1433.7029 | 1433.6977 |            | 1228.25355  | 1231.695767 | 1231.7991   | 1231.896267 |
| 1791.161  | 1791.2064 |            | 1428.5523   | 1433.4237   | 1433.543367 | 1433.959533 |
| 1103.5272 | 1103.9694 |            | 1783.95975  | 1790.4922   | 1790.560733 | 1790.982    |

|           |            |             |             |             |             |
|-----------|------------|-------------|-------------|-------------|-------------|
| 1205.6999 | 1205.585   | 1100.0537   | 1103.3619   | 1103.5101   | 1103.587433 |
| 974.0907  | 974.0306   | 1201.21615  | 1205.268133 | 1205.373633 | 1205.494167 |
| 1075.9272 | 1075.8456  | 970.944     | 973.7604333 | 973.8248    | 973.9763    |
| 844.4049  | 844.4442   | 1072.0498   | 1075.515133 | 1075.625    | 1075.794133 |
| 1220.8105 | 1220.6212  | 841.8683    | 844.1817333 | 844.2664667 | 844.3822667 |
| 3018.7662 | 3018.9751  | 1216.276567 | 1219.913933 | 1220.2403   | 1220.346367 |
| 1088.8178 | 1088.4594  | 3005.213867 | 3013.670133 | 3015.039767 | 3017.137333 |
| 867.2012  | 866.9239   | 1085.097933 | 1088.2756   | 1088.367533 | 1088.4712   |
| 2918.6907 | 2919.4248  | 863.8809333 | 866.7259    | 866.8410333 | 866.8741667 |
| 835.7312  | 834.5124   | 2908.9221   | 2919.1072   | 2919.746433 | 2919.305533 |
| 1054.4195 | 1053.9034  | 831.7244333 | 834.8663667 | 835.0688333 | 835.2516667 |
| 1169.2573 | 1169.31495 | 1049.035567 | 1053.626633 | 1053.796867 | 1053.9881   |
| 2447.122  | 2447.2869  | 1163.157467 | 1168.6317   | 1168.911167 | 1169.1123   |
| 2819.3626 | 2819.2392  | 2435.597133 | 2446.0132   | 2446.3141   | 2446.091133 |
| 938.3915  | 937.9586   | 2806.005233 | 2817.055667 | 2817.718933 | 2818.3461   |
| 1459.7808 | 1459.8942  | 933.9416667 | 937.6952    | 937.74      | 937.9844667 |
| 2702.7865 | 2703.0162  | 1452.572967 | 1459.291    | 1459.639833 | 1459.924533 |
| 1015.7444 | 1015.6581  | 2690.866333 | 2701.270467 | 2701.6309   | 2702.322233 |
| 1153.0002 | 1153.02985 | 1012.1551   | 1015.166333 | 1015.330833 | 1015.534567 |
| 2258.3928 | 2258.3845  | 1149.426067 | 1152.602967 | 1152.639233 | 1152.8669   |
| 828.8123  | 828.8313   | 2250.6954   | 2256.9955   | 2257.1706   | 2257.5084   |
| 1699.4143 | 1698.895   | 825.8670667 | 828.5201    | 828.7176667 | 828.8716333 |
| 2071.1633 | 2071.1389  | 1693.895833 | 1698.4924   | 1698.49445  | 1698.6208   |
| 1165.4415 | 1165.4415  | 2064.2596   | 2070.056667 | 2070.2366   | 2070.607367 |
| 1409.542  | 1409.2365  | 1163.233033 | 1164.747667 | 1165.3206   | 1165.636067 |
| 1666.2762 | 1666.43    | 1405.473567 | 1408.618167 | 1408.964233 | 1408.938567 |
| 1424.692  | 1424.6286  | 1661.764567 | 1665.8003   | 1665.914567 | 1666.0712   |
| 1261.3051 | 1261.2578  | 1420.4597   | 1424.196867 | 1424.279333 | 1424.566433 |
| 1123.6347 | 1123.6656  | 1257.1708   | 1260.8019   | 1260.882333 | 1261.112667 |
| 1008.8795 | 1008.8171  | 1120.235967 | 1123.2201   | 1123.266167 | 1123.749633 |
|           |            | 1004.9919   | 1008.3216   | 1008.431533 | 1008.640233 |

| 60          | 240         |                            | 0.167       | 1           |
|-------------|-------------|----------------------------|-------------|-------------|
| 876.073025  | 875.9027667 | MLVPRGSL                   | 46.60222222 | 48.14166667 |
| 1007.6484   | 1007.4652   | MLVPRGSLM                  | 44.52428571 | 46.26857143 |
| 1462.24455  | 1462.164433 | KSKQTFPPFTIY               | 44.51444444 | 46.67592593 |
| 1333.783575 | 1333.521067 | SKQTFPPFTIY                | 47.94625    | 48.70916667 |
| 1463.3874   | 1463.314367 | SKQTFPPFTIYE               | 48.53703704 | 48.89851852 |
| 1245.976325 | 1245.820667 | KQTFPPFTIY                 | 49.82714286 | 48.64285714 |
| 953.863775  | 953.7368667 | QTFPPFTI                   | 52.108      | 53.49933333 |
| 1118.25705  | 1118.2212   | QTFPPFTIY                  | 46.03388889 | 48.09666667 |
| 1247.31175  | 1247.296233 | QTFPPFTIYE                 | 51.88285714 | 53.87761905 |
| 1562.9894   | 1563.063633 | QTFPPFTIYEGEK              | 47.511      | 48.653      |
| 2304.0205   | 2304.221333 | QTFPPFTIYEGEKQHESEE        | 36.27270833 | 36.89958333 |
| 2680.466375 | 2680.998633 | QTFPPFTIYEGEKQHESEEPFM     | 36.87740741 | 37.52425926 |
| 3036.7294   | 3037.272533 | QTFPPFTIYEGEKQHESEEPFMPEE  | 38.1265     | 38.31916667 |
| 3052.861425 | 3053.5934   | QTFPPFTIYEGEKQHESEEPFMPEE  | 38.02783333 | 37.58666667 |
| 988.8694    | 988.8530333 | TFPPFTIY                   | 52.26933333 | 54.34333333 |
| 1118.458375 | 1118.501467 | TFPPFTIYE                  | 50.48833333 | 53.21166667 |
| 2175.306375 | 2175.524433 | TFPPFTIYEGEKQHESEE         | 35.77555556 | 35.996      |
| 2551.775675 | 2552.382    | TFPPFTIYEGEKQHESEEPFM      | 36.55901961 | 36.18490196 |
| 2907.949975 | 2908.442633 | TFPPFTIYEGEKQHESEEPFMPEE   | 36.79912281 | 36.8554386  |
| 2924.064125 | 2924.531033 | TFPPFTIYEGEKQHESEEPFMPEE   | 36.89736842 | 37.12017544 |
| 1829.063525 | 1829.129467 | FPTIYEGEKQHESEE            | 35.60820513 | 35.02102564 |
| 2561.70745  | 2562.279733 | FPTIYEGEKQHESEEPFMPEE      | 36.90686275 | 36.89196078 |
| 842.71155   | 842.7747    | TIYEGEK                    | 42.83388889 | 44.72       |
| 1584.3805   | 1584.380267 | TIYEGEKQHESEE              | 36.35416667 | 36.25333333 |
| 1960.19105  | 1960.447167 | TIYEGEKQHESEEPFM           | 32.72428571 | 32.40404762 |
| 2316.47125  | 2316.764367 | TIYEGEKQHESEEPFMPEE        | 34.0225     | 33.98333333 |
| 2332.570325 | 2332.908633 | TIYEGEKQHESEEPFMPEE        | 34.84208333 | 34.75958333 |
| 2576.927125 | 2577.048667 | TIYEGEKQHESEEPFMPEERC      | 34.34962963 | 40.98       |
| 3148.110775 | 3148.344733 | TIYEGEKQHESEEPFMPEERCLPRMA | 66.77515152 | 49.11909091 |
| 1857.8092   | 1857.811733 | IYEGEKQHESEEPFM            | 28.20205128 | 28.06974359 |
| 2214.44145  | 2214.737267 | IYEGEKQHESEEPFMPEE         | 30.88911111 | 30.84511111 |
| 2100.984725 | 2100.9042   | YEGEKQHESEEPFMPEE          | 29.15357143 | 31.61380952 |
| 1580.990225 | 1580.972233 | EGEKQHESEEPFM              | 27.61757576 | 27.42848485 |
| 1937.251375 | 1937.2856   | EGEKQHESEEPFMPEE           | 29.86820513 | 29.75051282 |
| 1953.31945  | 1953.343533 | EGEKQHESEEPFMPEE           | 30.00435897 | 29.49307692 |
| 2409.7962   | 2410.065967 | EGEKQHESEEPFMPEERCLP       | 37.315625   | 39.37645833 |
| 2768.60635  | 2768.120633 | EGEKQHESEEPFMPEERCLPRMA    | 36.43859649 | 31.79368421 |
| 1807.863475 | 1807.877133 | GEKQHESEEPFMPEE            | 30.69777778 | 30.61638889 |
| 1491.950325 | 1492.020633 | QHESEEPFMPEE               | 34.33666667 | 29.99518519 |
| 908.3791    | 908.2951333 | PFMPEER                    | 50.25166667 | 55.51583333 |
| 1582.86015  | 1582.811233 | PFMPEERCLPRMA              | 49.58333333 | 51.18740741 |
| 1134.153275 | 1133.909767 | MPEERCLPR                  | 44.665      | 46.24944444 |
| 1206.12955  | 1205.945067 | PEERCLPRMA                 | 49.07380952 | 50.62238095 |
| 849.308575  | 848.9172333 | RCLPRMA                    | 43.74333333 | 44.562      |
| 1249.10285  | 1248.853267 | RCLPRMASPVN                | 52.96708333 | 53.83       |
| 847.52065   | 847.4674    | ASPVNVKE                   | 54.48694444 | 55.70638889 |
| 1905.0367   | 1905.1235   | ASPVNVKEEVKEPPGTNT         | 51.08666667 | 52.37785714 |
| 776.272125  | 776.2117333 | SPVNVKE                    | 63.61066667 | 65.86333333 |
| 905.752875  | 905.6333    | SPVNVKEE                   | 55.3125     | 58.29583333 |
| 1515.510725 | 1515.5129   | SPVNVKEEVKEPPG             | 54.06966667 | 55.93266667 |
| 1732.0675   | 1732.0358   | SPVNVKEEVKEPPGTN           | 54.62125    | 56.09430556 |
| 1833.74335  | 1833.680067 | SPVNVKEEVKEPPGTNT          | 54.13025641 | 55.37512821 |
| 2047.6646   | 2047.802367 | SPVNVKEEVKEPPGTNTVI        | 55.11577778 | 56.44622222 |
| 2161.61675  | 2161.7009   | SPVNVKEEVKEPPGTNTVIL       | 53.42375    | 56.09770833 |
| 1746.191875 | 1746.073    | PVNVKEEVKEPPGTNT           | 53.60347222 | 54.68069444 |
| 1548.81625  | 1548.121767 | VNVKEEVKEPPGTN             | 51.47166667 | 52.93833333 |
| 1447.117075 | 1446.956367 | NVKEEVKEPPGTN              | 50.18833333 | 51.952      |
| 1548.856625 | 1548.747167 | NVKEEVKEPPGTNT             | 52.87848485 | 52.89606061 |
| 1332.0133   | 1331.861867 | VKEEVKEPPGTN               | 45.27796296 | 46.95685185 |
| 1433.823725 | 1433.718833 | VKEEVKEPPGTNT              | 48.60233333 | 50.38066667 |
| 1232.16355  | 1231.890167 | KEEVKEPPGTN                | 43.02770833 | 44.319375   |
| 1433.962425 | 1433.7078   | KEEVKEPPGTNTV              | 48.714      | 49.91066667 |
| 1791.2068   | 1791.155    | KEEVKEPPGTNTVILE           | 50.24961538 | 50.77679487 |

|             |             |                           |             |             |
|-------------|-------------|---------------------------|-------------|-------------|
| 1103.82945  | 1103.705433 | EEVKEPPGTN                | 47.26       | 49.37714286 |
| 1205.643025 | 1205.5805   | EEVKEPPGTNT               | 50.64979167 | 51.96854167 |
| 974.049325  | 973.9980333 | EVKEPPGTN                 | 46.94055556 | 48.01333333 |
| 1075.85755  | 1075.832133 | EVKEPPGTNT                | 49.5047619  | 51.07428571 |
| 844.417075  | 844.3859    | VKEPPGTN                  | 46.26866667 | 47.96333333 |
| 1220.447425 | 1220.622767 | YAHRLSQDIL                | 40.41518519 | 44.04148148 |
| 3017.7509   | 3018.522367 | YAHRLSQDILCDALQQWACNNIKYH | 35.23444444 | 40.94125    |
| 1088.669125 | 1088.556133 | HRLSQDILC                 | 39.72083333 | 40.87       |
| 866.947725  | 867.0395    | CDALQQW                   | 47.41611111 | 49.335      |
| 2918.400325 | 2920.644467 | CDALQQWACNNIKYHDIPYIESEGP | 46.29590909 | 49.20151515 |
| 835.34755   | 835.1306667 | DALQQWA                   | 52.36555556 | 55.74       |
| 1053.835725 | 1054.124233 | DALQQWACN                 | 57.38833333 | 59.51625    |
| 1169.429313 | 1169.31495  | DALQQWACNN                | 60.82481481 | 63.93       |
| 2446.9181   | 2447.177567 | DALQQWACNNIKYHDIPYIE      | 57.86703704 | 59.5387037  |
| 2818.00605  | 2818.946133 | DALQQWACNNIKYHDIPYIESEGP  | 52.62111111 | 55.77952381 |
| 938.199975  | 938.1420333 | ALQQWACN                  | 53.62190476 | 54.26190476 |
| 1459.9279   | 1459.809867 | ALQQWACNNIKY              | 61.0730303  | 64.24424242 |
| 2702.5387   | 2702.6704   | ALQQWACNNIKYHDIPYIESEGP   | 52.02066667 | 53.82283333 |
| 1015.650825 | 1015.651067 | WACNNIKY                  | 43.01761905 | 45.36761905 |
| 1153.108925 | 1153.02985  | WACNNIKYH                 | 39.71125    | 40.16458333 |
| 2257.956525 | 2258.1936   | WACNNIKYHDIPYIESEGP       | 39.375625   | 40.47       |
| 828.96495   | 828.8272    | ACNNIKY                   | 44.21722222 | 47.51       |
| 1698.91745  | 1699.083967 | ACNNIKYHDIPYIE            | 38.30472222 | 38.32180556 |
| 2070.91     | 2071.068267 | ACNNIKYHDIPYIESEGP        | 38.64711111 | 39.84666667 |
| 1165.430975 | 1165.4415   | NIKYHDIPY                 | 21.63761905 | 29.82238095 |
| 1409.047125 | 1409.220767 | NIKYHDIPYIE               | 34.94       | 38.78518519 |
| 1666.3006   | 1666.3095   | IKYHDIPYIESEGP            | 36.68848485 | 37.72727273 |
| 1424.670125 | 1424.6079   | YHDIPYIESEGP              | 41.52407407 | 42.44037037 |
| 1261.2293   | 1261.233767 | HDIPYIESEGP               | 45.38875    | 46.39416667 |
| 1123.6845   | 1123.616133 | DIPYIESEGP                | 42.63047619 | 43.28857143 |
| 1008.738725 | 1008.7584   | IPYIESEGP                 | 55.495      | 57.32722222 |

like w.r.t. theoretical - (%)

| 10          | 60          | 240         | Sequence                   |
|-------------|-------------|-------------|----------------------------|
| 50.87111111 | 50.88708333 | 48.04944444 | MLVPRGSL                   |
| 48.56809524 | 49.89238095 | 47.2752381  | MLVPRGSLM                  |
| 49.21814815 | 51.54537037 | 50.65518519 | KSKQTFPFPTIY               |
| 50.92791667 | 54.7309375  | 51.44958333 | SKQTFPFPTIY                |
| 52.59962963 | 53.73777778 | 52.9262963  | SKQTFPFPTIYE               |
| 50.97761905 | 51.88988095 | 49.66619048 | KQTFPFPTIY                 |
| 57.826      | 59.17483333 | 56.63666667 | QTFPFPTI                   |
| 56.56722222 | 54.56305556 | 53.96555556 | QTFPFPTIY                  |
| 56.93571429 | 58.67309524 | 58.45142857 | QTFPFPTIYE                 |
| 51.178      | 53.03633333 | 53.77866667 | QTFPFPTIYEGEK              |
| 39.28770833 | 41.38375    | 42.63895833 | QTFPFPTIYEGEKQHESEE        |
| 39.11925926 | 42.04578704 | 45.00277778 | QTFPFPTIYEGEKQHESEEPFM     |
| 40.56466667 | 42.85166667 | 45.56733333 | QTFPFPTIYEGEKQHESEEPFMPEE  |
| 40.91883333 | 42.873125   | 46.533      | QTFPFPTIYEGEKQHESEEPFMPEE  |
| 57.06133333 | 58.35333333 | 58.026      | TFPFPTIY                   |
| 55.40055556 | 56.74402778 | 57.46222222 | TFPFPTIYE                  |
| 38.79333333 | 40.36961111 | 41.82333333 | TFPFPTIYEGEKQHESEE         |
| 38.79705882 | 41.40181373 | 44.96843137 | TFPFPTIYEGEKQHESEEPFM      |
| 39.49491228 | 41.66828947 | 44.26122807 | TFPFPTIYEGEKQHESEEPFMPEE   |
| 39.37596491 | 41.93539474 | 44.39280702 | TFPFPTIYEGEKQHESEEPFMPEE   |
| 38.57102564 | 40.36608974 | 40.87333333 | FPTIYEGEKQHESEE            |
| 39.16647059 | 41.29676471 | 44.66313725 | FPTIYEGEKQHESEEPFMPEE      |
| 47.35833333 | 47.20416667 | 48.25666667 | TIYEGEK                    |
| 39.34555556 | 40.10333333 | 40.10138889 | TIYEGEKQHESEE              |
| 35.04071429 | 36.55369048 | 38.38309524 | TIYEGEKQHESEEPFM           |
| 36.56520833 | 38.27510417 | 40.10708333 | TIYEGEKQHESEEPFMPEE        |
| 37.23604167 | 38.69453125 | 40.80895833 | TIYEGEKQHESEEPFMPEE        |
| 37.54       | 40.17921296 | 40.85444444 | TIYEGEKQHESEEPFMPEERC      |
| 46.50848485 | 44.19276515 | 45.25621212 | TIYEGEKQHESEEPFMPEERCLPRMA |
| 29.85820513 | 30.00487179 | 30.02435897 | IYEGEKQHESEEPFM            |
| 33.304      | 34.48144444 | 36.45355556 | IYEGEKQHESEEPFMPEE         |
| 30.49357143 | 35.19970238 | 34.62452381 | YEGEKQHESEEPFMPEE          |
| 29.45151515 | 30.7944697  | 30.63090909 | EGEKQHESEEPFM              |
| 32.13641026 | 33.4900641  | 33.75333333 | EGEKQHESEEPFMPEE           |
| 31.9174359  | 33.46423077 | 33.64948718 | EGEKQHESEEPFMPEE           |
| 42.63       | 45.91875    | 47.60479167 | EGEKQHESEEPFMPEERCLP       |
| 38.94157895 | 40.33535088 | 37.77894737 | EGEKQHESEEPFMPEERCLPRMA    |
| 33.13777778 | 34.18534722 | 34.29916667 | GEKQHESEEPFMPEE            |
| 21.94740741 | 27.85694444 | 28.63814815 | QHESEEPFMPEE               |
| 59.94416667 | 60.14333333 | 58.04416667 | PFMPEER                    |
| 54.56037037 | 55.98203704 | 55.43851852 | PFMPEERCLPRMA              |
| 49.01055556 | 49.10402778 | 45.04555556 | MPEERCLPR                  |
| 53.24809524 | 54.535      | 51.89952381 | PEERCLPRMA                 |
| 46.96066667 | 48.39016667 | 40.56333333 | RCLPRMA                    |
| 56.81375    | 58.82354167 | 55.70375    | RCLPRMASPVN                |
| 58.90805556 | 60.09666667 | 59.20916667 | ASPVNVKE                   |
| 55.5647619  | 56.85357143 | 57.47357143 | ASPVNVKEEVKEPPGTNT         |
| 68.86866667 | 70.3345     | 69.12666667 | SPVNVKE                    |
| 63.66805556 | 64.09041667 | 62.0975     | SPVNVKEE                   |
| 60.18533333 | 59.14325    | 59.165      | SPVNVKEEVKEPPG             |
| 59.41597222 | 60.84458333 | 60.58041667 | SPVNVKEEVKEPPGTN           |
| 59.00564103 | 60.46807692 | 59.98128205 | SPVNVKEEVKEPPGTNT          |
| 59.74844444 | 61.91888889 | 62.83733333 | SPVNVKEEVKEPPGTNTVI        |
| 60.30375    | 61.8465625  | 62.3725     | SPVNVKEEVKEPPGTNTVIL       |
| 58.65375    | 60.24520833 | 59.25458333 | PVNVKEEVKEPPGTNT           |
| 56.07833333 | 56.81818182 | 50.50469697 | VNVKEEVKEPPGTN             |
| 54.94966667 | 55.99575    | 54.38866667 | NVKEEVKEPPGTN              |
| 57.44121212 | 58.06568182 | 57.07060606 | NVKEEVKEPPGTNT             |
| 49.58055556 | 50.18277778 | 48.50018519 | VKEEVKEPPGTN               |
| 52.44366667 | 52.92925    | 51.88033333 | VKEEVKEPPGTNT              |
| 45.53395833 | 48.875      | 45.45770833 | KEEVKEPPGTN                |
| 54.07233333 | 54.10125    | 51.555      | KEEVKEPPGTNTV              |
| 54.01730769 | 55.74653846 | 55.34807692 | KEEVKEPPGTNTVILE           |

|             |             |             |
|-------------|-------------|-------------|
| 50.48190476 | 53.93928571 | 52.16761905 |
| 53.47520833 | 55.3359375  | 54.554375   |
| 50.53833333 | 51.75541667 | 50.90055556 |
| 53.49047619 | 54.39642857 | 54.03333333 |
| 50.27933333 | 50.9755     | 50.352      |
| 45.22       | 46.34287037 | 48.29111111 |
| 49.68111111 | 52.23763889 | 55.45208333 |
| 42.16583333 | 44.63989583 | 43.2275     |
| 49.88722222 | 51.11319444 | 52.64277778 |
| 47.19742424 | 43.08284091 | 53.28348485 |
| 58.78722222 | 60.38527778 | 56.77055556 |
| 61.90666667 | 60.00197917 | 63.60833333 |
| 66.16481481 | 69.68717593 | 68.41648148 |
| 58.3        | 62.89425926 | 64.33574074 |
| 58.76603175 | 57.14674603 | 61.62333333 |
| 57.75428571 | 60.83297619 | 60.0052381  |
| 66.83242424 | 66.8630303  | 65.79       |
| 57.2795     | 58.36183333 | 59.02033333 |
| 48.27809524 | 49.93892857 | 49.94238095 |
| 43.01041667 | 46.03572917 | 45.04729167 |
| 42.58125    | 45.38203125 | 46.86375    |
| 50.07611111 | 51.63138889 | 49.33555556 |
| 39.37472222 | 41.84680556 | 43.23444444 |
| 42.31844444 | 44.336      | 45.39111111 |
| 34.32904762 | 31.39916667 | 31.54952381 |
| 38.5        | 39.7062037  | 41.63555556 |
| 39.15121212 | 41.23666667 | 41.31757576 |
| 45.63037037 | 46.7825     | 46.09111111 |
| 49.27333333 | 50.73125    | 50.78708333 |
| 50.1952381  | 49.2647619  | 48.28809524 |
| 60.80555556 | 62.44708333 | 62.775      |

EEVKEPPGTN  
EEVKEPPGTNT  
EVKEPPGTN  
EVKEPPGTNT  
VKEPPGTN  
YAHRLSQDIL  
YAHRLSQDILCDALQQWACNNIKYH  
HRLSQDILC  
CDALQQW  
CDALQQWACNNIKYHDIPYIESEGP  
DALQQWA  
DALQQWACN  
DALQQWACNN  
DALQQWACNNIKYHDIPYIE  
DALQQWACNNIKYHDIPYIESEGP  
ALQQWACN  
ALQQWACNNIKY  
ALQQWACNNIKYHDIPYIESEGP  
WACNNIKY  
WACNNIKYH  
WACNNIKYHDIPYIESEGP  
ACNNIKY  
ACNNIKYHDIPYIE  
ACNNIKYHDIPYIESEGP  
NIKYHDIPY  
NIKYHDIPYIE  
IKYHDIPYIESEGP  
YHDIPYIESEGP  
HDIPYIESEGP  
DIPYIESEGP  
IPYIESEGP

Difference uptake 240 min and 10 sec (%)

1  
3  
6  
4  
4  
0  
5  
8  
7  
6  
6  
8  
7  
9  
6  
7  
6  
8  
7  
7  
5  
8  
5  
4  
6  
6  
6  
7  
-22  
2  
6  
5  
3  
4  
4  
4  
10  
1  
4  
-6  
8  
6  
0  
3  
-3  
3  
5  
6  
6  
7  
5  
6  
6  
8  
9  
6  
-1  
4  
4  
3  
3  
2  
3  
5



5  
4  
4  
5  
4  
8  
20  
4  
5  
7  
4  
6  
8  
6  
9  
6  
5  
7  
7  
5  
7  
5  
5  
7  
10  
7  
5  
5  
5  
6  
7
